# Supplementary material for: A novel lineage of the Capra genus discovered in the Taurus Mountains of Turkey using ancient genomics
Source: eLife. 2022 Oct 3;11:e82984. doi: 10.7554/eLife.82984 (PMC9529249; doi:10.7554/eLife.82984)
Supplement: Supplementary file 1. — (A) Sample information. (B) Bias of D statistic tests involving Direkli4. (C) Published samples used in the present study. (D) Sample sequencing statistics. (E) Direkli1-2 (bezoar)-Direkli4 (tur-like) relative affinity measured using D(Direkli1-2, Direkli4; X, Sheep). (F) Published mtDNA sequences included in ML phylogeny. (G) Direkli4-Abdul4 relative affinity measured using D(X, Abdul4; Direkli4, Sheep). (H) Ganjdareh3-Direkli4 relative affinity measured using D(X, Ganjdareh3; Direkli4, Sheep). (I) Direkli4-Tur1 (west Caucasian tur) relative affinity measured using D(Direkli4, Tur1; X, Sheep). (J) Extended D statistic, Direkli4 set as H3 (“Direkli4-specific alleles”). (L) Extended D statistic, Direkli4 set as H3, sheep-ascertained. (M) Correlation of extended D values. (N) Extended D values, rotating H3 among different wild Capra genomes. [file elife-82984-supp1.xlsx]

## Sheet: 1A
Sample information.
Sample	Morphological Species	Origin	Age	Sex	Nuclear Coverage	mtDNA Coverage	Endogenous %age	mtDNA haplogroup (per Daly 2018)	Sample Accession	Bone type	% error (perfect genome approach)
Direkli4	Capra spc.	E4/8A, Direkli Cave, Turkey	12,164-11,864 cal BCE (2σ)	M	2.59	642.23	25.89	F	ERS2430418	Petrous	0.0264
Direkli9	Capra spc.	B6/5, Direkli Cave, Turkey	Est. 12,100-8,900 BCE	M	0.0003	9.5	0.81	T	ERS11455442	Long bone fragment	0.0608
Direkli12	Capra spc.	B13/4A, Direkli Cave, Turkey	Est. 12,100-8,900 BCE	M	0.07	44.06	19.99	F	ERS11453864	Long bone fragment	0.0442
Direki13	Capra spc.	B13/7B, Direkli Cave, Turkey	Est. 12,100-8,900 BCE	M	0.0055	76.99	7.21	T	ERS11453865	Long bone fragment	0.0496
Direkli14	Capra spc.	D3/7, Direkli Cave, Turkey	Est. 12,100-8,900 BCE	M	0.0005	13.24	0.34	F	ERS11453866	Long bone fragment	0.0587
Direkli15	Capra spc.	B6/5, Direkli Cave, Turkey	Est. 12,100-8,900 BCE	F	0.0002	24.21	0.96	T	ERS11453867	Long bone fragment	0.1947
Direkli16	Capra spc.	B8/7, Direkli Cave, Turkey	Est. 12,100-8,900 BCE	F	0.01	15.11	1.76	F	ERS11453868	Long bone fragment	0.0457
Direkli17	Capra spc.	E5/5, Direkli Cave, Turkey	Est. 12,100-8,900 BCE	F	0.0001	0.0845	0.42	F	ERS11453869	Long bone fragment	0.1066
Caucasus1	Capra caucasica	Tamara Fort, Kazbegi, Georgia	4th-21st c. CE, probably 5th-15th c. CE	M	0.55	64.63	27.87	T	ERS11453870	Metacarpal	0.1573
Caucasus2	Capra caucasica	Tamara Fort, Kazbegi, Georgia	4th-21st c. CE, probably 5th-15th c. CE	M	0.0021	379.71	0.87	T	ERS11453871	Tibia	NA
Caucasus3	Capra caucasica	Tamara Fort, Kazbegi, Georgia	4th-21st c. CE, probably 5th-15th c. CE	M	0.004	464.51	1.13	F	ERS11453872	Long bone	NA
Falconeri1_MNHN-ZM-AC-2009-243	Capra falconeri hepteneri	Unknown, via Parc de la Haute-Touche (MNHN ZM AC 2009-243)	20th Century CE	M	0.58	72.11	11.18	-	ERS11453873	Tooth root	0.1726
Falconeri2_MNHN-ZM-AC-1988-227	Capra falconeri	Born at MNHN Zoo, Paris	20th Century CE	M	0.06	45.78	3.59	-	ERS11453874	Tooth root	0.19
Ibex1_MNHN-ZM-AC-1909-113	Capra ibex	Unknown	20th Century CE	F	3.93	179.03	62.09	-	ERS11453875	Tooth root	0.027
Ibex2_MNHN-ZM-AC-1938-1296	Capra ibex	Pointe de Calabre, Savoie	20th Century CE	M	0.05	21.4	18.44	-	ERS11453876	Tooth root	0.207
Sibirica1_MNHN-ZM-AC-1997-1776	Capra sibirica	Born at MNHN Zoo, Paris	20th Century CE	M	0.04	163.16	11.79	-	ERS11453877	Tooth root	0.3428
Sibirica2_MNHN-ZM-AC-1974-98	Capra sibirica	Born at MNHN Zoo, Paris	20th Century CE	F	1.48	205.78	41.6	-	ERS11453878	Tooth root	0.0948
Tur2_MNHN-ZM-AC-1945-68	Capra cylindricornis	Unknown, via Vincennes Zoo	20th Century CE	F	0.02	4.96	9.08	-	ERS11453879	Tooth root	0.0611
Walie1_MNHN-ZM-AC-1990-691	Capra walie	Born at MNHN Zoo, Paris	20th Century CE	M	0.75	103.12	22.87	-	ERS11453880	Tooth root	0.1172
Pyrenaica2_MNHN-ZM-AC-1947-1	Capra pyrenaica	Unknown	20th Century CE	M	0.16	51.2	9.36	-	ERS11453881	Tooth root	0.3408
Nubiana1_MNHN-ZM-AC-2010-642	Capra nubiana	Unknown	20th Century CE	M	1.25	211.32	24.73	-	ERS11453882	Tooth root	0.2261

## Sheet: 1B
Bias of D statistic tests involving Direkli4.
H1	H2	H3	nABBA	nBABA	D	jackEst	SE	Z
Blagotin3	Direkli4	Abdul4	59307	857401	-0.870609	-0.870609	0.00310272	-280.595
Direkli1-2	Direkli4	Abdul4	57969	857645	-0.873377	-0.873377	0.00298341	-292.744
Direkli5	Direkli4	Abdul4	11401	189953	-0.886757	-0.886757	0.00284433	-311.763
Direkli6	Direkli4	Abdul4	48516	756437	-0.879456	-0.879456	0.00287901	-305.472
Hovk1	Direkli4	Abdul4	50532	798953	-0.881029	-0.881029	0.00289521	-304.306
Semnan3	Direkli4	Abdul4	58967	873350	-0.873504	-0.873504	0.00297092	-294.018
Moroccan8	Direkli4	Abdul4	57911	864423	-0.874425	-0.874425	0.00297296	-294.126
Moroccan3	Direkli4	Abdul4	57875	864908	-0.874564	-0.874564	0.00300502	-291.034
Tog	Direkli4	Abdul4	61493	864340	-0.867162	-0.867162	0.00301726	-287.401
Ethiopian1	Direkli4	Abdul4	57959	865482	-0.874472	-0.874472	0.00300039	-291.452
Sudanese6	Direkli4	Abdul4	58597	864935	-0.873102	-0.873102	0.00285457	-305.861
Nigerian2	Direkli4	Abdul4	57796	861013	-0.874194	-0.874194	0.00298826	-292.543
Aerbasi1	Direkli4	Abdul4	41569	662554	-0.881927	-0.881927	0.00280659	-314.234
Alashan3	Direkli4	Abdul4	52184	818817	-0.880175	-0.880175	0.00284148	-309.76
CHIR1	Direkli4	Abdul4	59763	873809	-0.871969	-0.871969	0.00312441	-279.083
Bangladeshi7	Direkli4	Abdul4	57132	872721	-0.877116	-0.877116	0.00289557	-302.917
Bangladeshi2	Direkli4	Abdul4	57507	872578	-0.87634	-0.87634	0.00288522	-303.734
Pakistani3	Direkli4	Abdul4	58309	872311	-0.874688	-0.874688	0.00297369	-294.142
Swiss2	Direkli4	Abdul4	59619	858741	-0.870162	-0.870162	0.00301597	-288.518
IOG	Direkli4	Abdul4	59126	860956	-0.871477	-0.871477	0.00294513	-295.904
French6	Direkli4	Abdul4	58240	860102	-0.873163	-0.873163	0.00303195	-287.987
Dutch1	Direkli4	Abdul4	57502	857903	-0.874368	-0.874368	0.00298016	-293.396
Italian1	Direkli4	Abdul4	58405	860023	-0.872815	-0.872815	0.00295339	-295.53
French2	Direkli4	Abdul4	58559	860358	-0.872548	-0.872548	0.0030009	-290.762
AlborzBezoar3	Direkli4	Abdul4	55917	866962	-0.878821	-0.878821	0.00285764	-307.533
AlborzBezoar2	Direkli4	Abdul4	56507	869124	-0.877906	-0.877906	0.00292077	-300.573
ZagrosBezoar2	Direkli4	Abdul4	56501	872379	-0.878346	-0.878346	0.00287027	-306.015
ZagrosBezoar3	Direkli4	Abdul4	56049	872938	-0.879333	-0.879333	0.00288017	-305.306
AlborzBezoar4	Direkli4	Abdul4	55851	870486	-0.879415	-0.879415	0.00286175	-307.3
AzerbaijanBezoar1	Direkli4	Abdul4	55713	868908	-0.87949	-0.87949	0.00288596	-304.748
ZagrosBezoar4	Direkli4	Abdul4	55235	868563	-0.880418	-0.880418	0.00286507	-307.294
AzerbaijanBezoar5	Direkli4	Abdul4	55580	865840	-0.87936	-0.87936	0.00283439	-310.246
AzerbaijanBezoar6	Direkli4	Abdul4	54990	866885	-0.8807	-0.8807	0.00284263	-309.818
MarkaziBezoar1	Direkli4	Abdul4	57142	875278	-0.877433	-0.877433	0.00293715	-298.736
AzerbaijanBezoar10	Direkli4	Abdul4	56203	868288	-0.878413	-0.878413	0.00294991	-297.777
AlborzBezoar1	Direkli4	Abdul4	55941	866099	-0.878658	-0.878658	0.00287743	-305.362
AlborzBezoar5	Direkli4	Abdul4	56399	868886	-0.878094	-0.878094	0.00289723	-303.081
AlborzBezoar6	Direkli4	Abdul4	56533	865861	-0.877421	-0.877421	0.00287137	-305.576
MarkaziBezoar2	Direkli4	Abdul4	58764	872012	-0.873731	-0.873731	0.0030101	-290.267
MarkaziBezoar3	Direkli4	Abdul4	57884	873454	-0.875697	-0.875697	0.0029698	-294.867
Iranian11	Direkli4	Abdul4	57653	870881	-0.875819	-0.875819	0.00297999	-293.9
Iranian16	Direkli4	Abdul4	57826	870831	-0.875463	-0.875463	0.00300203	-291.624
Iranian18	Direkli4	Abdul4	57236	870643	-0.87663	-0.87663	0.00287378	-305.045
Iranian19	Direkli4	Abdul4	57306	870541	-0.876475	-0.876475	0.0029623	-295.876
Iranian4	Direkli4	Abdul4	57179	870601	-0.87674	-0.87674	0.00290384	-301.924
Iranian22	Direkli4	Abdul4	57705	870040	-0.875602	-0.875602	0.00294784	-297.032
Iranian21	Direkli4	Abdul4	56591	870406	-0.877905	-0.877905	0.00290575	-302.126
Abdul4	Direkli4	Blagotin3	62796	857401	-0.863516	-0.863516	0.00327803	-263.425
Direkli1-2	Direkli4	Blagotin3	72102	1014525	-0.867292	-0.867292	0.00326789	-265.399
Direkli5	Direkli4	Blagotin3	13940	218035	-0.879815	-0.879815	0.00300667	-292.621
Direkli6	Direkli4	Blagotin3	58883	886010	-0.875366	-0.875366	0.00297237	-294.501
Hovk1	Direkli4	Blagotin3	65531	921862	-0.867265	-0.867265	0.00330926	-262.072
Semnan3	Direkli4	Blagotin3	79559	997842	-0.852313	-0.852313	0.00353483	-241.119
Moroccan8	Direkli4	Blagotin3	71514	1031377	-0.870315	-0.870315	0.00321618	-270.605
Moroccan3	Direkli4	Blagotin3	72068	1027232	-0.868884	-0.868884	0.00322544	-269.385
Tog	Direkli4	Blagotin3	77056	1025286	-0.860196	-0.860196	0.0032845	-261.896
Ethiopian1	Direkli4	Blagotin3	73795	1017184	-0.864718	-0.864718	0.00332277	-260.24
Sudanese6	Direkli4	Blagotin3	74149	1016498	-0.864027	-0.864027	0.0032585	-265.161
Nigerian2	Direkli4	Blagotin3	71636	1021677	-0.868956	-0.868956	0.00327626	-265.228
Aerbasi1	Direkli4	Blagotin3	55331	761264	-0.864484	-0.864484	0.00331191	-261.022
Alashan3	Direkli4	Blagotin3	69097	941297	-0.863228	-0.863228	0.00337746	-255.585
CHIR1	Direkli4	Blagotin3	80237	1001351	-0.851631	-0.851631	0.00367837	-231.524
Bangladeshi7	Direkli4	Blagotin3	77361	996607	-0.855934	-0.855934	0.00353377	-242.216
Bangladeshi2	Direkli4	Blagotin3	77608	997278	-0.855598	-0.855598	0.00352503	-242.72
Pakistani3	Direkli4	Blagotin3	78216	999088	-0.854793	-0.854793	0.00351717	-243.035
Swiss2	Direkli4	Blagotin3	68035	1066019	-0.880015	-0.880015	0.00291086	-302.321
IOG	Direkli4	Blagotin3	67908	1065227	-0.880141	-0.880141	0.00288536	-305.037
French6	Direkli4	Blagotin3	67329	1059497	-0.880498	-0.880498	0.00299826	-293.67
Dutch1	Direkli4	Blagotin3	67842	1047370	-0.878333	-0.878333	0.00306995	-286.107
Italian1	Direkli4	Blagotin3	66306	1064568	-0.882735	-0.882735	0.00285857	-308.803
French2	Direkli4	Blagotin3	67040	1063357	-0.881387	-0.881387	0.0029319	-300.62
AlborzBezoar3	Direkli4	Blagotin3	74089	997883	-0.861771	-0.861771	0.00340478	-253.106
AlborzBezoar2	Direkli4	Blagotin3	75219	999811	-0.860062	-0.860062	0.00344336	-249.774
ZagrosBezoar2	Direkli4	Blagotin3	76078	995639	-0.858026	-0.858026	0.00348546	-246.173
ZagrosBezoar3	Direkli4	Blagotin3	75654	995893	-0.858795	-0.858795	0.00344394	-249.364
AlborzBezoar4	Direkli4	Blagotin3	74721	1001663	-0.861163	-0.861163	0.00343418	-250.762
AzerbaijanBezoar1	Direkli4	Blagotin3	73319	1003927	-0.863877	-0.863877	0.00336044	-257.073
ZagrosBezoar4	Direkli4	Blagotin3	74864	991253	-0.859558	-0.859558	0.00344968	-249.171
AzerbaijanBezoar5	Direkli4	Blagotin3	72803	1000319	-0.864316	-0.864316	0.0033645	-256.893
AzerbaijanBezoar6	Direkli4	Blagotin3	72488	1002481	-0.865135	-0.865135	0.00330061	-262.113
MarkaziBezoar1	Direkli4	Blagotin3	77615	996095	-0.855426	-0.855426	0.00355633	-240.536
AzerbaijanBezoar10	Direkli4	Blagotin3	73759	1004912	-0.863241	-0.863241	0.00333265	-259.025
AlborzBezoar1	Direkli4	Blagotin3	74905	996624	-0.86019	-0.86019	0.00346841	-248.007
AlborzBezoar5	Direkli4	Blagotin3	75175	1000119	-0.860178	-0.860178	0.00345888	-248.687
AlborzBezoar6	Direkli4	Blagotin3	75430	996864	-0.859311	-0.859311	0.00343344	-250.277
MarkaziBezoar2	Direkli4	Blagotin3	80020	993614	-0.850936	-0.850936	0.00365718	-232.675
MarkaziBezoar3	Direkli4	Blagotin3	78471	994848	-0.853779	-0.853779	0.00353289	-241.666
Iranian11	Direkli4	Blagotin3	75229	1010644	-0.861441	-0.861441	0.00341014	-252.612
Iranian16	Direkli4	Blagotin3	75206	1012473	-0.861713	-0.861713	0.00341885	-252.048
Iranian18	Direkli4	Blagotin3	74425	1012577	-0.863064	-0.863064	0.00330869	-260.847
Iranian19	Direkli4	Blagotin3	74744	1011316	-0.862357	-0.862357	0.00339848	-253.748
Iranian4	Direkli4	Blagotin3	74392	1012989	-0.863172	-0.863172	0.00335101	-257.586
Iranian22	Direkli4	Blagotin3	75402	1010582	-0.861136	-0.861136	0.00343943	-250.372
Iranian21	Direkli4	Blagotin3	75062	1001688	-0.860577	-0.860577	0.00342414	-251.326
Abdul4	Direkli4	Direkli1-2	66780	857645	-0.855521	-0.855521	0.00339303	-252.141
Blagotin3	Direkli4	Direkli1-2	78030	1014525	-0.85716	-0.85716	0.0034519	-248.315
Direkli5	Direkli4	Direkli1-2	13574	228511	-0.887858	-0.887858	0.00285632	-310.84
Direkli6	Direkli4	Direkli1-2	57686	924728	-0.882563	-0.882563	0.00289171	-305.204
Hovk1	Direkli4	Direkli1-2	65291	951613	-0.871589	-0.871589	0.00323233	-269.647
Semnan3	Direkli4	Direkli1-2	85574	991718	-0.841131	-0.841131	0.00376723	-223.276
Moroccan8	Direkli4	Direkli1-2	80848	1004084	-0.850962	-0.850962	0.00356028	-239.015
Moroccan3	Direkli4	Direkli1-2	80936	1003507	-0.850733	-0.850733	0.00361075	-235.611
Tog	Direkli4	Direkli1-2	85784	1004177	-0.842592	-0.842592	0.00360365	-233.816
Ethiopian1	Direkli4	Direkli1-2	81369	1001022	-0.849649	-0.849649	0.00357711	-237.524
Sudanese6	Direkli4	Direkli1-2	81997	999686	-0.84839	-0.84839	0.00348216	-243.639
Nigerian2	Direkli4	Direkli1-2	80477	1000031	-0.851039	-0.851039	0.00359615	-236.653
Aerbasi1	Direkli4	Direkli1-2	60148	753219	-0.852101	-0.852101	0.00356034	-239.331
Alashan3	Direkli4	Direkli1-2	75172	931404	-0.850638	-0.850638	0.0035529	-239.421
CHIR1	Direkli4	Direkli1-2	86789	993228	-0.839282	-0.839282	0.0039358	-213.243
Bangladeshi7	Direkli4	Direkli1-2	83560	989311	-0.844231	-0.844231	0.00377294	-223.759
Bangladeshi2	Direkli4	Direkli1-2	83791	989683	-0.843888	-0.843888	0.00371419	-227.206
Pakistani3	Direkli4	Direkli1-2	84697	991411	-0.842586	-0.842586	0.0037435	-225.08
Swiss2	Direkli4	Direkli1-2	81136	1011975	-0.85155	-0.85155	0.00350773	-242.764
IOG	Direkli4	Direkli1-2	80845	1012133	-0.852065	-0.852065	0.00344944	-247.015
French6	Direkli4	Direkli1-2	79779	1010211	-0.853615	-0.853615	0.00355446	-240.153
Dutch1	Direkli4	Direkli1-2	79420	1004050	-0.853397	-0.853397	0.00352643	-242
Italian1	Direkli4	Direkli1-2	79573	1011312	-0.854113	-0.854113	0.00342862	-249.112
French2	Direkli4	Direkli1-2	79771	1011562	-0.85381	-0.85381	0.003472	-245.913
AlborzBezoar3	Direkli4	Direkli1-2	76900	1014599	-0.859093	-0.859093	0.00340548	-252.268
AlborzBezoar2	Direkli4	Direkli1-2	77821	1019766	-0.858196	-0.858196	0.00345962	-248.061
ZagrosBezoar2	Direkli4	Direkli1-2	80802	1000061	-0.850486	-0.850486	0.00359031	-236.884
ZagrosBezoar3	Direkli4	Direkli1-2	80389	1000540	-0.851259	-0.851259	0.00358643	-237.356
AlborzBezoar4	Direkli4	Direkli1-2	77250	1020405	-0.859245	-0.859245	0.00344747	-249.239
AzerbaijanBezoar1	Direkli4	Direkli1-2	74388	1033294	-0.865687	-0.865687	0.00329044	-263.091
ZagrosBezoar4	Direkli4	Direkli1-2	79368	994936	-0.852243	-0.852243	0.00356451	-239.091
AzerbaijanBezoar5	Direkli4	Direkli1-2	74293	1029591	-0.865397	-0.865397	0.00327839	-263.97
AzerbaijanBezoar6	Direkli4	Direkli1-2	73783	1030596	-0.866381	-0.866381	0.00325516	-266.156
MarkaziBezoar1	Direkli4	Direkli1-2	83411	994378	-0.845218	-0.845218	0.0037259	-226.85
AzerbaijanBezoar10	Direkli4	Direkli1-2	75186	1032855	-0.86429	-0.86429	0.00331441	-260.768
AlborzBezoar1	Direkli4	Direkli1-2	77750	1014558	-0.857641	-0.857641	0.00345888	-247.953
AlborzBezoar5	Direkli4	Direkli1-2	77565	1019657	-0.858616	-0.858616	0.00342612	-250.609
AlborzBezoar6	Direkli4	Direkli1-2	77848	1015791	-0.857635	-0.857635	0.00342248	-250.589
MarkaziBezoar2	Direkli4	Direkli1-2	86934	983149	-0.837519	-0.837519	0.00392461	-213.402
MarkaziBezoar3	Direkli4	Direkli1-2	84620	988333	-0.842267	-0.842267	0.00376838	-223.509
Iranian11	Direkli4	Direkli1-2	82400	997325	-0.847368	-0.847368	0.00368492	-229.956
Iranian16	Direkli4	Direkli1-2	82678	998673	-0.847084	-0.847084	0.00369296	-229.378
Iranian18	Direkli4	Direkli1-2	82032	998386	-0.848148	-0.848148	0.00362151	-234.197
Iranian19	Direkli4	Direkli1-2	82046	998586	-0.848152	-0.848152	0.00365552	-232.019
Iranian4	Direkli4	Direkli1-2	81577	999494	-0.849081	-0.849081	0.00359147	-236.416
Iranian22	Direkli4	Direkli1-2	82383	997812	-0.847466	-0.847466	0.00369847	-229.14
Iranian21	Direkli4	Direkli1-2	82082	991778	-0.847127	-0.847127	0.00367226	-230.683
Abdul4	Direkli4	Direkli5	13707	189953	-0.865393	-0.865393	0.00342083	-252.978
Blagotin3	Direkli4	Direkli5	15540	218035	-0.866938	-0.866938	0.00337015	-257.24
Direkli1-2	Direkli4	Direkli5	13841	228511	-0.885778	-0.885778	0.00299763	-295.492
Direkli6	Direkli4	Direkli5	11980	205067	-0.889609	-0.889609	0.0028855	-308.303
Hovk1	Direkli4	Direkli5	13190	209370	-0.88147	-0.88147	0.00315619	-279.283
Semnan3	Direkli4	Direkli5	17000	213654	-0.852593	-0.852593	0.00369623	-230.666
Moroccan8	Direkli4	Direkli5	15816	216726	-0.863973	-0.863973	0.00355012	-243.365
Moroccan3	Direkli4	Direkli5	15908	215965	-0.862787	-0.862787	0.00355947	-242.392
Tog	Direkli4	Direkli5	16700	216274	-0.856636	-0.856636	0.00359482	-238.298
Ethiopian1	Direkli4	Direkli5	16032	215656	-0.861607	-0.861607	0.00360897	-238.74
Sudanese6	Direkli4	Direkli5	16116	215891	-0.861073	-0.861073	0.0034779	-247.584
Nigerian2	Direkli4	Direkli5	15990	215475	-0.861837	-0.861837	0.0036319	-237.296
Aerbasi1	Direkli4	Direkli5	11981	163865	-0.863733	-0.863733	0.00354955	-243.336
Alashan3	Direkli4	Direkli5	14951	201125	-0.861614	-0.861614	0.00357616	-240.933
CHIR1	Direkli4	Direkli5	17090	214062	-0.852132	-0.852132	0.00386228	-220.629
Bangladeshi7	Direkli4	Direkli5	16407	213390	-0.857204	-0.857204	0.00373677	-229.397
Bangladeshi2	Direkli4	Direkli5	16507	213466	-0.856444	-0.856444	0.00368621	-232.337
Pakistani3	Direkli4	Direkli5	16655	213925	-0.855538	-0.855538	0.00372147	-229.893
Swiss2	Direkli4	Direkli5	16035	217773	-0.862836	-0.862836	0.00347965	-247.966
IOG	Direkli4	Direkli5	15959	217274	-0.86315	-0.86315	0.00357346	-241.544
French6	Direkli4	Direkli5	15740	217175	-0.864843	-0.864843	0.00354501	-243.961
Dutch1	Direkli4	Direkli5	15734	216566	-0.864537	-0.864537	0.00352495	-245.262
Italian1	Direkli4	Direkli5	15731	217462	-0.865082	-0.865082	0.00348318	-248.36
French2	Direkli4	Direkli5	15782	217364	-0.864617	-0.864617	0.00347775	-248.614
AlborzBezoar3	Direkli4	Direkli5	15293	219120	-0.869521	-0.869521	0.00341059	-254.948
AlborzBezoar2	Direkli4	Direkli5	15248	219623	-0.870158	-0.870158	0.00343422	-253.379
ZagrosBezoar2	Direkli4	Direkli5	15943	215834	-0.862428	-0.862428	0.00362284	-238.053
ZagrosBezoar3	Direkli4	Direkli5	15791	216301	-0.863925	-0.863925	0.0035941	-240.373
AlborzBezoar4	Direkli4	Direkli5	15202	220046	-0.870758	-0.870758	0.00339836	-256.229
AzerbaijanBezoar1	Direkli4	Direkli5	14444	222915	-0.878294	-0.878294	0.00320126	-274.359
ZagrosBezoar4	Direkli4	Direkli5	15615	214758	-0.864437	-0.864437	0.00351147	-246.175
AzerbaijanBezoar5	Direkli4	Direkli5	14445	221998	-0.877814	-0.877814	0.00322262	-272.391
AzerbaijanBezoar6	Direkli4	Direkli5	14441	222481	-0.878095	-0.878095	0.00323969	-271.043
MarkaziBezoar1	Direkli4	Direkli5	16514	214035	-0.856742	-0.856742	0.00370982	-230.939
AzerbaijanBezoar10	Direkli4	Direkli5	14652	222493	-0.87643	-0.87643	0.00328527	-266.776
AlborzBezoar1	Direkli4	Direkli5	15156	219159	-0.870636	-0.870636	0.00345757	-251.806
AlborzBezoar5	Direkli4	Direkli5	15203	220017	-0.870734	-0.870734	0.00339711	-256.316
AlborzBezoar6	Direkli4	Direkli5	15241	219262	-0.870015	-0.870015	0.00338365	-257.123
MarkaziBezoar2	Direkli4	Direkli5	17249	211801	-0.849387	-0.849387	0.00392139	-216.604
MarkaziBezoar3	Direkli4	Direkli5	16799	213086	-0.853849	-0.853849	0.00368695	-231.587
Iranian11	Direkli4	Direkli5	16309	214811	-0.85887	-0.85887	0.00370954	-231.53
Iranian16	Direkli4	Direkli5	16277	215234	-0.859385	-0.859385	0.0036681	-234.286
Iranian18	Direkli4	Direkli5	16209	215228	-0.859927	-0.859927	0.00358951	-239.567
Iranian19	Direkli4	Direkli5	16228	215199	-0.859757	-0.859757	0.00367208	-234.133
Iranian4	Direkli4	Direkli5	16033	215110	-0.861272	-0.861272	0.00359781	-239.388
Iranian22	Direkli4	Direkli5	16155	215480	-0.860513	-0.860513	0.00361752	-237.874
Iranian21	Direkli4	Direkli5	16207	214247	-0.859347	-0.859347	0.00364701	-235.631
Abdul4	Direkli4	Direkli6	57865	756437	-0.857878	-0.857878	0.00340275	-252.113
Blagotin3	Direkli4	Direkli6	66135	886010	-0.861082	-0.861082	0.00327098	-263.249
Direkli1-2	Direkli4	Direkli6	59685	924728	-0.87874	-0.87874	0.00296718	-296.153
Direkli5	Direkli4	Direkli6	11785	205067	-0.891308	-0.891308	0.00279616	-318.762
Hovk1	Direkli4	Direkli6	56555	833685	-0.872944	-0.872944	0.00323026	-270.24
Semnan3	Direkli4	Direkli6	72463	865300	-0.845456	-0.845456	0.00371408	-227.635
Moroccan8	Direkli4	Direkli6	68026	877016	-0.856036	-0.856036	0.0035213	-243.102
Moroccan3	Direkli4	Direkli6	67970	876858	-0.856122	-0.856122	0.00350563	-244.213
Tog	Direkli4	Direkli6	71848	876548	-0.848485	-0.848485	0.00356708	-237.865
Ethiopian1	Direkli4	Direkli6	68347	874689	-0.855049	-0.855049	0.00354235	-241.379
Sudanese6	Direkli4	Direkli6	69303	873403	-0.85297	-0.85297	0.0034642	-246.225
Nigerian2	Direkli4	Direkli6	67608	874064	-0.856409	-0.856409	0.00346496	-247.163
Aerbasi1	Direkli4	Direkli6	51135	659502	-0.856087	-0.856087	0.00350203	-244.455
Alashan3	Direkli4	Direkli6	63985	813619	-0.854182	-0.854182	0.00353433	-241.681
CHIR1	Direkli4	Direkli6	73128	866549	-0.844355	-0.844355	0.00381098	-221.559
Bangladeshi7	Direkli4	Direkli6	70531	864145	-0.849079	-0.849079	0.00368984	-230.113
Bangladeshi2	Direkli4	Direkli6	71089	863945	-0.847943	-0.847943	0.00365886	-231.751
Pakistani3	Direkli4	Direkli6	71566	864685	-0.847122	-0.847122	0.00365674	-231.66
Swiss2	Direkli4	Direkli6	67909	883156	-0.857194	-0.857194	0.00340541	-251.715
IOG	Direkli4	Direkli6	67815	883127	-0.857373	-0.857373	0.0034059	-251.732
French6	Direkli4	Direkli6	66982	882079	-0.858846	-0.858846	0.00341851	-251.234
Dutch1	Direkli4	Direkli6	66662	877450	-0.858784	-0.858784	0.00343434	-250.058
Italian1	Direkli4	Direkli6	66902	882861	-0.859119	-0.859119	0.00336874	-255.027
French2	Direkli4	Direkli6	67184	882571	-0.858523	-0.858523	0.00338068	-253.95
AlborzBezoar3	Direkli4	Direkli6	65193	884341	-0.862684	-0.862684	0.0033815	-255.119
AlborzBezoar2	Direkli4	Direkli6	65777	887392	-0.861982	-0.861982	0.00342485	-251.685
ZagrosBezoar2	Direkli4	Direkli6	68342	872117	-0.854662	-0.854662	0.00353479	-241.786
ZagrosBezoar3	Direkli4	Direkli6	67914	872937	-0.855633	-0.855633	0.00351069	-243.722
AlborzBezoar4	Direkli4	Direkli6	65083	888787	-0.863539	-0.863539	0.00336735	-256.445
AzerbaijanBezoar1	Direkli4	Direkli6	63032	898323	-0.868868	-0.868868	0.00325184	-267.193
ZagrosBezoar4	Direkli4	Direkli6	67099	868534	-0.85657	-0.85657	0.0034885	-245.541
AzerbaijanBezoar5	Direkli4	Direkli6	62796	895324	-0.868918	-0.868918	0.00326111	-266.448
AzerbaijanBezoar6	Direkli4	Direkli6	62418	896565	-0.869825	-0.869825	0.00323153	-269.168
MarkaziBezoar1	Direkli4	Direkli6	70444	867065	-0.849721	-0.849721	0.00366707	-231.717
AzerbaijanBezoar10	Direkli4	Direkli6	63552	898554	-0.86789	-0.86789	0.0032893	-263.852
AlborzBezoar1	Direkli4	Direkli6	65368	883895	-0.862276	-0.862276	0.00342282	-251.92
AlborzBezoar5	Direkli4	Direkli6	65654	887719	-0.86227	-0.86227	0.00338545	-254.699
AlborzBezoar6	Direkli4	Direkli6	65790	884283	-0.861505	-0.861505	0.00341912	-251.967
MarkaziBezoar2	Direkli4	Direkli6	73524	857703	-0.842092	-0.842092	0.00382783	-219.992
MarkaziBezoar3	Direkli4	Direkli6	71568	862429	-0.846749	-0.846749	0.00370693	-228.423
Iranian11	Direkli4	Direkli6	69632	871090	-0.851961	-0.851961	0.00359657	-236.881
Iranian16	Direkli4	Direkli6	69624	871897	-0.852103	-0.852103	0.00364261	-233.927
Iranian18	Direkli4	Direkli6	69317	871470	-0.85264	-0.85264	0.00357237	-238.676
Iranian19	Direkli4	Direkli6	68891	871792	-0.85353	-0.85353	0.003602	-236.96
Iranian4	Direkli4	Direkli6	68772	872245	-0.853835	-0.853835	0.00356668	-239.392
Iranian22	Direkli4	Direkli6	69579	870514	-0.851974	-0.851974	0.00361767	-235.504
Iranian21	Direkli4	Direkli6	69625	866175	-0.851197	-0.851197	0.00360498	-236.117
Abdul4	Direkli4	Hovk1	63768	798953	-0.85217	-0.85217	0.0036381	-234.235
Blagotin3	Direkli4	Hovk1	77284	921862	-0.8453	-0.8453	0.00385632	-219.198
Direkli1-2	Direkli4	Hovk1	71732	951613	-0.859809	-0.859809	0.00361638	-237.754
Direkli5	Direkli4	Hovk1	13918	209370	-0.875336	-0.875336	0.0032726	-267.474
Direkli6	Direkli4	Hovk1	60180	833685	-0.865349	-0.865349	0.00350894	-246.612
Semnan3	Direkli4	Hovk1	81260	916658	-0.837141	-0.837141	0.00406879	-205.747
Moroccan8	Direkli4	Hovk1	77837	920542	-0.844073	-0.844073	0.00396575	-212.841
Moroccan3	Direkli4	Hovk1	78167	919274	-0.843265	-0.843265	0.00392513	-214.838
Tog	Direkli4	Hovk1	82550	919041	-0.835162	-0.835162	0.00398537	-209.557
Ethiopian1	Direkli4	Hovk1	78548	918349	-0.842415	-0.842415	0.00394122	-213.744
Sudanese6	Direkli4	Hovk1	79254	917449	-0.840968	-0.840968	0.00382969	-219.591
Nigerian2	Direkli4	Hovk1	77958	916418	-0.843202	-0.843202	0.00393298	-214.392
Aerbasi1	Direkli4	Hovk1	57841	697694	-0.846887	-0.846887	0.00390055	-217.12
Alashan3	Direkli4	Hovk1	72191	860591	-0.845214	-0.845214	0.00386793	-218.518
CHIR1	Direkli4	Hovk1	82296	917533	-0.83538	-0.83538	0.00418851	-199.446
Bangladeshi7	Direkli4	Hovk1	79490	914396	-0.840042	-0.840042	0.00400958	-209.509
Bangladeshi2	Direkli4	Hovk1	80010	914818	-0.839148	-0.839148	0.00401904	-208.793
Pakistani3	Direkli4	Hovk1	80585	915676	-0.838225	-0.838225	0.00404786	-207.079
Swiss2	Direkli4	Hovk1	79135	922230	-0.841946	-0.841946	0.00395097	-213.098
IOG	Direkli4	Hovk1	78902	921803	-0.842307	-0.842307	0.00386109	-218.153
French6	Direkli4	Hovk1	77973	920538	-0.843822	-0.843822	0.0039495	-213.653
Dutch1	Direkli4	Hovk1	77161	918136	-0.844949	-0.844949	0.00388772	-217.338
Italian1	Direkli4	Hovk1	77817	921816	-0.844309	-0.844309	0.00385688	-218.91
French2	Direkli4	Hovk1	78371	920756	-0.843121	-0.843121	0.00392589	-214.759
AlborzBezoar3	Direkli4	Hovk1	71418	951437	-0.860356	-0.860356	0.00358607	-239.916
AlborzBezoar2	Direkli4	Hovk1	71792	955174	-0.860186	-0.860186	0.00367725	-233.921
ZagrosBezoar2	Direkli4	Hovk1	76513	927310	-0.847557	-0.847557	0.00388013	-218.435
ZagrosBezoar3	Direkli4	Hovk1	76178	928281	-0.84832	-0.84832	0.00386424	-219.531
AlborzBezoar4	Direkli4	Hovk1	71540	955300	-0.86066	-0.86066	0.00367058	-234.475
AzerbaijanBezoar1	Direkli4	Hovk1	68872	968520	-0.867221	-0.867221	0.00348275	-249.005
ZagrosBezoar4	Direkli4	Hovk1	75457	923638	-0.848949	-0.848949	0.00383242	-221.518
AzerbaijanBezoar5	Direkli4	Hovk1	68402	966481	-0.867807	-0.867807	0.00346483	-250.461
AzerbaijanBezoar6	Direkli4	Hovk1	68188	967628	-0.86834	-0.86834	0.00345944	-251.006
MarkaziBezoar1	Direkli4	Hovk1	79011	919187	-0.841693	-0.841693	0.00404752	-207.953
AzerbaijanBezoar10	Direkli4	Hovk1	69025	970550	-0.867205	-0.867205	0.00350645	-247.317
AlborzBezoar1	Direkli4	Hovk1	71853	951554	-0.859581	-0.859581	0.0036685	-234.314
AlborzBezoar5	Direkli4	Hovk1	71734	954415	-0.860188	-0.860188	0.00366218	-234.884
AlborzBezoar6	Direkli4	Hovk1	72240	951095	-0.858815	-0.858815	0.00365011	-235.285
MarkaziBezoar2	Direkli4	Hovk1	82928	904670	-0.832061	-0.832061	0.00421361	-197.47
MarkaziBezoar3	Direkli4	Hovk1	80452	911575	-0.837803	-0.837803	0.00404635	-207.051
Iranian11	Direkli4	Hovk1	79115	918853	-0.841448	-0.841448	0.00397347	-211.766
Iranian16	Direkli4	Hovk1	79232	918759	-0.841217	-0.841217	0.00402548	-208.973
Iranian18	Direkli4	Hovk1	78638	919951	-0.842502	-0.842502	0.00396885	-212.279
Iranian19	Direkli4	Hovk1	78849	918741	-0.841921	-0.841921	0.00399813	-210.579
Iranian4	Direkli4	Hovk1	78200	919852	-0.843295	-0.843295	0.00394988	-213.499
Iranian22	Direkli4	Hovk1	79033	918560	-0.841553	-0.841553	0.00398226	-211.325
Iranian21	Direkli4	Hovk1	78682	915443	-0.841706	-0.841706	0.00399388	-210.749
Abdul4	Direkli4	Semnan3	55645	873350	-0.880204	-0.880204	0.00277321	-317.395
Blagotin3	Direkli4	Semnan3	70516	997842	-0.867992	-0.867992	0.00311094	-279.012
Direkli1-2	Direkli4	Semnan3	70502	991718	-0.867255	-0.867255	0.00312009	-277.959
Direkli5	Direkli4	Semnan3	13487	213654	-0.881246	-0.881246	0.00287515	-306.504
Direkli6	Direkli4	Semnan3	57667	865300	-0.87504	-0.87504	0.00294794	-296.831
Hovk1	Direkli4	Semnan3	61138	916658	-0.874947	-0.874947	0.00306369	-285.586
Moroccan8	Direkli4	Semnan3	68960	1014869	-0.872748	-0.872748	0.00299868	-291.044
Moroccan3	Direkli4	Semnan3	69027	1014135	-0.872545	-0.872545	0.00306145	-285.01
Tog	Direkli4	Semnan3	73883	1013945	-0.864164	-0.864164	0.003064	-282.037
Ethiopian1	Direkli4	Semnan3	68901	1018793	-0.873308	-0.873308	0.00301575	-289.582
Sudanese6	Direkli4	Semnan3	69626	1015530	-0.871676	-0.871676	0.00290664	-299.891
Nigerian2	Direkli4	Semnan3	68688	1009958	-0.87264	-0.87264	0.00303398	-287.623
Aerbasi1	Direkli4	Semnan3	47512	789850	-0.88652	-0.88652	0.00271471	-326.562
Alashan3	Direkli4	Semnan3	59615	976670	-0.884945	-0.884945	0.00274941	-321.867
CHIR1	Direkli4	Semnan3	67852	1051325	-0.878747	-0.878747	0.0029738	-295.496
Bangladeshi7	Direkli4	Semnan3	63976	1057581	-0.885916	-0.885916	0.00276234	-320.711
Bangladeshi2	Direkli4	Semnan3	64177	1057213	-0.88554	-0.88554	0.00269743	-328.29
Pakistani3	Direkli4	Semnan3	66055	1049243	-0.881547	-0.881547	0.00282012	-312.592
Swiss2	Direkli4	Semnan3	71458	1006165	-0.867379	-0.867379	0.00304063	-285.263
IOG	Direkli4	Semnan3	71281	1008536	-0.867976	-0.867976	0.00300005	-289.32
French6	Direkli4	Semnan3	69822	1006306	-0.870235	-0.870235	0.00306459	-283.964
Dutch1	Direkli4	Semnan3	68472	1007529	-0.872729	-0.872729	0.00297062	-293.787
Italian1	Direkli4	Semnan3	70109	1006783	-0.869794	-0.869794	0.00303867	-286.241
French2	Direkli4	Semnan3	70295	1007485	-0.869556	-0.869556	0.00306514	-283.692
AlborzBezoar3	Direkli4	Semnan3	67730	1007581	-0.874027	-0.874027	0.00302036	-289.379
AlborzBezoar2	Direkli4	Semnan3	68481	1010908	-0.873112	-0.873112	0.00303646	-287.543
ZagrosBezoar2	Direkli4	Semnan3	68024	1016143	-0.874514	-0.874514	0.00298841	-292.635
ZagrosBezoar3	Direkli4	Semnan3	67716	1016776	-0.875119	-0.875119	0.00297796	-293.865
AlborzBezoar4	Direkli4	Semnan3	68300	1010264	-0.87335	-0.87335	0.00304991	-286.353
AzerbaijanBezoar1	Direkli4	Semnan3	68277	1005230	-0.872796	-0.872796	0.00302619	-288.415
ZagrosBezoar4	Direkli4	Semnan3	66812	1010856	-0.876006	-0.876006	0.00294022	-297.939
AzerbaijanBezoar5	Direkli4	Semnan3	67738	1001999	-0.873356	-0.873356	0.00302631	-288.587
AzerbaijanBezoar6	Direkli4	Semnan3	67660	1002671	-0.873572	-0.873572	0.00303092	-288.22
MarkaziBezoar1	Direkli4	Semnan3	68500	1022506	-0.874428	-0.874428	0.00300749	-290.75
AzerbaijanBezoar10	Direkli4	Semnan3	68639	1005383	-0.872183	-0.872183	0.00304902	-286.054
AlborzBezoar1	Direkli4	Semnan3	68296	1006256	-0.872885	-0.872885	0.00303629	-287.484
AlborzBezoar5	Direkli4	Semnan3	68476	1010177	-0.873034	-0.873034	0.00303789	-287.382
AlborzBezoar6	Direkli4	Semnan3	68690	1006244	-0.872197	-0.872197	0.00298168	-292.519
MarkaziBezoar2	Direkli4	Semnan3	70113	1025157	-0.871971	-0.871971	0.00307321	-283.733
MarkaziBezoar3	Direkli4	Semnan3	68982	1023614	-0.873728	-0.873728	0.00297208	-293.979
Iranian11	Direkli4	Semnan3	67715	1029346	-0.876552	-0.876552	0.00294112	-298.034
Iranian16	Direkli4	Semnan3	67700	1029453	-0.87659	-0.87659	0.00296009	-296.137
Iranian18	Direkli4	Semnan3	67554	1029358	-0.876829	-0.876829	0.00288683	-303.734
Iranian19	Direkli4	Semnan3	66761	1030381	-0.8783	-0.8783	0.0029179	-301.004
Iranian4	Direkli4	Semnan3	67150	1028380	-0.877411	-0.877411	0.00287211	-305.493
Iranian22	Direkli4	Semnan3	67823	1028564	-0.876279	-0.876279	0.00295034	-297.009
Iranian21	Direkli4	Semnan3	65792	1034626	-0.880424	-0.880424	0.00288376	-305.304
Abdul4	Direkli4	Moroccan8	58292	864423	-0.873651	-0.873651	0.00301764	-289.515
Blagotin3	Direkli4	Moroccan8	67142	1031377	-0.877759	-0.877759	0.00300905	-291.707
Direkli1-2	Direkli4	Moroccan8	70452	1004084	-0.86887	-0.86887	0.00318584	-272.729
Direkli5	Direkli4	Moroccan8	13525	216726	-0.88252	-0.88252	0.00295456	-298.697
Direkli6	Direkli4	Moroccan8	57252	877016	-0.87744	-0.87744	0.00299028	-293.431
Hovk1	Direkli4	Moroccan8	62222	920542	-0.873374	-0.873374	0.00319013	-273.774
Semnan3	Direkli4	Moroccan8	73563	1014869	-0.864828	-0.864828	0.00323022	-267.73
Moroccan3	Direkli4	Moroccan8	59960	1083801	-0.895153	-0.895153	0.00258075	-346.858
Tog	Direkli4	Moroccan8	64041	1090519	-0.889064	-0.889064	0.00258247	-344.269
Ethiopian1	Direkli4	Moroccan8	62268	1072193	-0.890224	-0.890224	0.00269498	-330.327
Sudanese6	Direkli4	Moroccan8	62087	1074416	-0.89074	-0.89074	0.00257663	-345.7
Nigerian2	Direkli4	Moroccan8	59564	1085612	-0.895974	-0.895974	0.00259414	-345.384
Aerbasi1	Direkli4	Moroccan8	49022	782711	-0.882121	-0.882121	0.00289206	-305.015
Alashan3	Direkli4	Moroccan8	61267	968563	-0.881015	-0.881015	0.00287691	-306.236
CHIR1	Direkli4	Moroccan8	72658	1028462	-0.868029	-0.868029	0.00323749	-268.118
Bangladeshi7	Direkli4	Moroccan8	69390	1025896	-0.873293	-0.873293	0.00306188	-285.214
Bangladeshi2	Direkli4	Moroccan8	69634	1026233	-0.872915	-0.872915	0.00304719	-286.465
Pakistani3	Direkli4	Moroccan8	69802	1030859	-0.873163	-0.873163	0.00308596	-282.947
Swiss2	Direkli4	Moroccan8	66832	1050260	-0.880347	-0.880347	0.00284152	-309.816
IOG	Direkli4	Moroccan8	66638	1049485	-0.88059	-0.88059	0.00283478	-310.638
French6	Direkli4	Moroccan8	63715	1059622	-0.886561	-0.886561	0.00279746	-316.916
Dutch1	Direkli4	Moroccan8	64143	1046494	-0.884493	-0.884493	0.0027825	-317.877
Italian1	Direkli4	Moroccan8	65060	1051130	-0.883425	-0.883425	0.00280975	-314.414
French2	Direkli4	Moroccan8	64843	1052079	-0.88389	-0.88389	0.00282716	-312.643
AlborzBezoar3	Direkli4	Moroccan8	69155	1006023	-0.871361	-0.871361	0.00315318	-276.343
AlborzBezoar2	Direkli4	Moroccan8	70333	1008680	-0.869635	-0.869635	0.00320054	-271.715
ZagrosBezoar2	Direkli4	Moroccan8	70745	1009105	-0.868973	-0.868973	0.00319976	-271.574
ZagrosBezoar3	Direkli4	Moroccan8	70421	1010547	-0.869707	-0.869707	0.00318639	-272.944
AlborzBezoar4	Direkli4	Moroccan8	69469	1010167	-0.87131	-0.87131	0.00318241	-273.79
AzerbaijanBezoar1	Direkli4	Moroccan8	69101	1009011	-0.871811	-0.871811	0.00316514	-275.442
ZagrosBezoar4	Direkli4	Moroccan8	69123	1005467	-0.87135	-0.87135	0.00312139	-279.154
AzerbaijanBezoar5	Direkli4	Moroccan8	68343	1007384	-0.872936	-0.872936	0.0030837	-283.081
AzerbaijanBezoar6	Direkli4	Moroccan8	68016	1008194	-0.873601	-0.873601	0.00311073	-280.834
MarkaziBezoar1	Direkli4	Moroccan8	71427	1012709	-0.868232	-0.868232	0.00318798	-272.346
AzerbaijanBezoar10	Direkli4	Moroccan8	69464	1009829	-0.871279	-0.871279	0.00318498	-273.558
AlborzBezoar1	Direkli4	Moroccan8	70106	1004911	-0.869572	-0.869572	0.00317997	-273.453
AlborzBezoar5	Direkli4	Moroccan8	70008	1010060	-0.870364	-0.870364	0.00319316	-272.571
AlborzBezoar6	Direkli4	Moroccan8	70189	1005788	-0.869534	-0.869534	0.00315291	-275.788
MarkaziBezoar2	Direkli4	Moroccan8	73452	1012242	-0.864691	-0.864691	0.00330011	-262.019
MarkaziBezoar3	Direkli4	Moroccan8	71996	1012008	-0.867166	-0.867166	0.00318431	-272.325
Iranian11	Direkli4	Moroccan8	66903	1044111	-0.879564	-0.879564	0.00297953	-295.202
Iranian16	Direkli4	Moroccan8	66514	1046865	-0.880519	-0.880519	0.00301657	-291.894
Iranian18	Direkli4	Moroccan8	66230	1045981	-0.880904	-0.880904	0.00288019	-305.85
Iranian19	Direkli4	Moroccan8	65977	1046406	-0.881377	-0.881377	0.00297438	-296.323
Iranian4	Direkli4	Moroccan8	65741	1046846	-0.881823	-0.881823	0.00288147	-306.033
Iranian22	Direkli4	Moroccan8	66387	1044691	-0.8805	-0.8805	0.00294561	-298.92
Iranian21	Direkli4	Moroccan8	66921	1034525	-0.878485	-0.878485	0.00299909	-292.917
Abdul4	Direkli4	Moroccan3	58062	864908	-0.874184	-0.874184	0.00295068	-296.266
Blagotin3	Direkli4	Moroccan3	67471	1027232	-0.876732	-0.876732	0.00292245	-299.999
Direkli1-2	Direkli4	Moroccan3	70335	1003507	-0.869003	-0.869003	0.00311648	-278.842
Direkli5	Direkli4	Moroccan3	13443	215965	-0.882803	-0.882803	0.0028591	-308.769
Direkli6	Direkli4	Moroccan3	57035	876858	-0.877855	-0.877855	0.0028897	-303.788
Hovk1	Direkli4	Moroccan3	62313	919274	-0.873036	-0.873036	0.00309975	-281.648
Semnan3	Direkli4	Moroccan3	73430	1014135	-0.864964	-0.864964	0.00324626	-266.449
Moroccan8	Direkli4	Moroccan3	59723	1083801	-0.895546	-0.895546	0.00251406	-356.216
Tog	Direkli4	Moroccan3	62484	1101518	-0.892639	-0.892639	0.00246025	-362.824
Ethiopian1	Direkli4	Moroccan3	61079	1078297	-0.892785	-0.892785	0.00261689	-341.162
Sudanese6	Direkli4	Moroccan3	61206	1080203	-0.892754	-0.892754	0.00246755	-361.797
Nigerian2	Direkli4	Moroccan3	57543	1096467	-0.900273	-0.900273	0.00239978	-375.149
Aerbasi1	Direkli4	Moroccan3	48863	782481	-0.882448	-0.882448	0.00280026	-315.131
Alashan3	Direkli4	Moroccan3	61357	968043	-0.880791	-0.880791	0.00283965	-310.176
CHIR1	Direkli4	Moroccan3	72571	1028873	-0.868226	-0.868226	0.00321348	-270.182
Bangladeshi7	Direkli4	Moroccan3	68674	1025635	-0.874489	-0.874489	0.00300354	-291.153
Bangladeshi2	Direkli4	Moroccan3	69322	1025511	-0.873365	-0.873365	0.00301046	-290.11
Pakistani3	Direkli4	Moroccan3	69993	1029540	-0.872686	-0.872686	0.00307296	-283.989
Swiss2	Direkli4	Moroccan3	66997	1045663	-0.879573	-0.879573	0.00281448	-312.517
IOG	Direkli4	Moroccan3	66958	1044915	-0.879558	-0.879558	0.00279244	-314.978
French6	Direkli4	Moroccan3	63705	1057322	-0.886345	-0.886345	0.00276882	-320.117
Dutch1	Direkli4	Moroccan3	64055	1043981	-0.884381	-0.884381	0.00276467	-319.887
Italian1	Direkli4	Moroccan3	65330	1045982	-0.882427	-0.882427	0.00280466	-314.629
French2	Direkli4	Moroccan3	65580	1047260	-0.882139	-0.882139	0.00280015	-315.033
AlborzBezoar3	Direkli4	Moroccan3	69472	1005729	-0.870774	-0.870774	0.00307354	-283.313
AlborzBezoar2	Direkli4	Moroccan3	70213	1008271	-0.869793	-0.869793	0.00311021	-279.657
ZagrosBezoar2	Direkli4	Moroccan3	70184	1009410	-0.869981	-0.869981	0.00313437	-277.561
ZagrosBezoar3	Direkli4	Moroccan3	69847	1009829	-0.870615	-0.870615	0.00308398	-282.303
AlborzBezoar4	Direkli4	Moroccan3	69616	1008482	-0.870854	-0.870854	0.00310386	-280.571
AzerbaijanBezoar1	Direkli4	Moroccan3	68857	1008184	-0.872137	-0.872137	0.00303875	-287.005
ZagrosBezoar4	Direkli4	Moroccan3	68940	1004557	-0.87156	-0.87156	0.00308406	-282.601
AzerbaijanBezoar5	Direkli4	Moroccan3	68225	1005497	-0.872919	-0.872919	0.00299747	-291.218
AzerbaijanBezoar6	Direkli4	Moroccan3	68061	1006734	-0.873351	-0.873351	0.00304805	-286.528
MarkaziBezoar1	Direkli4	Moroccan3	71067	1012888	-0.868875	-0.868875	0.00313525	-277.131
AzerbaijanBezoar10	Direkli4	Moroccan3	69375	1008826	-0.871313	-0.871313	0.00312781	-278.57
AlborzBezoar1	Direkli4	Moroccan3	69635	1004492	-0.870341	-0.870341	0.0030927	-281.418
AlborzBezoar5	Direkli4	Moroccan3	70007	1008421	-0.870168	-0.870168	0.00306938	-283.5
AlborzBezoar6	Direkli4	Moroccan3	70275	1005471	-0.869347	-0.869347	0.00304266	-285.719
MarkaziBezoar2	Direkli4	Moroccan3	73267	1011070	-0.864863	-0.864863	0.00321804	-268.755
MarkaziBezoar3	Direkli4	Moroccan3	71722	1011746	-0.867607	-0.867607	0.003109	-279.063
Iranian11	Direkli4	Moroccan3	66582	1044404	-0.880139	-0.880139	0.00292175	-301.237
Iranian16	Direkli4	Moroccan3	66006	1048273	-0.881527	-0.881527	0.00289101	-304.92
Iranian18	Direkli4	Moroccan3	66229	1045219	-0.880824	-0.880824	0.0028451	-309.594
Iranian19	Direkli4	Moroccan3	65589	1046659	-0.882061	-0.882061	0.00286413	-307.969
Iranian4	Direkli4	Moroccan3	65476	1046627	-0.882248	-0.882248	0.00283194	-311.535
Iranian22	Direkli4	Moroccan3	66120	1044904	-0.880975	-0.880975	0.00285161	-308.94
Iranian21	Direkli4	Moroccan3	66235	1035593	-0.879772	-0.879772	0.00288061	-305.412
Abdul4	Direkli4	Tog	58600	864340	-0.873015	-0.873015	0.00296447	-294.493
Blagotin3	Direkli4	Tog	68290	1025286	-0.875107	-0.875107	0.00291618	-300.087
Direkli1-2	Direkli4	Tog	70966	1004177	-0.867988	-0.867988	0.00309821	-280.158
Direkli5	Direkli4	Tog	13530	216274	-0.882247	-0.882247	0.00287396	-306.979
Direkli6	Direkli4	Tog	57571	876548	-0.876737	-0.876737	0.00289942	-302.384
Hovk1	Direkli4	Tog	62935	919041	-0.87182	-0.87182	0.00308224	-282.852
Semnan3	Direkli4	Tog	74106	1013945	-0.863782	-0.863782	0.00318007	-271.624
Moroccan8	Direkli4	Tog	59642	1090519	-0.896289	-0.896289	0.00247631	-361.945
Moroccan3	Direkli4	Tog	58301	1101518	-0.899465	-0.899465	0.00240857	-373.444
Ethiopian1	Direkli4	Tog	60914	1083241	-0.893521	-0.893521	0.00259445	-344.398
Sudanese6	Direkli4	Tog	60525	1089616	-0.894752	-0.894752	0.00242433	-369.073
Nigerian2	Direkli4	Tog	54758	1124605	-0.90714	-0.90714	0.00225376	-402.501
Aerbasi1	Direkli4	Tog	49771	780188	-0.880064	-0.880064	0.00288833	-304.696
Alashan3	Direkli4	Tog	62187	964771	-0.878891	-0.878891	0.0028409	-309.371
CHIR1	Direkli4	Tog	73495	1027081	-0.866443	-0.866443	0.00321145	-269.798
Bangladeshi7	Direkli4	Tog	69832	1023793	-0.872293	-0.872293	0.00300887	-289.907
Bangladeshi2	Direkli4	Tog	69812	1024905	-0.872456	-0.872456	0.00297689	-293.077
Pakistani3	Direkli4	Tog	70921	1027992	-0.870925	-0.870925	0.00305612	-284.978
Swiss2	Direkli4	Tog	67793	1044300	-0.87808	-0.87808	0.00284356	-308.796
IOG	Direkli4	Tog	67825	1042710	-0.877852	-0.877852	0.00282855	-310.355
French6	Direkli4	Tog	64209	1057343	-0.8855	-0.8855	0.00277769	-318.79
Dutch1	Direkli4	Tog	64634	1044595	-0.883461	-0.883461	0.00279107	-316.531
Italian1	Direkli4	Tog	66091	1045130	-0.881048	-0.881048	0.00280879	-313.676
French2	Direkli4	Tog	66419	1044662	-0.880443	-0.880443	0.00284012	-310.002
AlborzBezoar3	Direkli4	Tog	70226	1004286	-0.869288	-0.869288	0.00309459	-280.906
AlborzBezoar2	Direkli4	Tog	71077	1007604	-0.868215	-0.868215	0.00315048	-275.582
ZagrosBezoar2	Direkli4	Tog	71452	1007671	-0.867574	-0.867574	0.00314873	-275.532
ZagrosBezoar3	Direkli4	Tog	70761	1008472	-0.868868	-0.868868	0.00309737	-280.518
AlborzBezoar4	Direkli4	Tog	70608	1007905	-0.869064	-0.869064	0.00315557	-275.406
AzerbaijanBezoar1	Direkli4	Tog	69739	1007690	-0.870545	-0.870545	0.00309627	-281.159
ZagrosBezoar4	Direkli4	Tog	69602	1002949	-0.870212	-0.870212	0.00306494	-283.925
AzerbaijanBezoar5	Direkli4	Tog	69242	1004288	-0.871001	-0.871001	0.00304144	-286.378
AzerbaijanBezoar6	Direkli4	Tog	68871	1005935	-0.871845	-0.871845	0.00306576	-284.381
MarkaziBezoar1	Direkli4	Tog	71942	1011495	-0.867197	-0.867197	0.00314261	-275.948
AzerbaijanBezoar10	Direkli4	Tog	70579	1007882	-0.869112	-0.869112	0.00312011	-278.552
AlborzBezoar1	Direkli4	Tog	70759	1003154	-0.868222	-0.868222	0.00314204	-276.324
AlborzBezoar5	Direkli4	Tog	70970	1008144	-0.868466	-0.868466	0.003123	-278.087
AlborzBezoar6	Direkli4	Tog	71027	1003225	-0.867765	-0.867765	0.0031057	-279.41
MarkaziBezoar2	Direkli4	Tog	74234	1010596	-0.863142	-0.863142	0.003209	-268.976
MarkaziBezoar3	Direkli4	Tog	73066	1010291	-0.865112	-0.865112	0.00315691	-274.038
Iranian11	Direkli4	Tog	67564	1042648	-0.878286	-0.878286	0.00290547	-302.287
Iranian16	Direkli4	Tog	66914	1047279	-0.879888	-0.879888	0.00295386	-297.877
Iranian18	Direkli4	Tog	66866	1044928	-0.879715	-0.879715	0.0028331	-310.513
Iranian19	Direkli4	Tog	66263	1045330	-0.880778	-0.880778	0.00282934	-311.301
Iranian4	Direkli4	Tog	66440	1044605	-0.880401	-0.880401	0.00278896	-315.674
Iranian22	Direkli4	Tog	67180	1044352	-0.879122	-0.879122	0.00289148	-304.039
Iranian21	Direkli4	Tog	67466	1032908	-0.877376	-0.877376	0.00288902	-303.693
Abdul4	Direkli4	Ethiopian1	57431	865482	-0.875544	-0.875544	0.00287817	-304.202
Blagotin3	Direkli4	Ethiopian1	68296	1017184	-0.874164	-0.874164	0.00295633	-295.692
Direkli1-2	Direkli4	Ethiopian1	69744	1001022	-0.869731	-0.869731	0.00302671	-287.352
Direkli5	Direkli4	Ethiopian1	13320	215656	-0.883656	-0.883656	0.00286018	-308.951
Direkli6	Direkli4	Ethiopian1	56774	874689	-0.878097	-0.878097	0.00290416	-302.359
Hovk1	Direkli4	Ethiopian1	61705	918349	-0.874078	-0.874078	0.00303229	-288.257
Semnan3	Direkli4	Ethiopian1	72268	1018793	-0.867527	-0.867527	0.00309923	-279.917
Moroccan8	Direkli4	Ethiopian1	60936	1072193	-0.892447	-0.892447	0.00252066	-354.053
Moroccan3	Direkli4	Ethiopian1	59983	1078297	-0.894608	-0.894608	0.00250819	-356.675
Tog	Direkli4	Ethiopian1	63995	1083241	-0.888436	-0.888436	0.00253902	-349.913
Sudanese6	Direkli4	Ethiopian1	59778	1088593	-0.895891	-0.895891	0.00238362	-375.852
Nigerian2	Direkli4	Ethiopian1	59423	1080397	-0.895733	-0.895733	0.00247438	-362.002
Aerbasi1	Direkli4	Ethiopian1	48111	785856	-0.884621	-0.884621	0.00273452	-323.501
Alashan3	Direkli4	Ethiopian1	60265	971392	-0.883169	-0.883169	0.0027518	-320.943
CHIR1	Direkli4	Ethiopian1	71403	1033056	-0.8707	-0.8707	0.00308365	-282.36
Bangladeshi7	Direkli4	Ethiopian1	67444	1030702	-0.877167	-0.877167	0.0028698	-305.654
Bangladeshi2	Direkli4	Ethiopian1	67955	1030323	-0.876252	-0.876252	0.00287062	-305.248
Pakistani3	Direkli4	Ethiopian1	68523	1035084	-0.87582	-0.87582	0.00290359	-301.633
Swiss2	Direkli4	Ethiopian1	67590	1035082	-0.877407	-0.877407	0.00279428	-314.002
IOG	Direkli4	Ethiopian1	67570	1033843	-0.877303	-0.877303	0.00281341	-311.829
French6	Direkli4	Ethiopian1	64875	1044358	-0.883027	-0.883027	0.00278388	-317.193
Dutch1	Direkli4	Ethiopian1	64584	1035906	-0.882627	-0.882627	0.00275129	-320.805
Italian1	Direkli4	Ethiopian1	66185	1036029	-0.879905	-0.879905	0.0027695	-317.713
French2	Direkli4	Ethiopian1	66108	1037148	-0.880158	-0.880158	0.00275586	-319.377
AlborzBezoar3	Direkli4	Ethiopian1	68551	1005635	-0.872367	-0.872367	0.00300234	-290.562
AlborzBezoar2	Direkli4	Ethiopian1	69289	1009278	-0.871517	-0.871517	0.0030291	-287.714
ZagrosBezoar2	Direkli4	Ethiopian1	69838	1010527	-0.870714	-0.870714	0.00302599	-287.745
ZagrosBezoar3	Direkli4	Ethiopian1	69418	1011632	-0.871573	-0.871573	0.00305107	-285.662
AlborzBezoar4	Direkli4	Ethiopian1	68602	1010302	-0.87283	-0.87283	0.00300757	-290.211
AzerbaijanBezoar1	Direkli4	Ethiopian1	68333	1009102	-0.873156	-0.873156	0.00301057	-290.031
ZagrosBezoar4	Direkli4	Ethiopian1	68198	1006694	-0.873107	-0.873107	0.00297521	-293.461
AzerbaijanBezoar5	Direkli4	Ethiopian1	67549	1005651	-0.874117	-0.874117	0.00293272	-298.057
AzerbaijanBezoar6	Direkli4	Ethiopian1	67303	1006712	-0.87467	-0.87467	0.00297714	-293.796
MarkaziBezoar1	Direkli4	Ethiopian1	70348	1014684	-0.87033	-0.87033	0.0030669	-283.782
AzerbaijanBezoar10	Direkli4	Ethiopian1	68592	1008701	-0.872659	-0.872659	0.0030233	-288.645
AlborzBezoar1	Direkli4	Ethiopian1	68782	1005397	-0.871936	-0.871936	0.00301104	-289.58
AlborzBezoar5	Direkli4	Ethiopian1	69027	1009737	-0.872026	-0.872026	0.00300127	-290.552
AlborzBezoar6	Direkli4	Ethiopian1	69078	1005835	-0.871472	-0.871472	0.00298022	-292.419
MarkaziBezoar2	Direkli4	Ethiopian1	72320	1013695	-0.866816	-0.866816	0.00315005	-275.175
MarkaziBezoar3	Direkli4	Ethiopian1	70827	1015077	-0.869552	-0.869552	0.00300342	-289.521
Iranian11	Direkli4	Ethiopian1	65421	1048481	-0.882537	-0.882537	0.00280601	-314.517
Iranian16	Direkli4	Ethiopian1	64650	1050732	-0.884076	-0.884076	0.00278305	-317.665
Iranian18	Direkli4	Ethiopian1	64653	1050153	-0.88401	-0.88401	0.00272738	-324.124
Iranian19	Direkli4	Ethiopian1	64367	1050924	-0.884574	-0.884574	0.00271556	-325.743
Iranian4	Direkli4	Ethiopian1	64394	1051712	-0.88461	-0.88461	0.00272265	-324.908
Iranian22	Direkli4	Ethiopian1	65016	1048874	-0.883263	-0.883263	0.0027172	-325.063
Iranian21	Direkli4	Ethiopian1	65061	1041069	-0.882363	-0.882363	0.00275048	-320.804
Abdul4	Direkli4	Sudanese6	57492	864935	-0.875346	-0.875346	0.00281366	-311.106
Blagotin3	Direkli4	Sudanese6	67896	1016498	-0.874776	-0.874776	0.00298131	-293.42
Direkli1-2	Direkli4	Sudanese6	69850	999686	-0.869383	-0.869383	0.00303049	-286.878
Direkli5	Direkli4	Sudanese6	13363	215891	-0.883422	-0.883422	0.00279078	-316.55
Direkli6	Direkli4	Sudanese6	56992	873403	-0.877489	-0.877489	0.0028661	-306.162
Hovk1	Direkli4	Sudanese6	61878	917449	-0.873632	-0.873632	0.00300205	-291.011
Semnan3	Direkli4	Sudanese6	72336	1015530	-0.867013	-0.867013	0.00307267	-282.169
Moroccan8	Direkli4	Sudanese6	60096	1074416	-0.894058	-0.894058	0.00248739	-359.436
Moroccan3	Direkli4	Sudanese6	59436	1080203	-0.895693	-0.895693	0.00244498	-366.34
Tog	Direkli4	Sudanese6	62917	1089616	-0.89082	-0.89082	0.00243881	-365.268
Ethiopian1	Direkli4	Sudanese6	59142	1088593	-0.896941	-0.896941	0.0024552	-365.323
Nigerian2	Direkli4	Sudanese6	58246	1086664	-0.898252	-0.898252	0.00241864	-371.387
Aerbasi1	Direkli4	Sudanese6	48364	783075	-0.883662	-0.883662	0.00270586	-326.574
Alashan3	Direkli4	Sudanese6	60563	968440	-0.882288	-0.882288	0.00271894	-324.497
CHIR1	Direkli4	Sudanese6	71576	1029028	-0.869933	-0.869933	0.0031291	-278.014
Bangladeshi7	Direkli4	Sudanese6	67979	1027588	-0.875902	-0.875902	0.00291647	-300.33
Bangladeshi2	Direkli4	Sudanese6	68086	1028204	-0.875788	-0.875788	0.00287891	-304.209
Pakistani3	Direkli4	Sudanese6	68543	1032496	-0.875494	-0.875494	0.00289902	-301.996
Swiss2	Direkli4	Sudanese6	67293	1034342	-0.877831	-0.877831	0.00277929	-315.847
IOG	Direkli4	Sudanese6	66804	1035285	-0.878768	-0.878768	0.00272855	-322.064
French6	Direkli4	Sudanese6	64234	1045456	-0.884231	-0.884231	0.00272038	-325.04
Dutch1	Direkli4	Sudanese6	64431	1035583	-0.882854	-0.882854	0.00277006	-318.714
Italian1	Direkli4	Sudanese6	65865	1036920	-0.880548	-0.880548	0.00277471	-317.348
French2	Direkli4	Sudanese6	65872	1036886	-0.880532	-0.880532	0.0027545	-319.67
AlborzBezoar3	Direkli4	Sudanese6	68753	1003521	-0.871762	-0.871762	0.00298759	-291.795
AlborzBezoar2	Direkli4	Sudanese6	69519	1006273	-0.870757	-0.870757	0.00305619	-284.916
ZagrosBezoar2	Direkli4	Sudanese6	69472	1009057	-0.871173	-0.871173	0.00298672	-291.682
ZagrosBezoar3	Direkli4	Sudanese6	69437	1009279	-0.87126	-0.87126	0.00300705	-289.739
AlborzBezoar4	Direkli4	Sudanese6	68770	1007857	-0.872249	-0.872249	0.00298689	-292.025
AzerbaijanBezoar1	Direkli4	Sudanese6	68311	1006342	-0.872869	-0.872869	0.00294876	-296.012
ZagrosBezoar4	Direkli4	Sudanese6	67941	1004657	-0.873315	-0.873315	0.00292249	-298.826
AzerbaijanBezoar5	Direkli4	Sudanese6	67811	1003562	-0.873413	-0.873413	0.00291747	-299.374
AzerbaijanBezoar6	Direkli4	Sudanese6	67619	1005127	-0.873933	-0.873933	0.00294198	-297.056
MarkaziBezoar1	Direkli4	Sudanese6	70368	1012284	-0.870008	-0.870008	0.00300401	-289.615
AzerbaijanBezoar10	Direkli4	Sudanese6	68907	1005836	-0.87177	-0.87177	0.00298761	-291.795
AlborzBezoar1	Direkli4	Sudanese6	69034	1003366	-0.871253	-0.871253	0.00299613	-290.793
AlborzBezoar5	Direkli4	Sudanese6	69167	1007613	-0.87153	-0.87153	0.00299252	-291.236
AlborzBezoar6	Direkli4	Sudanese6	69648	1002904	-0.870127	-0.870127	0.00299848	-290.189
MarkaziBezoar2	Direkli4	Sudanese6	72154	1012792	-0.866991	-0.866991	0.0030731	-282.122
MarkaziBezoar3	Direkli4	Sudanese6	70689	1012278	-0.869453	-0.869453	0.0029827	-291.499
Iranian11	Direkli4	Sudanese6	65359	1046878	-0.882473	-0.882473	0.00275872	-319.885
Iranian16	Direkli4	Sudanese6	65130	1048815	-0.883064	-0.883064	0.0027404	-322.24
Iranian18	Direkli4	Sudanese6	65079	1046683	-0.882926	-0.882926	0.0027115	-325.623
Iranian19	Direkli4	Sudanese6	64489	1048216	-0.884086	-0.884086	0.00274816	-321.701
Iranian4	Direkli4	Sudanese6	64424	1049568	-0.884337	-0.884337	0.00271336	-325.92
Iranian22	Direkli4	Sudanese6	65087	1046921	-0.882938	-0.882938	0.00277965	-317.643
Iranian21	Direkli4	Sudanese6	65353	1037152	-0.881446	-0.881446	0.0027554	-319.898
Abdul4	Direkli4	Nigerian2	57929	861013	-0.873922	-0.873922	0.00293745	-297.511
Blagotin3	Direkli4	Nigerian2	66956	1021677	-0.876991	-0.876991	0.00294069	-298.226
Direkli1-2	Direkli4	Nigerian2	69819	1000031	-0.869479	-0.869479	0.00310448	-280.072
Direkli5	Direkli4	Nigerian2	13496	215475	-0.882116	-0.882116	0.00292172	-301.916
Direkli6	Direkli4	Nigerian2	56726	874064	-0.878112	-0.878112	0.00290287	-302.498
Hovk1	Direkli4	Nigerian2	62029	916418	-0.873209	-0.873209	0.00308546	-283.008
Semnan3	Direkli4	Nigerian2	72935	1009958	-0.865296	-0.865296	0.00319211	-271.074
Moroccan8	Direkli4	Nigerian2	59242	1085612	-0.896507	-0.896507	0.00252774	-354.668
Moroccan3	Direkli4	Nigerian2	57354	1096467	-0.900584	-0.900584	0.00239052	-376.731
Tog	Direkli4	Nigerian2	58723	1124605	-0.900749	-0.900749	0.00229364	-392.716
Ethiopian1	Direkli4	Nigerian2	60377	1080397	-0.894147	-0.894147	0.00256069	-349.182
Sudanese6	Direkli4	Nigerian2	59868	1086664	-0.895567	-0.895567	0.00243983	-367.061
Aerbasi1	Direkli4	Nigerian2	49008	778409	-0.88154	-0.88154	0.00285457	-308.817
Alashan3	Direkli4	Nigerian2	61393	962043	-0.880026	-0.880026	0.00280896	-313.293
CHIR1	Direkli4	Nigerian2	72337	1022798	-0.867894	-0.867894	0.00318204	-272.748
Bangladeshi7	Direkli4	Nigerian2	68927	1020008	-0.873405	-0.873405	0.00299921	-291.212
Bangladeshi2	Direkli4	Nigerian2	69271	1020683	-0.872892	-0.872892	0.00300601	-290.382
Pakistani3	Direkli4	Nigerian2	69891	1023429	-0.872149	-0.872149	0.00307122	-283.974
Swiss2	Direkli4	Nigerian2	67138	1038748	-0.878581	-0.878581	0.00288775	-304.244
IOG	Direkli4	Nigerian2	66854	1037177	-0.878891	-0.878891	0.00281763	-311.925
French6	Direkli4	Nigerian2	63150	1054168	-0.886961	-0.886961	0.00275173	-322.329
Dutch1	Direkli4	Nigerian2	63568	1042276	-0.885033	-0.885033	0.00277996	-318.361
Italian1	Direkli4	Nigerian2	65124	1040940	-0.882242	-0.882242	0.00279211	-315.977
French2	Direkli4	Nigerian2	65054	1041870	-0.88246	-0.88246	0.00277786	-317.676
AlborzBezoar3	Direkli4	Nigerian2	68963	1001710	-0.871178	-0.871178	0.00306676	-284.071
AlborzBezoar2	Direkli4	Nigerian2	69764	1004460	-0.870113	-0.870113	0.00312503	-278.434
ZagrosBezoar2	Direkli4	Nigerian2	69980	1004870	-0.869787	-0.869787	0.00310454	-280.166
ZagrosBezoar3	Direkli4	Nigerian2	69884	1005854	-0.870073	-0.870073	0.00310792	-279.954
AlborzBezoar4	Direkli4	Nigerian2	69143	1005076	-0.871268	-0.871268	0.00312663	-278.661
AzerbaijanBezoar1	Direkli4	Nigerian2	68517	1004870	-0.872335	-0.872335	0.00309366	-281.975
ZagrosBezoar4	Direkli4	Nigerian2	68727	1001120	-0.87152	-0.87152	0.00306743	-284.12
AzerbaijanBezoar5	Direkli4	Nigerian2	68027	1001951	-0.872844	-0.872844	0.0030469	-286.469
AzerbaijanBezoar6	Direkli4	Nigerian2	67656	1003755	-0.873707	-0.873707	0.00304309	-287.112
MarkaziBezoar1	Direkli4	Nigerian2	70749	1008425	-0.868883	-0.868883	0.00312154	-278.351
AzerbaijanBezoar10	Direkli4	Nigerian2	69100	1004965	-0.87133	-0.87133	0.00308693	-282.264
AlborzBezoar1	Direkli4	Nigerian2	69344	1000473	-0.870363	-0.870363	0.00308221	-282.383
AlborzBezoar5	Direkli4	Nigerian2	69668	1005196	-0.870369	-0.870369	0.00308938	-281.729
AlborzBezoar6	Direkli4	Nigerian2	70004	1000626	-0.869228	-0.869228	0.00304819	-285.162
MarkaziBezoar2	Direkli4	Nigerian2	72972	1007357	-0.864908	-0.864908	0.00318723	-271.367
MarkaziBezoar3	Direkli4	Nigerian2	71677	1007835	-0.867205	-0.867205	0.00313974	-276.203
Iranian11	Direkli4	Nigerian2	66365	1038751	-0.879895	-0.879895	0.0028936	-304.083
Iranian16	Direkli4	Nigerian2	66083	1041860	-0.88071	-0.88071	0.00293726	-299.841
Iranian18	Direkli4	Nigerian2	65879	1041221	-0.880988	-0.880988	0.00281526	-312.933
Iranian19	Direkli4	Nigerian2	65414	1041573	-0.881816	-0.881816	0.00285903	-308.432
Iranian4	Direkli4	Nigerian2	65443	1041146	-0.881721	-0.881721	0.00283982	-310.485
Iranian22	Direkli4	Nigerian2	66039	1040442	-0.880632	-0.880632	0.00285435	-308.523
Iranian21	Direkli4	Nigerian2	66523	1029227	-0.87858	-0.87858	0.002894	-303.587
Abdul4	Direkli4	Aerbasi1	39409	662554	-0.887718	-0.887718	0.00251598	-352.832
Blagotin3	Direkli4	Aerbasi1	49255	761264	-0.878461	-0.878461	0.00275658	-318.678
Direkli1-2	Direkli4	Aerbasi1	49580	753219	-0.876482	-0.876482	0.00283136	-309.562
Direkli5	Direkli4	Aerbasi1	9728	163865	-0.887922	-0.887922	0.0028016	-316.934
Direkli6	Direkli4	Aerbasi1	40702	659502	-0.883742	-0.883742	0.00266817	-331.217
Hovk1	Direkli4	Aerbasi1	43666	697694	-0.8822	-0.8822	0.00281317	-313.597
Semnan3	Direkli4	Aerbasi1	47839	789850	-0.885783	-0.885783	0.0025897	-342.041
Moroccan8	Direkli4	Aerbasi1	46189	782711	-0.888553	-0.888553	0.00255312	-348.026
Moroccan3	Direkli4	Aerbasi1	46369	782481	-0.888112	-0.888112	0.00254348	-349.172
Tog	Direkli4	Aerbasi1	50082	780188	-0.87936	-0.87936	0.00267256	-329.033
Ethiopian1	Direkli4	Aerbasi1	46533	785856	-0.888194	-0.888194	0.00258453	-343.658
Sudanese6	Direkli4	Aerbasi1	47133	783075	-0.886455	-0.886455	0.00247128	-358.704
Nigerian2	Direkli4	Aerbasi1	46597	778409	-0.887038	-0.887038	0.00259199	-342.223
Alashan3	Direkli4	Aerbasi1	39533	761814	-0.901334	-0.901334	0.00230946	-390.279
CHIR1	Direkli4	Aerbasi1	45179	816602	-0.89515	-0.89515	0.00252908	-353.943
Bangladeshi7	Direkli4	Aerbasi1	44662	803560	-0.894693	-0.894693	0.00248498	-360.04
Bangladeshi2	Direkli4	Aerbasi1	44860	803726	-0.894271	-0.894271	0.00241269	-370.653
Pakistani3	Direkli4	Aerbasi1	45715	803147	-0.892291	-0.892291	0.00251703	-354.502
Swiss2	Direkli4	Aerbasi1	48805	774174	-0.881394	-0.881394	0.00265013	-332.585
IOG	Direkli4	Aerbasi1	48147	775852	-0.883138	-0.883138	0.00262159	-336.872
French6	Direkli4	Aerbasi1	47029	775673	-0.885672	-0.885672	0.00260262	-340.3
Dutch1	Direkli4	Aerbasi1	46451	777101	-0.887193	-0.887193	0.00258964	-342.593
Italian1	Direkli4	Aerbasi1	47859	775709	-0.883776	-0.883776	0.00262293	-336.943
French2	Direkli4	Aerbasi1	47669	775967	-0.884247	-0.884247	0.00260595	-339.319
AlborzBezoar3	Direkli4	Aerbasi1	47694	765223	-0.88266	-0.88266	0.00271431	-325.187
AlborzBezoar2	Direkli4	Aerbasi1	48093	766706	-0.881951	-0.881951	0.00277747	-317.538
ZagrosBezoar2	Direkli4	Aerbasi1	47845	772663	-0.883377	-0.883377	0.00270172	-326.968
ZagrosBezoar3	Direkli4	Aerbasi1	47377	773091	-0.884512	-0.884512	0.00267775	-330.319
AlborzBezoar4	Direkli4	Aerbasi1	47562	768150	-0.883385	-0.883385	0.00270031	-327.142
AzerbaijanBezoar1	Direkli4	Aerbasi1	47863	764175	-0.882116	-0.882116	0.00276994	-318.461
ZagrosBezoar4	Direkli4	Aerbasi1	46833	769842	-0.885308	-0.885308	0.00264523	-334.681
AzerbaijanBezoar5	Direkli4	Aerbasi1	47502	762840	-0.882761	-0.882761	0.0027013	-326.791
AzerbaijanBezoar6	Direkli4	Aerbasi1	47325	763214	-0.883226	-0.883226	0.00270414	-326.619
MarkaziBezoar1	Direkli4	Aerbasi1	47960	776505	-0.883658	-0.883658	0.00268405	-329.225
AzerbaijanBezoar10	Direkli4	Aerbasi1	47926	764295	-0.881988	-0.881988	0.00275935	-319.637
AlborzBezoar1	Direkli4	Aerbasi1	47959	764538	-0.881947	-0.881947	0.00274607	-321.167
AlborzBezoar5	Direkli4	Aerbasi1	48213	767931	-0.881852	-0.881852	0.00276837	-318.545
AlborzBezoar6	Direkli4	Aerbasi1	48302	764554	-0.881155	-0.881155	0.00274388	-321.135
MarkaziBezoar2	Direkli4	Aerbasi1	49082	777388	-0.881225	-0.881225	0.00275912	-319.386
MarkaziBezoar3	Direkli4	Aerbasi1	48468	777188	-0.882595	-0.882595	0.00266521	-331.154
Iranian11	Direkli4	Aerbasi1	45484	793892	-0.891624	-0.891624	0.00253728	-351.409
Iranian16	Direkli4	Aerbasi1	45515	795213	-0.891725	-0.891725	0.00251479	-354.592
Iranian18	Direkli4	Aerbasi1	45308	794888	-0.892149	-0.892149	0.00246465	-361.978
Iranian19	Direkli4	Aerbasi1	44899	795231	-0.893114	-0.893114	0.00246847	-361.808
Iranian4	Direkli4	Aerbasi1	45082	794072	-0.892554	-0.892554	0.00249213	-358.149
Iranian22	Direkli4	Aerbasi1	45700	793490	-0.891085	-0.891085	0.00255541	-348.705
Iranian21	Direkli4	Aerbasi1	44323	799474	-0.894944	-0.894944	0.00244188	-366.498
Abdul4	Direkli4	Alashan3	50308	818817	-0.884233	-0.884233	0.00266015	-332.399
Blagotin3	Direkli4	Alashan3	62081	941297	-0.876256	-0.876256	0.00293849	-298.2
Direkli1-2	Direkli4	Alashan3	62534	931404	-0.874169	-0.874169	0.002932	-298.147
Direkli5	Direkli4	Alashan3	12129	201125	-0.886248	-0.886248	0.00272603	-325.105
Direkli6	Direkli4	Alashan3	51463	813619	-0.881022	-0.881022	0.00276495	-318.639
Hovk1	Direkli4	Alashan3	54854	860591	-0.880159	-0.880159	0.00288346	-305.244
Semnan3	Direkli4	Alashan3	60750	976670	-0.882883	-0.882883	0.00274286	-321.884
Moroccan8	Direkli4	Alashan3	58235	968563	-0.88657	-0.88657	0.00262093	-338.265
Moroccan3	Direkli4	Alashan3	58450	968043	-0.886117	-0.886117	0.00265308	-333.996
Tog	Direkli4	Alashan3	63349	964771	-0.876767	-0.876767	0.00271034	-323.49
Ethiopian1	Direkli4	Alashan3	58471	971392	-0.886449	-0.886449	0.00268047	-330.707
Sudanese6	Direkli4	Alashan3	59178	968440	-0.884825	-0.884825	0.0025317	-349.499
Nigerian2	Direkli4	Alashan3	58669	962043	-0.885043	-0.885043	0.0026445	-334.673
Aerbasi1	Direkli4	Alashan3	39859	761814	-0.90056	-0.90056	0.00237697	-378.869
CHIR1	Direkli4	Alashan3	57215	1009627	-0.89274	-0.89274	0.00260985	-342.065
Bangladeshi7	Direkli4	Alashan3	56113	994516	-0.893182	-0.893182	0.00251291	-355.437
Bangladeshi2	Direkli4	Alashan3	56742	993531	-0.891948	-0.891948	0.00248884	-358.378
Pakistani3	Direkli4	Alashan3	57657	994157	-0.890366	-0.890366	0.00264022	-337.232
Swiss2	Direkli4	Alashan3	61450	956493	-0.879266	-0.879266	0.0027342	-321.581
IOG	Direkli4	Alashan3	60604	959959	-0.881234	-0.881234	0.00269688	-326.761
French6	Direkli4	Alashan3	59774	959194	-0.882677	-0.882677	0.00277501	-318.08
Dutch1	Direkli4	Alashan3	58795	960044	-0.884584	-0.884584	0.00267226	-331.025
Italian1	Direkli4	Alashan3	59858	958122	-0.882398	-0.882398	0.00271421	-325.103
French2	Direkli4	Alashan3	59904	959432	-0.882465	-0.882465	0.00272642	-323.672
AlborzBezoar3	Direkli4	Alashan3	60233	946559	-0.880347	-0.880347	0.00281057	-313.227
AlborzBezoar2	Direkli4	Alashan3	60773	947736	-0.879479	-0.879479	0.00283652	-310.056
ZagrosBezoar2	Direkli4	Alashan3	60362	954868	-0.881087	-0.881087	0.00280398	-314.228
ZagrosBezoar3	Direkli4	Alashan3	60269	955549	-0.881339	-0.881339	0.00279942	-314.829
AlborzBezoar4	Direkli4	Alashan3	60653	949697	-0.879937	-0.879937	0.00285328	-308.395
AzerbaijanBezoar1	Direkli4	Alashan3	60251	945329	-0.880167	-0.880167	0.00287161	-306.507
ZagrosBezoar4	Direkli4	Alashan3	59128	951507	-0.882988	-0.882988	0.00274671	-321.471
AzerbaijanBezoar5	Direkli4	Alashan3	59978	942909	-0.880389	-0.880389	0.00277774	-316.944
AzerbaijanBezoar6	Direkli4	Alashan3	59662	944028	-0.881115	-0.881115	0.00278101	-316.832
MarkaziBezoar1	Direkli4	Alashan3	60675	960482	-0.881164	-0.881164	0.00276845	-318.288
AzerbaijanBezoar10	Direkli4	Alashan3	60710	944923	-0.87926	-0.87926	0.00286076	-307.352
AlborzBezoar1	Direkli4	Alashan3	60698	944735	-0.87926	-0.87926	0.00287842	-305.467
AlborzBezoar5	Direkli4	Alashan3	60766	948830	-0.879623	-0.879623	0.00283784	-309.962
AlborzBezoar6	Direkli4	Alashan3	60759	945224	-0.879205	-0.879205	0.00274988	-319.725
MarkaziBezoar2	Direkli4	Alashan3	62460	961335	-0.877983	-0.877983	0.0028714	-305.768
MarkaziBezoar3	Direkli4	Alashan3	60925	961562	-0.88083	-0.88083	0.00276888	-318.118
Iranian11	Direkli4	Alashan3	57564	982115	-0.889266	-0.889266	0.00266327	-333.9
Iranian16	Direkli4	Alashan3	57417	984564	-0.889793	-0.889793	0.00262459	-339.022
Iranian18	Direkli4	Alashan3	56905	985136	-0.890782	-0.890782	0.00252557	-352.705
Iranian19	Direkli4	Alashan3	57046	983635	-0.890368	-0.890368	0.00264376	-336.781
Iranian4	Direkli4	Alashan3	57137	982065	-0.890037	-0.890037	0.00259446	-343.053
Iranian22	Direkli4	Alashan3	57510	982364	-0.88939	-0.88939	0.00260239	-341.759
Iranian21	Direkli4	Alashan3	55850	988717	-0.893066	-0.893066	0.00254637	-350.722
Abdul4	Direkli4	CHIR1	55339	873809	-0.880882	-0.880882	0.00273392	-322.204
Blagotin3	Direkli4	CHIR1	69355	1001351	-0.87045	-0.87045	0.00305893	-284.56
Direkli1-2	Direkli4	CHIR1	69715	993228	-0.868826	-0.868826	0.00307162	-282.856
Direkli5	Direkli4	CHIR1	13404	214062	-0.882145	-0.882145	0.00284899	-309.634
Direkli6	Direkli4	CHIR1	57147	866549	-0.876265	-0.876265	0.00288152	-304.098
Hovk1	Direkli4	CHIR1	60717	917533	-0.875866	-0.875866	0.00301067	-290.921
Semnan3	Direkli4	CHIR1	66058	1051325	-0.881763	-0.881763	0.00275221	-320.384
Moroccan8	Direkli4	CHIR1	66003	1028462	-0.879388	-0.879388	0.00277974	-316.356
Moroccan3	Direkli4	CHIR1	66009	1028873	-0.879423	-0.879423	0.00281219	-312.718
Tog	Direkli4	CHIR1	71215	1027081	-0.870317	-0.870317	0.00287927	-302.27
Ethiopian1	Direkli4	CHIR1	66020	1033056	-0.879863	-0.879863	0.00279008	-315.354
Sudanese6	Direkli4	CHIR1	66873	1029028	-0.877958	-0.877958	0.00272187	-322.557
Nigerian2	Direkli4	CHIR1	66069	1022798	-0.878646	-0.878646	0.00281243	-312.415
Aerbasi1	Direkli4	CHIR1	43583	816602	-0.898666	-0.898666	0.00241879	-371.536
Alashan3	Direkli4	CHIR1	54572	1009627	-0.89744	-0.89744	0.0024187	-371.042
Bangladeshi7	Direkli4	CHIR1	61144	1070855	-0.891972	-0.891972	0.00254136	-350.982
Bangladeshi2	Direkli4	CHIR1	61334	1070346	-0.891605	-0.891605	0.00253026	-352.376
Pakistani3	Direkli4	CHIR1	62908	1066958	-0.888645	-0.888645	0.00265424	-334.803
Swiss2	Direkli4	CHIR1	69319	1015677	-0.872223	-0.872223	0.00290925	-299.81
IOG	Direkli4	CHIR1	68514	1019994	-0.874114	-0.874114	0.00287982	-303.531
French6	Direkli4	CHIR1	67567	1016508	-0.875346	-0.875346	0.00293809	-297.93
Dutch1	Direkli4	CHIR1	66169	1018861	-0.878033	-0.878033	0.00283488	-309.725
Italian1	Direkli4	CHIR1	67772	1016957	-0.875043	-0.875043	0.00291068	-300.632
French2	Direkli4	CHIR1	67614	1018686	-0.875515	-0.875515	0.0028849	-303.482
AlborzBezoar3	Direkli4	CHIR1	66854	1008902	-0.875708	-0.875708	0.00288213	-303.841
AlborzBezoar2	Direkli4	CHIR1	67436	1011695	-0.875018	-0.875018	0.00292201	-299.458
ZagrosBezoar2	Direkli4	CHIR1	67077	1019341	-0.876517	-0.876517	0.00287965	-304.383
ZagrosBezoar3	Direkli4	CHIR1	66302	1020927	-0.878035	-0.878035	0.00282973	-310.289
AlborzBezoar4	Direkli4	CHIR1	67319	1012534	-0.875318	-0.875318	0.00292452	-299.303
AzerbaijanBezoar1	Direkli4	CHIR1	66875	1008319	-0.875604	-0.875604	0.00291353	-300.531
ZagrosBezoar4	Direkli4	CHIR1	65350	1015266	-0.87905	-0.87905	0.00282063	-311.651
AzerbaijanBezoar5	Direkli4	CHIR1	66310	1005552	-0.876271	-0.876271	0.00287012	-305.308
AzerbaijanBezoar6	Direkli4	CHIR1	65985	1006712	-0.876974	-0.876974	0.00286848	-305.727
MarkaziBezoar1	Direkli4	CHIR1	66955	1027911	-0.877693	-0.877693	0.00284918	-308.051
AzerbaijanBezoar10	Direkli4	CHIR1	67215	1008728	-0.875058	-0.875058	0.00296321	-295.308
AlborzBezoar1	Direkli4	CHIR1	67262	1008124	-0.874906	-0.874906	0.00295667	-295.909
AlborzBezoar5	Direkli4	CHIR1	67568	1013157	-0.874958	-0.874958	0.00296207	-295.387
AlborzBezoar6	Direkli4	CHIR1	67759	1008448	-0.874078	-0.874078	0.00295065	-296.232
MarkaziBezoar2	Direkli4	CHIR1	68466	1030720	-0.875424	-0.875424	0.00293477	-298.294
MarkaziBezoar3	Direkli4	CHIR1	67654	1027941	-0.876498	-0.876498	0.0029008	-302.158
Iranian11	Direkli4	CHIR1	64457	1046449	-0.883956	-0.883956	0.0027901	-316.819
Iranian16	Direkli4	CHIR1	64398	1049557	-0.884379	-0.884379	0.00278329	-317.747
Iranian18	Direkli4	CHIR1	63935	1050215	-0.885231	-0.885231	0.00265214	-333.78
Iranian19	Direkli4	CHIR1	63647	1049546	-0.88565	-0.88565	0.00270231	-327.738
Iranian4	Direkli4	CHIR1	63694	1047009	-0.885309	-0.885309	0.00269029	-329.076
Iranian22	Direkli4	CHIR1	64767	1045455	-0.883326	-0.883326	0.00271442	-325.419
Iranian21	Direkli4	CHIR1	62148	1056143	-0.888852	-0.888852	0.00265322	-335.009
Abdul4	Direkli4	Bangladeshi7	53516	872721	-0.884444	-0.884444	0.00262555	-336.861
Blagotin3	Direkli4	Bangladeshi7	67775	996607	-0.872649	-0.872649	0.00296941	-293.88
Direkli1-2	Direkli4	Bangladeshi7	67743	989311	-0.871827	-0.871827	0.00300636	-289.994
Direkli5	Direkli4	Bangladeshi7	12928	213390	-0.885754	-0.885754	0.00276939	-319.837
Direkli6	Direkli4	Bangladeshi7	55432	864145	-0.87944	-0.87944	0.00279913	-314.183
Hovk1	Direkli4	Bangladeshi7	58939	914396	-0.878893	-0.878893	0.00288314	-304.839
Semnan3	Direkli4	Bangladeshi7	63221	1057581	-0.887186	-0.887186	0.00261989	-338.635
Moroccan8	Direkli4	Bangladeshi7	63928	1025896	-0.882682	-0.882682	0.00268112	-329.221
Moroccan3	Direkli4	Bangladeshi7	63502	1025635	-0.88339	-0.88339	0.00267673	-330.026
Tog	Direkli4	Bangladeshi7	68825	1023793	-0.874018	-0.874018	0.00275002	-317.823
Ethiopian1	Direkli4	Bangladeshi7	63387	1030702	-0.884128	-0.884128	0.00266364	-331.925
Sudanese6	Direkli4	Bangladeshi7	64528	1027588	-0.881829	-0.881829	0.00262312	-336.175
Nigerian2	Direkli4	Bangladeshi7	63888	1020008	-0.882114	-0.882114	0.00267133	-330.215
Aerbasi1	Direkli4	Bangladeshi7	43499	803560	-0.897294	-0.897294	0.00242985	-369.28
Alashan3	Direkli4	Bangladeshi7	54285	994516	-0.896482	-0.896482	0.00239877	-373.726
CHIR1	Direkli4	Bangladeshi7	62147	1070855	-0.890297	-0.890297	0.00260488	-341.78
Bangladeshi2	Direkli4	Bangladeshi7	54397	1110197	-0.906582	-0.906582	0.00215423	-420.837
Pakistani3	Direkli4	Bangladeshi7	60028	1074146	-0.894147	-0.894147	0.00250029	-357.617
Swiss2	Direkli4	Bangladeshi7	67244	1011966	-0.875383	-0.875383	0.00282532	-309.835
IOG	Direkli4	Bangladeshi7	66408	1016929	-0.877401	-0.877401	0.00277879	-315.75
French6	Direkli4	Bangladeshi7	65480	1013581	-0.878635	-0.878635	0.00286982	-306.164
Dutch1	Direkli4	Bangladeshi7	63835	1016819	-0.881859	-0.881859	0.00271672	-324.604
Italian1	Direkli4	Bangladeshi7	66014	1013823	-0.877733	-0.877733	0.00281423	-311.891
French2	Direkli4	Bangladeshi7	65517	1015528	-0.87879	-0.87879	0.00278649	-315.375
AlborzBezoar3	Direkli4	Bangladeshi7	64632	1007446	-0.879427	-0.879427	0.00279388	-314.769
AlborzBezoar2	Direkli4	Bangladeshi7	65422	1010723	-0.878414	-0.878414	0.00279509	-314.271
ZagrosBezoar2	Direkli4	Bangladeshi7	64356	1018540	-0.881141	-0.881141	0.0027786	-317.118
ZagrosBezoar3	Direkli4	Bangladeshi7	64201	1019920	-0.881561	-0.881561	0.00274236	-321.461
AlborzBezoar4	Direkli4	Bangladeshi7	64992	1010651	-0.879157	-0.879157	0.00283005	-310.651
AzerbaijanBezoar1	Direkli4	Bangladeshi7	65019	1005855	-0.878568	-0.878568	0.00287359	-305.739
ZagrosBezoar4	Direkli4	Bangladeshi7	62994	1013856	-0.883003	-0.883003	0.00269616	-327.504
AzerbaijanBezoar5	Direkli4	Bangladeshi7	64506	1003404	-0.879192	-0.879192	0.00276246	-318.265
AzerbaijanBezoar6	Direkli4	Bangladeshi7	63825	1004555	-0.88052	-0.88052	0.00277387	-317.434
MarkaziBezoar1	Direkli4	Bangladeshi7	64746	1025721	-0.881251	-0.881251	0.00276653	-318.54
AzerbaijanBezoar10	Direkli4	Bangladeshi7	65348	1006463	-0.878061	-0.878061	0.00288516	-304.337
AlborzBezoar1	Direkli4	Bangladeshi7	64871	1007184	-0.878978	-0.878978	0.00280195	-313.702
AlborzBezoar5	Direkli4	Bangladeshi7	65246	1010995	-0.878752	-0.878752	0.00281128	-312.581
AlborzBezoar6	Direkli4	Bangladeshi7	65532	1006471	-0.877739	-0.877739	0.00279115	-314.472
MarkaziBezoar2	Direkli4	Bangladeshi7	66219	1028653	-0.879038	-0.879038	0.00280929	-312.904
MarkaziBezoar3	Direkli4	Bangladeshi7	65056	1027369	-0.880896	-0.880896	0.00273356	-322.252
Iranian11	Direkli4	Bangladeshi7	62601	1044510	-0.886911	-0.886911	0.00265653	-333.861
Iranian16	Direkli4	Bangladeshi7	62314	1046352	-0.887587	-0.887587	0.00264528	-335.536
Iranian18	Direkli4	Bangladeshi7	61872	1046881	-0.888393	-0.888393	0.0025344	-350.534
Iranian19	Direkli4	Bangladeshi7	61614	1045512	-0.888696	-0.888696	0.00259907	-341.928
Iranian4	Direkli4	Bangladeshi7	61776	1044806	-0.888348	-0.888348	0.00254292	-349.342
Iranian22	Direkli4	Bangladeshi7	62475	1043066	-0.886978	-0.886978	0.00261417	-339.296
Iranian21	Direkli4	Bangladeshi7	59877	1054888	-0.892575	-0.892575	0.00251601	-354.758
Abdul4	Direkli4	Bangladeshi2	53576	872578	-0.884304	-0.884304	0.00263821	-335.191
Blagotin3	Direkli4	Bangladeshi2	67521	997278	-0.873176	-0.873176	0.00298837	-292.192
Direkli1-2	Direkli4	Bangladeshi2	67697	989683	-0.871953	-0.871953	0.00300934	-289.749
Direkli5	Direkli4	Bangladeshi2	13016	213466	-0.885059	-0.885059	0.00276988	-319.53
Direkli6	Direkli4	Bangladeshi2	55710	863945	-0.878846	-0.878846	0.00283923	-309.537
Hovk1	Direkli4	Bangladeshi2	59124	914818	-0.878588	-0.878588	0.00293482	-299.366
Semnan3	Direkli4	Bangladeshi2	63074	1057213	-0.887397	-0.887397	0.00258651	-343.087
Moroccan8	Direkli4	Bangladeshi2	63780	1026233	-0.882974	-0.882974	0.00270864	-325.985
Moroccan3	Direkli4	Bangladeshi2	63744	1025511	-0.882958	-0.882958	0.00271581	-325.118
Tog	Direkli4	Bangladeshi2	68387	1024905	-0.874897	-0.874897	0.00273814	-319.522
Ethiopian1	Direkli4	Bangladeshi2	63517	1030323	-0.883864	-0.883864	0.00269623	-327.815
Sudanese6	Direkli4	Bangladeshi2	64275	1028204	-0.882332	-0.882332	0.00261688	-337.169
Nigerian2	Direkli4	Bangladeshi2	63828	1020683	-0.882292	-0.882292	0.00270719	-325.906
Aerbasi1	Direkli4	Bangladeshi2	43392	803726	-0.897554	-0.897554	0.00240252	-373.588
Alashan3	Direkli4	Bangladeshi2	54471	993531	-0.896048	-0.896048	0.00239075	-374.798
CHIR1	Direkli4	Bangladeshi2	62001	1070346	-0.890491	-0.890491	0.00262401	-339.363
Bangladeshi7	Direkli4	Bangladeshi2	53939	1110197	-0.907332	-0.907332	0.00216898	-418.322
Pakistani3	Direkli4	Bangladeshi2	59454	1074401	-0.895129	-0.895129	0.00245135	-365.157
Swiss2	Direkli4	Bangladeshi2	67049	1012593	-0.875794	-0.875794	0.00282128	-310.425
IOG	Direkli4	Bangladeshi2	66425	1017827	-0.877473	-0.877473	0.00276695	-317.127
French6	Direkli4	Bangladeshi2	65220	1013651	-0.879096	-0.879096	0.00283271	-310.338
Dutch1	Direkli4	Bangladeshi2	63778	1018536	-0.882145	-0.882145	0.00271442	-324.985
Italian1	Direkli4	Bangladeshi2	65662	1013846	-0.878348	-0.878348	0.00280175	-313.499
French2	Direkli4	Bangladeshi2	65447	1016424	-0.879011	-0.879011	0.00277153	-317.157
AlborzBezoar3	Direkli4	Bangladeshi2	64715	1008032	-0.879347	-0.879347	0.0028079	-313.169
AlborzBezoar2	Direkli4	Bangladeshi2	65250	1010831	-0.878727	-0.878727	0.00284146	-309.252
ZagrosBezoar2	Direkli4	Bangladeshi2	64627	1017715	-0.880579	-0.880579	0.00279944	-314.556
ZagrosBezoar3	Direkli4	Bangladeshi2	64261	1018955	-0.881351	-0.881351	0.00278882	-316.03
AlborzBezoar4	Direkli4	Bangladeshi2	64846	1011081	-0.87946	-0.87946	0.00285499	-308.043
AzerbaijanBezoar1	Direkli4	Bangladeshi2	65196	1005475	-0.878215	-0.878215	0.00289558	-303.295
ZagrosBezoar4	Direkli4	Bangladeshi2	63021	1013118	-0.882876	-0.882876	0.00271696	-324.95
AzerbaijanBezoar5	Direkli4	Bangladeshi2	64480	1003044	-0.879197	-0.879197	0.00277771	-316.519
AzerbaijanBezoar6	Direkli4	Bangladeshi2	64125	1005203	-0.880065	-0.880065	0.0028377	-310.133
MarkaziBezoar1	Direkli4	Bangladeshi2	64519	1025221	-0.881588	-0.881588	0.00273007	-322.918
AzerbaijanBezoar10	Direkli4	Bangladeshi2	65501	1006290	-0.877773	-0.877773	0.00292684	-299.904
AlborzBezoar1	Direkli4	Bangladeshi2	64966	1007428	-0.878839	-0.878839	0.00284605	-308.792
AlborzBezoar5	Direkli4	Bangladeshi2	65319	1011602	-0.878693	-0.878693	0.00283875	-309.536
AlborzBezoar6	Direkli4	Bangladeshi2	65686	1007120	-0.877544	-0.877544	0.00284279	-308.691
MarkaziBezoar2	Direkli4	Bangladeshi2	66164	1029212	-0.879194	-0.879194	0.00279581	-314.469
MarkaziBezoar3	Direkli4	Bangladeshi2	65400	1026097	-0.880165	-0.880165	0.00273782	-321.483
Iranian11	Direkli4	Bangladeshi2	62231	1044279	-0.887518	-0.887518	0.00267548	-331.723
Iranian16	Direkli4	Bangladeshi2	62098	1046800	-0.888	-0.888	0.00265299	-334.717
Iranian18	Direkli4	Bangladeshi2	61849	1046235	-0.888368	-0.888368	0.00252804	-351.406
Iranian19	Direkli4	Bangladeshi2	61549	1044714	-0.888726	-0.888726	0.00262911	-338.033
Iranian4	Direkli4	Bangladeshi2	61741	1044047	-0.888331	-0.888331	0.0025909	-342.866
Iranian22	Direkli4	Bangladeshi2	62324	1042539	-0.887182	-0.887182	0.00265968	-333.567
Iranian21	Direkli4	Bangladeshi2	59813	1054581	-0.892654	-0.892654	0.00255064	-349.973
Abdul4	Direkli4	Pakistani3	54345	872311	-0.882707	-0.882707	0.0026588	-331.994
Blagotin3	Direkli4	Pakistani3	67916	999088	-0.872698	-0.872698	0.0029239	-298.47
Direkli1-2	Direkli4	Pakistani3	68357	991411	-0.870996	-0.870996	0.00297515	-292.757
Direkli5	Direkli4	Pakistani3	13127	213925	-0.88437	-0.88437	0.00272293	-324.786
Direkli6	Direkli4	Pakistani3	56153	864685	-0.878039	-0.878039	0.00280065	-313.512
Hovk1	Direkli4	Pakistani3	59608	915676	-0.877763	-0.877763	0.00291856	-300.752
Semnan3	Direkli4	Pakistani3	64762	1049243	-0.883731	-0.883731	0.00266373	-331.765
Moroccan8	Direkli4	Pakistani3	63831	1030859	-0.883381	-0.883381	0.00272451	-324.234
Moroccan3	Direkli4	Pakistani3	64299	1029540	-0.882434	-0.882434	0.00276939	-318.639
Tog	Direkli4	Pakistani3	69324	1027992	-0.873648	-0.873648	0.00279954	-312.068
Ethiopian1	Direkli4	Pakistani3	63925	1035084	-0.883668	-0.883668	0.00270466	-326.72
Sudanese6	Direkli4	Pakistani3	64630	1032496	-0.882183	-0.882183	0.00260282	-338.934
Nigerian2	Direkli4	Pakistani3	64321	1023429	-0.881736	-0.881736	0.00277434	-317.818
Aerbasi1	Direkli4	Pakistani3	44275	803147	-0.895507	-0.895507	0.00248643	-360.157
Alashan3	Direkli4	Pakistani3	55355	994157	-0.894513	-0.894513	0.00250813	-356.645
CHIR1	Direkli4	Pakistani3	63356	1066958	-0.887897	-0.887897	0.00271524	-327.005
Bangladeshi7	Direkli4	Pakistani3	59502	1074146	-0.895026	-0.895026	0.00249569	-358.629
Bangladeshi2	Direkli4	Pakistani3	59365	1074401	-0.895278	-0.895278	0.00242378	-369.372
Swiss2	Direkli4	Pakistani3	67903	1014892	-0.874578	-0.874578	0.00282192	-309.923
IOG	Direkli4	Pakistani3	67231	1017668	-0.87606	-0.87606	0.00280338	-312.501
French6	Direkli4	Pakistani3	65749	1016456	-0.878491	-0.878491	0.0027982	-313.948
Dutch1	Direkli4	Pakistani3	64743	1018385	-0.880452	-0.880452	0.0027498	-320.188
Italian1	Direkli4	Pakistani3	66264	1016447	-0.877596	-0.877596	0.00280023	-313.401
French2	Direkli4	Pakistani3	65987	1017140	-0.878155	-0.878155	0.00278136	-315.728
AlborzBezoar3	Direkli4	Pakistani3	65207	1009341	-0.878634	-0.878634	0.00279069	-314.845
AlborzBezoar2	Direkli4	Pakistani3	66076	1011622	-0.877376	-0.877376	0.00286515	-306.223
ZagrosBezoar2	Direkli4	Pakistani3	65390	1019259	-0.879426	-0.879426	0.00281422	-312.494
ZagrosBezoar3	Direkli4	Pakistani3	64996	1019434	-0.880129	-0.880129	0.00277725	-316.907
AlborzBezoar4	Direkli4	Pakistani3	65621	1011658	-0.878173	-0.878173	0.00284284	-308.906
AzerbaijanBezoar1	Direkli4	Pakistani3	65572	1007800	-0.877821	-0.877821	0.00287579	-305.245
ZagrosBezoar4	Direkli4	Pakistani3	63963	1013595	-0.881282	-0.881282	0.00275809	-319.526
AzerbaijanBezoar5	Direkli4	Pakistani3	65043	1004174	-0.878335	-0.878335	0.00283376	-309.954
AzerbaijanBezoar6	Direkli4	Pakistani3	64851	1005607	-0.878835	-0.878835	0.00281161	-312.574
MarkaziBezoar1	Direkli4	Pakistani3	65792	1026152	-0.879496	-0.879496	0.00284005	-309.676
AzerbaijanBezoar10	Direkli4	Pakistani3	66389	1007244	-0.876328	-0.876328	0.00289507	-302.696
AlborzBezoar1	Direkli4	Pakistani3	65798	1008430	-0.877497	-0.877497	0.00287802	-304.896
AlborzBezoar5	Direkli4	Pakistani3	65782	1012390	-0.877975	-0.877975	0.00287543	-305.337
AlborzBezoar6	Direkli4	Pakistani3	66310	1007899	-0.876542	-0.876542	0.00288593	-303.729
MarkaziBezoar2	Direkli4	Pakistani3	67301	1027714	-0.877077	-0.877077	0.0028598	-306.691
MarkaziBezoar3	Direkli4	Pakistani3	66092	1026713	-0.879042	-0.879042	0.00279639	-314.348
Iranian11	Direkli4	Pakistani3	62653	1049407	-0.887321	-0.887321	0.00266426	-333.046
Iranian16	Direkli4	Pakistani3	62325	1051497	-0.888088	-0.888088	0.00267491	-332.007
Iranian18	Direkli4	Pakistani3	62170	1052220	-0.888423	-0.888423	0.00258862	-343.203
Iranian19	Direkli4	Pakistani3	61859	1050007	-0.888729	-0.888729	0.00260824	-340.74
Iranian4	Direkli4	Pakistani3	62263	1048915	-0.887933	-0.887933	0.002649	-335.196
Iranian22	Direkli4	Pakistani3	62617	1048392	-0.887279	-0.887279	0.00270378	-328.162
Iranian21	Direkli4	Pakistani3	60136	1059628	-0.892592	-0.892592	0.00255538	-349.3
Abdul4	Direkli4	Swiss2	60701	858741	-0.867961	-0.867961	0.00314625	-275.872
Blagotin3	Direkli4	Swiss2	64241	1066019	-0.886325	-0.886325	0.0028194	-314.367
Direkli1-2	Direkli4	Swiss2	71282	1011975	-0.868393	-0.868393	0.00317462	-273.542
Direkli5	Direkli4	Swiss2	13790	217773	-0.880896	-0.880896	0.00299902	-293.728
Direkli6	Direkli4	Swiss2	58048	883156	-0.876652	-0.876652	0.00294778	-297.394
Hovk1	Direkli4	Swiss2	63986	922230	-0.870239	-0.870239	0.00324679	-268.03
Semnan3	Direkli4	Swiss2	76668	1006165	-0.858394	-0.858394	0.00336672	-254.964
Moroccan8	Direkli4	Swiss2	67240	1050260	-0.87966	-0.87966	0.00291146	-302.137
Moroccan3	Direkli4	Swiss2	67631	1045663	-0.878503	-0.878503	0.00296992	-295.8
Tog	Direkli4	Swiss2	72741	1044300	-0.869761	-0.869761	0.00304218	-285.901
Ethiopian1	Direkli4	Swiss2	69397	1035082	-0.874335	-0.874335	0.00303789	-287.81
Sudanese6	Direkli4	Swiss2	69729	1034342	-0.873687	-0.873687	0.00293318	-297.864
Nigerian2	Direkli4	Swiss2	67967	1038748	-0.877173	-0.877173	0.00302008	-290.447
Aerbasi1	Direkli4	Swiss2	51991	774174	-0.874139	-0.874139	0.00305021	-286.583
Alashan3	Direkli4	Swiss2	65068	956493	-0.872611	-0.872611	0.00306956	-284.278
CHIR1	Direkli4	Swiss2	76562	1015677	-0.859807	-0.859807	0.00346475	-248.159
Bangladeshi7	Direkli4	Swiss2	73035	1011966	-0.865373	-0.865373	0.00328441	-263.479
Bangladeshi2	Direkli4	Swiss2	73288	1012593	-0.865016	-0.865016	0.00325059	-266.111
Pakistani3	Direkli4	Swiss2	74304	1014892	-0.863562	-0.863562	0.00329425	-262.142
IOG	Direkli4	Swiss2	62657	1090305	-0.891311	-0.891311	0.00265605	-335.577
French6	Direkli4	Swiss2	61797	1085550	-0.892278	-0.892278	0.00270843	-329.445
Dutch1	Direkli4	Swiss2	62577	1073137	-0.889802	-0.889802	0.00273542	-325.289
Italian1	Direkli4	Swiss2	58590	1111056	-0.899816	-0.899816	0.00243031	-370.247
French2	Direkli4	Swiss2	60838	1096675	-0.894881	-0.894881	0.00264062	-338.89
AlborzBezoar3	Direkli4	Swiss2	71441	1004419	-0.867193	-0.867193	0.00323678	-267.918
AlborzBezoar2	Direkli4	Swiss2	72569	1006999	-0.865559	-0.865559	0.00329321	-262.831
ZagrosBezoar2	Direkli4	Swiss2	72988	1003467	-0.864392	-0.864392	0.00328653	-263.01
ZagrosBezoar3	Direkli4	Swiss2	72814	1004301	-0.864798	-0.864798	0.00327014	-264.453
AlborzBezoar4	Direkli4	Swiss2	72072	1008067	-0.866551	-0.866551	0.00328365	-263.899
AzerbaijanBezoar1	Direkli4	Swiss2	70941	1010272	-0.868775	-0.868775	0.00319833	-271.634
ZagrosBezoar4	Direkli4	Swiss2	71486	1000112	-0.866581	-0.866581	0.00323228	-268.102
AzerbaijanBezoar5	Direkli4	Swiss2	70576	1006733	-0.868977	-0.868977	0.0031883	-272.552
AzerbaijanBezoar6	Direkli4	Swiss2	70362	1008595	-0.869574	-0.869574	0.0031837	-273.133
MarkaziBezoar1	Direkli4	Swiss2	74463	1005273	-0.862072	-0.862072	0.00337252	-255.617
AzerbaijanBezoar10	Direkli4	Swiss2	71734	1010042	-0.867377	-0.867377	0.00326041	-266.033
AlborzBezoar1	Direkli4	Swiss2	72307	1002995	-0.865513	-0.865513	0.00328801	-263.233
AlborzBezoar5	Direkli4	Swiss2	72562	1006456	-0.865504	-0.865504	0.00327492	-264.282
AlborzBezoar6	Direkli4	Swiss2	72798	1003448	-0.864719	-0.864719	0.00327973	-263.656
MarkaziBezoar2	Direkli4	Swiss2	76939	1003296	-0.857551	-0.857551	0.00345935	-247.893
MarkaziBezoar3	Direkli4	Swiss2	75338	1004119	-0.860415	-0.860415	0.00335058	-256.796
Iranian11	Direkli4	Swiss2	71157	1026048	-0.870294	-0.870294	0.00319278	-272.582
Iranian16	Direkli4	Swiss2	70966	1028488	-0.870907	-0.870907	0.00318626	-273.332
Iranian18	Direkli4	Swiss2	70801	1028122	-0.871145	-0.871145	0.0031015	-280.879
Iranian19	Direkli4	Swiss2	70721	1028004	-0.871267	-0.871267	0.00314813	-276.757
Iranian4	Direkli4	Swiss2	70162	1028271	-0.872251	-0.872251	0.00307412	-283.74
Iranian22	Direkli4	Swiss2	71212	1027571	-0.87038	-0.87038	0.00318706	-273.098
Iranian21	Direkli4	Swiss2	71530	1016978	-0.868572	-0.868572	0.0031721	-273.817
Abdul4	Direkli4	IOG	60466	860956	-0.868755	-0.868755	0.00310984	-279.357
Blagotin3	Direkli4	IOG	64624	1065227	-0.885606	-0.885606	0.00280957	-315.21
Direkli1-2	Direkli4	IOG	71501	1012133	-0.868035	-0.868035	0.00321148	-270.292
Direkli5	Direkli4	IOG	13723	217274	-0.881185	-0.881185	0.00304484	-289.402
Direkli6	Direkli4	IOG	58281	883127	-0.876183	-0.876183	0.00301256	-290.844
Hovk1	Direkli4	IOG	64225	921803	-0.86973	-0.86973	0.00322077	-270.038
Semnan3	Direkli4	IOG	77022	1008536	-0.858097	-0.858097	0.00340235	-252.207
Moroccan8	Direkli4	IOG	67537	1049485	-0.879077	-0.879077	0.00297508	-295.48
Moroccan3	Direkli4	IOG	68039	1044915	-0.877733	-0.877733	0.00299568	-293
Tog	Direkli4	IOG	73236	1042710	-0.868746	-0.868746	0.00305671	-284.21
Ethiopian1	Direkli4	IOG	69750	1033843	-0.873595	-0.873595	0.00310229	-281.597
Sudanese6	Direkli4	IOG	69594	1035285	-0.874024	-0.874024	0.00293396	-297.899
Nigerian2	Direkli4	IOG	68117	1037177	-0.876744	-0.876744	0.00302303	-290.022
Aerbasi1	Direkli4	IOG	51720	775852	-0.875008	-0.875008	0.00310253	-282.03
Alashan3	Direkli4	IOG	64667	959959	-0.873774	-0.873774	0.00310117	-281.757
CHIR1	Direkli4	IOG	76300	1019994	-0.860804	-0.860804	0.00348658	-246.89
Bangladeshi7	Direkli4	IOG	72763	1016929	-0.866452	-0.866452	0.0033013	-262.458
Bangladeshi2	Direkli4	IOG	73169	1017827	-0.865868	-0.865868	0.00326888	-264.882
Pakistani3	Direkli4	IOG	74192	1017668	-0.8641	-0.8641	0.0033312	-259.396
Swiss2	Direkli4	IOG	63121	1090305	-0.89055	-0.89055	0.00269311	-330.677
French6	Direkli4	IOG	62185	1085797	-0.891662	-0.891662	0.00272805	-326.849
Dutch1	Direkli4	IOG	62891	1073300	-0.889295	-0.889295	0.00276539	-321.58
Italian1	Direkli4	IOG	61647	1089240	-0.892871	-0.892871	0.00257218	-347.125
French2	Direkli4	IOG	62206	1088525	-0.891884	-0.891884	0.00265496	-335.932
AlborzBezoar3	Direkli4	IOG	71929	1004617	-0.866371	-0.866371	0.0032438	-267.085
AlborzBezoar2	Direkli4	IOG	72528	1008563	-0.865824	-0.865824	0.00328308	-263.724
ZagrosBezoar2	Direkli4	IOG	73159	1004631	-0.864243	-0.864243	0.00331396	-260.788
ZagrosBezoar3	Direkli4	IOG	72842	1006117	-0.864977	-0.864977	0.00331237	-261.135
AlborzBezoar4	Direkli4	IOG	72127	1008478	-0.866506	-0.866506	0.00328816	-263.523
AzerbaijanBezoar1	Direkli4	IOG	70989	1010133	-0.868675	-0.868675	0.0032153	-270.17
ZagrosBezoar4	Direkli4	IOG	71893	1000399	-0.865908	-0.865908	0.00327507	-264.394
AzerbaijanBezoar5	Direkli4	IOG	70616	1006550	-0.868886	-0.868886	0.00316851	-274.225
AzerbaijanBezoar6	Direkli4	IOG	70061	1008811	-0.870122	-0.870122	0.00313877	-277.217
MarkaziBezoar1	Direkli4	IOG	74413	1007882	-0.86249	-0.86249	0.00337299	-255.705
AzerbaijanBezoar10	Direkli4	IOG	71781	1010576	-0.867362	-0.867362	0.00322406	-269.028
AlborzBezoar1	Direkli4	IOG	72345	1003616	-0.865525	-0.865525	0.00329423	-262.739
AlborzBezoar5	Direkli4	IOG	72957	1006663	-0.864847	-0.864847	0.00331369	-260.992
AlborzBezoar6	Direkli4	IOG	73067	1004127	-0.864338	-0.864338	0.00330384	-261.616
MarkaziBezoar2	Direkli4	IOG	76700	1006484	-0.85838	-0.85838	0.00342257	-250.8
MarkaziBezoar3	Direkli4	IOG	75304	1006118	-0.860731	-0.860731	0.00338588	-254.212
Iranian11	Direkli4	IOG	71114	1028151	-0.870615	-0.870615	0.00321752	-270.586
Iranian16	Direkli4	IOG	71062	1030493	-0.870979	-0.870979	0.00320564	-271.702
Iranian18	Direkli4	IOG	70645	1030021	-0.871632	-0.871632	0.00313507	-278.026
Iranian19	Direkli4	IOG	70496	1030151	-0.871901	-0.871901	0.00319322	-273.048
Iranian4	Direkli4	IOG	70135	1030802	-0.87259	-0.87259	0.00314368	-277.57
Iranian22	Direkli4	IOG	71081	1029012	-0.870773	-0.870773	0.00322717	-269.826
Iranian21	Direkli4	IOG	71124	1019870	-0.869616	-0.869616	0.00320877	-271.013
Abdul4	Direkli4	French6	60394	860102	-0.868779	-0.868779	0.0030109	-288.544
Blagotin3	Direkli4	French6	65071	1059497	-0.884274	-0.884274	0.00271078	-326.207
Direkli1-2	Direkli4	French6	71609	1010211	-0.867614	-0.867614	0.00316025	-274.539
Direkli5	Direkli4	French6	13789	217175	-0.880596	-0.880596	0.00290659	-302.965
Direkli6	Direkli4	French6	58086	882079	-0.876435	-0.876435	0.00285762	-306.701
Hovk1	Direkli4	French6	64139	920538	-0.869726	-0.869726	0.0031497	-276.13
Semnan3	Direkli4	French6	76578	1006306	-0.858567	-0.858567	0.00328129	-261.655
Moroccan8	Direkli4	French6	65847	1059622	-0.882987	-0.882987	0.00281096	-314.123
Moroccan3	Direkli4	French6	65970	1057322	-0.882542	-0.882542	0.00280885	-314.2
Tog	Direkli4	French6	70800	1057343	-0.874484	-0.874484	0.00287929	-303.715
Ethiopian1	Direkli4	French6	68269	1044358	-0.877283	-0.877283	0.00293605	-298.797
Sudanese6	Direkli4	French6	68259	1045456	-0.877421	-0.877421	0.00276796	-316.992
Nigerian2	Direkli4	French6	65530	1054168	-0.882951	-0.882951	0.0027865	-316.867
Aerbasi1	Direkli4	French6	51521	775673	-0.875432	-0.875432	0.0029729	-294.471
Alashan3	Direkli4	French6	64790	959194	-0.873455	-0.873455	0.0030118	-290.011
CHIR1	Direkli4	French6	76455	1016508	-0.860096	-0.860096	0.00337836	-254.589
Bangladeshi7	Direkli4	French6	73020	1013581	-0.865599	-0.865599	0.00322619	-268.304
Bangladeshi2	Direkli4	French6	73096	1013651	-0.865477	-0.865477	0.00317226	-272.827
Pakistani3	Direkli4	French6	73888	1016456	-0.864468	-0.864468	0.0031667	-272.987
Swiss2	Direkli4	French6	63459	1085550	-0.889541	-0.889541	0.00262248	-339.199
IOG	Direkli4	French6	63342	1085797	-0.889757	-0.889757	0.00257867	-345.044
Dutch1	Direkli4	French6	63390	1068944	-0.888037	-0.888037	0.00271212	-327.432
Italian1	Direkli4	French6	62010	1085239	-0.891898	-0.891898	0.00250953	-355.404
French2	Direkli4	French6	62662	1083259	-0.890635	-0.890635	0.00259397	-343.348
AlborzBezoar3	Direkli4	French6	71871	1003444	-0.866326	-0.866326	0.00316509	-273.712
AlborzBezoar2	Direkli4	French6	72851	1006534	-0.865014	-0.865014	0.0032091	-269.55
ZagrosBezoar2	Direkli4	French6	73116	1003620	-0.86419	-0.86419	0.00320588	-269.564
ZagrosBezoar3	Direkli4	French6	72769	1005072	-0.864973	-0.864973	0.00319832	-270.446
AlborzBezoar4	Direkli4	French6	72226	1006787	-0.866126	-0.866126	0.00320016	-270.651
AzerbaijanBezoar1	Direkli4	French6	71096	1008695	-0.868315	-0.868315	0.00313131	-277.301
ZagrosBezoar4	Direkli4	French6	71893	999522	-0.865798	-0.865798	0.00321581	-269.232
AzerbaijanBezoar5	Direkli4	French6	70587	1005846	-0.86885	-0.86885	0.00309715	-280.532
AzerbaijanBezoar6	Direkli4	French6	70115	1007258	-0.869841	-0.869841	0.00309399	-281.139
MarkaziBezoar1	Direkli4	French6	74430	1006095	-0.862234	-0.862234	0.00327706	-263.112
AzerbaijanBezoar10	Direkli4	French6	71789	1008730	-0.867121	-0.867121	0.00317044	-273.502
AlborzBezoar1	Direkli4	French6	72348	1002909	-0.865431	-0.865431	0.00325073	-266.227
AlborzBezoar5	Direkli4	French6	73083	1005930	-0.864537	-0.864537	0.00322092	-268.413
AlborzBezoar6	Direkli4	French6	72999	1002757	-0.864283	-0.864283	0.00318858	-271.056
MarkaziBezoar2	Direkli4	French6	76691	1004419	-0.858125	-0.858125	0.0033393	-256.978
MarkaziBezoar3	Direkli4	French6	75041	1005399	-0.861092	-0.861092	0.00327486	-262.94
Iranian11	Direkli4	French6	70361	1030582	-0.872181	-0.872181	0.00303995	-286.906
Iranian16	Direkli4	French6	70539	1031888	-0.87203	-0.87203	0.00305776	-285.186
Iranian18	Direkli4	French6	70403	1031615	-0.872229	-0.872229	0.00304911	-286.06
Iranian19	Direkli4	French6	69925	1031218	-0.872996	-0.872996	0.00303293	-287.839
Iranian4	Direkli4	French6	69451	1031661	-0.873853	-0.873853	0.00294827	-296.395
Iranian22	Direkli4	French6	70723	1030873	-0.871599	-0.871599	0.00307734	-283.231
Iranian21	Direkli4	French6	70751	1020185	-0.870293	-0.870293	0.00307863	-282.688
Abdul4	Direkli4	Dutch1	59019	857903	-0.871267	-0.871267	0.0029437	-295.977
Blagotin3	Direkli4	Dutch1	64437	1047370	-0.884086	-0.884086	0.00275998	-320.323
Direkli1-2	Direkli4	Dutch1	69841	1004050	-0.869929	-0.869929	0.00305147	-285.085
Direkli5	Direkli4	Dutch1	13557	216566	-0.882176	-0.882176	0.0028688	-307.507
Direkli6	Direkli4	Dutch1	56880	877450	-0.878244	-0.878244	0.00285083	-308.067
Hovk1	Direkli4	Dutch1	62201	918136	-0.873103	-0.873103	0.00302065	-289.045
Semnan3	Direkli4	Dutch1	73891	1007529	-0.863344	-0.863344	0.00314405	-274.596
Moroccan8	Direkli4	Dutch1	64986	1046494	-0.883064	-0.883064	0.0027378	-322.545
Moroccan3	Direkli4	Dutch1	65112	1043981	-0.882585	-0.882585	0.0027739	-318.174
Tog	Direkli4	Dutch1	69866	1044595	-0.874619	-0.874619	0.00283568	-308.434
Ethiopian1	Direkli4	Dutch1	66688	1035906	-0.879034	-0.879034	0.00282022	-311.69
Sudanese6	Direkli4	Dutch1	67265	1035583	-0.878016	-0.878016	0.00275729	-318.435
Nigerian2	Direkli4	Dutch1	64659	1042276	-0.883175	-0.883175	0.002765	-319.412
Aerbasi1	Direkli4	Dutch1	49708	777101	-0.879759	-0.879759	0.00280821	-313.281
Alashan3	Direkli4	Dutch1	62673	960044	-0.877438	-0.877438	0.00284862	-308.022
CHIR1	Direkli4	Dutch1	73584	1018861	-0.865286	-0.865286	0.00321672	-268.996
Bangladeshi7	Direkli4	Dutch1	70023	1016819	-0.871144	-0.871144	0.00299876	-290.501
Bangladeshi2	Direkli4	Dutch1	70367	1018536	-0.870756	-0.870756	0.00298327	-291.88
Pakistani3	Direkli4	Dutch1	71499	1018385	-0.868795	-0.868795	0.00304556	-285.267
Swiss2	Direkli4	Dutch1	62812	1073137	-0.88941	-0.88941	0.00258203	-344.462
IOG	Direkli4	Dutch1	62740	1073300	-0.889546	-0.889546	0.00255048	-348.776
French6	Direkli4	Dutch1	62024	1068944	-0.890317	-0.890317	0.00265347	-335.529
Italian1	Direkli4	Dutch1	61445	1072406	-0.891617	-0.891617	0.00255456	-349.03
French2	Direkli4	Dutch1	61949	1070448	-0.890588	-0.890588	0.0025734	-346.075
AlborzBezoar3	Direkli4	Dutch1	69664	1001092	-0.869879	-0.869879	0.00302739	-287.336
AlborzBezoar2	Direkli4	Dutch1	70639	1003065	-0.86842	-0.86842	0.00307588	-282.332
ZagrosBezoar2	Direkli4	Dutch1	70593	1002951	-0.868486	-0.868486	0.00305356	-284.417
ZagrosBezoar3	Direkli4	Dutch1	70545	1002873	-0.86856	-0.86856	0.00307857	-282.131
AlborzBezoar4	Direkli4	Dutch1	69907	1004758	-0.8699	-0.8699	0.00307988	-282.446
AzerbaijanBezoar1	Direkli4	Dutch1	68986	1006213	-0.871678	-0.871678	0.0030135	-289.258
ZagrosBezoar4	Direkli4	Dutch1	69061	998731	-0.870647	-0.870647	0.00302536	-287.783
AzerbaijanBezoar5	Direkli4	Dutch1	68568	1002856	-0.872006	-0.872006	0.00302192	-288.56
AzerbaijanBezoar6	Direkli4	Dutch1	68458	1004054	-0.872341	-0.872341	0.002998	-290.974
MarkaziBezoar1	Direkli4	Dutch1	71840	1005837	-0.866676	-0.866676	0.00309156	-280.337
AzerbaijanBezoar10	Direkli4	Dutch1	69671	1006130	-0.870476	-0.870476	0.00306981	-283.56
AlborzBezoar1	Direkli4	Dutch1	70250	1000096	-0.868734	-0.868734	0.0030776	-282.276
AlborzBezoar5	Direkli4	Dutch1	70311	1003322	-0.869022	-0.869022	0.00305438	-284.517
AlborzBezoar6	Direkli4	Dutch1	70617	999845	-0.868063	-0.868063	0.00305872	-283.799
MarkaziBezoar2	Direkli4	Dutch1	74399	1002869	-0.861875	-0.861875	0.00322517	-267.233
MarkaziBezoar3	Direkli4	Dutch1	72553	1005218	-0.865365	-0.865365	0.00311227	-278.05
Iranian11	Direkli4	Dutch1	68492	1027415	-0.875004	-0.875004	0.00296709	-294.903
Iranian16	Direkli4	Dutch1	68358	1029343	-0.875452	-0.875452	0.00299707	-292.103
Iranian18	Direkli4	Dutch1	67919	1029929	-0.876269	-0.876269	0.00285679	-306.732
Iranian19	Direkli4	Dutch1	67556	1029938	-0.87689	-0.87689	0.00293001	-299.279
Iranian4	Direkli4	Dutch1	67845	1029125	-0.876305	-0.876305	0.00289407	-302.793
Iranian22	Direkli4	Dutch1	68630	1029293	-0.874982	-0.874982	0.00294905	-296.7
Iranian21	Direkli4	Dutch1	68653	1021410	-0.874039	-0.874039	0.00295378	-295.905
Abdul4	Direkli4	Italian1	60738	860023	-0.86807	-0.86807	0.00304729	-284.866
Blagotin3	Direkli4	Italian1	64241	1064568	-0.886179	-0.886179	0.00270817	-327.224
Direkli1-2	Direkli4	Italian1	71517	1011312	-0.867907	-0.867907	0.00312146	-278.045
Direkli5	Direkli4	Italian1	13730	217462	-0.881224	-0.881224	0.00291332	-302.481
Direkli6	Direkli4	Italian1	58251	882861	-0.876208	-0.876208	0.00288942	-303.247
Hovk1	Direkli4	Italian1	64187	921816	-0.869804	-0.869804	0.0031343	-277.511
Semnan3	Direkli4	Italian1	76980	1006783	-0.857939	-0.857939	0.00334438	-256.532
Moroccan8	Direkli4	Italian1	67268	1051130	-0.879706	-0.879706	0.00289926	-303.425
Moroccan3	Direkli4	Italian1	67765	1045982	-0.878312	-0.878312	0.00294241	-298.5
Tog	Direkli4	Italian1	72800	1045130	-0.869759	-0.869759	0.00298056	-291.811
Ethiopian1	Direkli4	Italian1	69695	1036029	-0.873938	-0.873938	0.00300859	-290.481
Sudanese6	Direkli4	Italian1	69870	1036920	-0.873743	-0.873743	0.00289617	-301.689
Nigerian2	Direkli4	Italian1	67633	1040940	-0.877982	-0.877982	0.00293342	-299.303
Aerbasi1	Direkli4	Italian1	52029	775709	-0.874286	-0.874286	0.00301473	-290.004
Alashan3	Direkli4	Italian1	64856	958122	-0.873202	-0.873202	0.00303665	-287.554
CHIR1	Direkli4	Italian1	76769	1016957	-0.859619	-0.859619	0.00341808	-251.492
Bangladeshi7	Direkli4	Italian1	73654	1013823	-0.864541	-0.864541	0.00326707	-264.623
Bangladeshi2	Direkli4	Italian1	73688	1013846	-0.864486	-0.864486	0.00322168	-268.334
Pakistani3	Direkli4	Italian1	74458	1016447	-0.863493	-0.863493	0.00324768	-265.88
Swiss2	Direkli4	Italian1	60399	1111056	-0.896882	-0.896882	0.00244115	-367.401
IOG	Direkli4	Italian1	62862	1089240	-0.890874	-0.890874	0.00250255	-355.987
French6	Direkli4	Italian1	62066	1085239	-0.891806	-0.891806	0.00257519	-346.307
Dutch1	Direkli4	Italian1	62810	1072406	-0.889343	-0.889343	0.00273578	-325.078
French2	Direkli4	Italian1	58800	1113613	-0.899694	-0.899694	0.00251462	-357.786
AlborzBezoar3	Direkli4	Italian1	71903	1004288	-0.866375	-0.866375	0.00314366	-275.594
AlborzBezoar2	Direkli4	Italian1	72682	1007259	-0.865396	-0.865396	0.00317139	-272.876
ZagrosBezoar2	Direkli4	Italian1	73316	1004870	-0.864001	-0.864001	0.00326656	-264.499
ZagrosBezoar3	Direkli4	Italian1	72745	1006121	-0.865145	-0.865145	0.00324346	-266.736
AlborzBezoar4	Direkli4	Italian1	72432	1008206	-0.865946	-0.865946	0.00323147	-267.973
AzerbaijanBezoar1	Direkli4	Italian1	71155	1009828	-0.868351	-0.868351	0.00311984	-278.332
ZagrosBezoar4	Direkli4	Italian1	71818	1001005	-0.866114	-0.866114	0.00320089	-270.585
AzerbaijanBezoar5	Direkli4	Italian1	70755	1006332	-0.868618	-0.868618	0.00314388	-276.289
AzerbaijanBezoar6	Direkli4	Italian1	70275	1008485	-0.869711	-0.869711	0.00308507	-281.91
MarkaziBezoar1	Direkli4	Italian1	74577	1006686	-0.862056	-0.862056	0.00330314	-260.981
AzerbaijanBezoar10	Direkli4	Italian1	71936	1009865	-0.867007	-0.867007	0.00317981	-272.66
AlborzBezoar1	Direkli4	Italian1	72464	1003132	-0.865258	-0.865258	0.00323004	-267.878
AlborzBezoar5	Direkli4	Italian1	72784	1006988	-0.865186	-0.865186	0.00320524	-269.929
AlborzBezoar6	Direkli4	Italian1	73010	1003457	-0.864353	-0.864353	0.00320204	-269.938
MarkaziBezoar2	Direkli4	Italian1	77480	1003557	-0.856656	-0.856656	0.0034106	-251.175
MarkaziBezoar3	Direkli4	Italian1	75389	1005283	-0.860478	-0.860478	0.00330557	-260.311
Iranian11	Direkli4	Italian1	71158	1027831	-0.870503	-0.870503	0.0031038	-280.463
Iranian16	Direkli4	Italian1	70984	1029732	-0.871022	-0.871022	0.00312831	-278.432
Iranian18	Direkli4	Italian1	70767	1029481	-0.871362	-0.871362	0.00301448	-289.059
Iranian19	Direkli4	Italian1	70534	1030099	-0.87183	-0.87183	0.00310586	-280.705
Iranian4	Direkli4	Italian1	70172	1030383	-0.872479	-0.872479	0.00304013	-286.987
Iranian22	Direkli4	Italian1	71090	1028791	-0.870731	-0.870731	0.00311434	-279.588
Iranian21	Direkli4	Italian1	71423	1018261	-0.868911	-0.868911	0.00309645	-280.615
Abdul4	Direkli4	French2	60078	860358	-0.869457	-0.869457	0.00304436	-285.596
Blagotin3	Direkli4	French2	63823	1063357	-0.886756	-0.886756	0.00271436	-326.691
Direkli1-2	Direkli4	French2	70457	1011562	-0.869768	-0.869768	0.00308911	-281.559
Direkli5	Direkli4	French2	13474	217364	-0.88326	-0.88326	0.0028669	-308.089
Direkli6	Direkli4	French2	57535	882571	-0.877599	-0.877599	0.00288361	-304.341
Hovk1	Direkli4	French2	63687	920756	-0.870613	-0.870613	0.00315817	-275.67
Semnan3	Direkli4	French2	76141	1007485	-0.85947	-0.85947	0.00330725	-259.875
Moroccan8	Direkli4	French2	65903	1052079	-0.882104	-0.882104	0.00282804	-311.913
Moroccan3	Direkli4	French2	66846	1047260	-0.880001	-0.880001	0.00286391	-307.273
Tog	Direkli4	French2	71968	1044662	-0.871098	-0.871098	0.00295706	-294.583
Ethiopian1	Direkli4	French2	68466	1037148	-0.876148	-0.876148	0.00293883	-298.129
Sudanese6	Direkli4	French2	68856	1036886	-0.875457	-0.875457	0.00281733	-310.74
Nigerian2	Direkli4	French2	66455	1041870	-0.88008	-0.88008	0.00285478	-308.283
Aerbasi1	Direkli4	French2	51115	775967	-0.876397	-0.876397	0.0029546	-296.621
Alashan3	Direkli4	French2	64007	959432	-0.874918	-0.874918	0.00295752	-295.828
CHIR1	Direkli4	French2	75423	1018686	-0.862129	-0.862129	0.00336687	-256.062
Bangladeshi7	Direkli4	French2	72025	1015528	-0.867547	-0.867547	0.00318727	-272.191
Bangladeshi2	Direkli4	French2	72392	1016424	-0.867026	-0.867026	0.00311788	-278.082
Pakistani3	Direkli4	French2	73054	1017140	-0.86598	-0.86598	0.00316928	-273.242
Swiss2	Direkli4	French2	61461	1096675	-0.893862	-0.893862	0.00255676	-349.608
IOG	Direkli4	French2	62242	1088525	-0.891825	-0.891825	0.0025225	-353.548
French6	Direkli4	French2	61614	1083259	-0.892365	-0.892365	0.00261364	-341.426
Dutch1	Direkli4	French2	62211	1070448	-0.89015	-0.89015	0.00264336	-336.75
Italian1	Direkli4	French2	57621	1113613	-0.901606	-0.901606	0.00247939	-363.64
AlborzBezoar3	Direkli4	French2	71199	1004557	-0.86763	-0.86763	0.00314942	-275.489
AlborzBezoar2	Direkli4	French2	71889	1007066	-0.866743	-0.866743	0.00320467	-270.463
ZagrosBezoar2	Direkli4	French2	72255	1005108	-0.865867	-0.865867	0.00319213	-271.251
ZagrosBezoar3	Direkli4	French2	72036	1006068	-0.866365	-0.866365	0.00320973	-269.918
AlborzBezoar4	Direkli4	French2	71502	1008505	-0.86759	-0.86759	0.0031896	-272.006
AzerbaijanBezoar1	Direkli4	French2	70559	1010690	-0.869486	-0.869486	0.0031503	-276.001
ZagrosBezoar4	Direkli4	French2	70850	1001264	-0.867831	-0.867831	0.0031445	-275.984
AzerbaijanBezoar5	Direkli4	French2	69768	1007582	-0.870482	-0.870482	0.00310439	-280.404
AzerbaijanBezoar6	Direkli4	French2	69480	1009256	-0.871183	-0.871183	0.00308691	-282.219
MarkaziBezoar1	Direkli4	French2	73458	1007607	-0.864101	-0.864101	0.00324751	-266.081
AzerbaijanBezoar10	Direkli4	French2	71160	1010479	-0.868422	-0.868422	0.00318416	-272.732
AlborzBezoar1	Direkli4	French2	71367	1004100	-0.867282	-0.867282	0.00319057	-271.827
AlborzBezoar5	Direkli4	French2	71915	1007062	-0.866698	-0.866698	0.00318841	-271.828
AlborzBezoar6	Direkli4	French2	72103	1004221	-0.86602	-0.86602	0.00315748	-274.275
MarkaziBezoar2	Direkli4	French2	75939	1005382	-0.859544	-0.859544	0.00335883	-255.906
MarkaziBezoar3	Direkli4	French2	74404	1006252	-0.862298	-0.862298	0.00326422	-264.166
Iranian11	Direkli4	French2	70037	1029935	-0.872657	-0.872657	0.00304562	-286.528
Iranian16	Direkli4	French2	69652	1031886	-0.873537	-0.873537	0.00305158	-286.257
Iranian18	Direkli4	French2	69932	1030017	-0.872845	-0.872845	0.00300079	-290.872
Iranian19	Direkli4	French2	69310	1030702	-0.873983	-0.873983	0.0030346	-288.006
Iranian4	Direkli4	French2	69247	1030976	-0.874122	-0.874122	0.00298028	-293.302
Iranian22	Direkli4	French2	70095	1030036	-0.87257	-0.87257	0.00306328	-284.848
Iranian21	Direkli4	French2	70254	1019957	-0.871119	-0.871119	0.00308768	-282.127
Abdul4	Direkli4	AlborzBezoar3	58631	866962	-0.873312	-0.873312	0.00299102	-291.978
Blagotin3	Direkli4	AlborzBezoar3	71977	997883	-0.865446	-0.865446	0.0032203	-268.747
Direkli1-2	Direkli4	AlborzBezoar3	68880	1014599	-0.872854	-0.872854	0.00308517	-282.919
Direkli5	Direkli4	AlborzBezoar3	13218	219120	-0.886217	-0.886217	0.00287628	-308.113
Direkli6	Direkli4	AlborzBezoar3	56637	884341	-0.879621	-0.879621	0.00297438	-295.732
Hovk1	Direkli4	AlborzBezoar3	58148	951437	-0.884808	-0.884808	0.00291535	-303.5
Semnan3	Direkli4	AlborzBezoar3	74593	1007581	-0.862142	-0.862142	0.00331608	-259.988
Moroccan8	Direkli4	AlborzBezoar3	71437	1006023	-0.867397	-0.867397	0.00321266	-269.994
Moroccan3	Direkli4	AlborzBezoar3	71988	1005729	-0.866406	-0.866406	0.00320964	-269.938
Tog	Direkli4	AlborzBezoar3	76911	1004286	-0.85773	-0.85773	0.00327588	-261.832
Ethiopian1	Direkli4	AlborzBezoar3	72106	1005635	-0.86619	-0.86619	0.00321577	-269.357
Sudanese6	Direkli4	AlborzBezoar3	72928	1003521	-0.864503	-0.864503	0.00310905	-278.06
Nigerian2	Direkli4	AlborzBezoar3	71515	1001710	-0.866729	-0.866729	0.00321103	-269.923
Aerbasi1	Direkli4	AlborzBezoar3	52347	765223	-0.871945	-0.871945	0.00312372	-279.136
Alashan3	Direkli4	AlborzBezoar3	65463	946559	-0.870629	-0.870629	0.00311164	-279.797
CHIR1	Direkli4	AlborzBezoar3	75610	1008902	-0.860564	-0.860564	0.00339254	-253.663
Bangladeshi7	Direkli4	AlborzBezoar3	72257	1007446	-0.866154	-0.866154	0.00322317	-268.727
Bangladeshi2	Direkli4	AlborzBezoar3	72626	1008032	-0.865589	-0.865589	0.00319075	-271.281
Pakistani3	Direkli4	AlborzBezoar3	73321	1009341	-0.864554	-0.864554	0.00322548	-268.039
Swiss2	Direkli4	AlborzBezoar3	73371	1004419	-0.863849	-0.863849	0.00323289	-267.207
IOG	Direkli4	AlborzBezoar3	73343	1004617	-0.863923	-0.863923	0.00319322	-270.549
French6	Direkli4	AlborzBezoar3	72094	1003444	-0.865939	-0.865939	0.00325644	-265.916
Dutch1	Direkli4	AlborzBezoar3	71125	1001092	-0.867331	-0.867331	0.00316897	-273.695
Italian1	Direkli4	AlborzBezoar3	71939	1004288	-0.866313	-0.866313	0.00314885	-275.121
French2	Direkli4	AlborzBezoar3	72389	1004557	-0.865566	-0.865566	0.0032087	-269.756
AlborzBezoar2	Direkli4	AlborzBezoar3	61487	1072284	-0.891535	-0.891535	0.00264405	-337.186
ZagrosBezoar2	Direkli4	AlborzBezoar3	69818	1017325	-0.871557	-0.871557	0.00311422	-279.864
ZagrosBezoar3	Direkli4	AlborzBezoar3	69550	1017800	-0.872074	-0.872074	0.00311267	-280.169
AlborzBezoar4	Direkli4	AlborzBezoar3	62719	1060769	-0.88835	-0.88835	0.0027368	-324.594
AzerbaijanBezoar1	Direkli4	AlborzBezoar3	64098	1045853	-0.884503	-0.884503	0.0028517	-310.167
ZagrosBezoar4	Direkli4	AlborzBezoar3	68301	1013179	-0.87369	-0.87369	0.0030729	-284.321
AzerbaijanBezoar5	Direkli4	AlborzBezoar3	63663	1043404	-0.884988	-0.884988	0.00280111	-315.942
AzerbaijanBezoar6	Direkli4	AlborzBezoar3	63506	1044461	-0.885365	-0.885365	0.0028192	-314.048
MarkaziBezoar1	Direkli4	AlborzBezoar3	71732	1013686	-0.867826	-0.867826	0.00320147	-271.071
AzerbaijanBezoar10	Direkli4	AlborzBezoar3	64893	1046033	-0.883173	-0.883173	0.00291866	-302.596
AlborzBezoar1	Direkli4	AlborzBezoar3	61869	1063918	-0.890088	-0.890088	0.00272298	-326.88
AlborzBezoar5	Direkli4	AlborzBezoar3	62155	1071694	-0.890365	-0.890365	0.00278539	-319.656
AlborzBezoar6	Direkli4	AlborzBezoar3	60997	1071750	-0.892302	-0.892302	0.00262456	-339.981
MarkaziBezoar2	Direkli4	AlborzBezoar3	75133	1001840	-0.860474	-0.860474	0.00334014	-257.616
MarkaziBezoar3	Direkli4	AlborzBezoar3	73035	1007659	-0.864837	-0.864837	0.00324197	-266.763
Iranian11	Direkli4	AlborzBezoar3	72076	1008022	-0.866538	-0.866538	0.00321744	-269.325
Iranian16	Direkli4	AlborzBezoar3	72211	1009121	-0.866441	-0.866441	0.00325665	-266.053
Iranian18	Direkli4	AlborzBezoar3	71807	1009086	-0.867134	-0.867134	0.00314554	-275.671
Iranian19	Direkli4	AlborzBezoar3	71864	1008544	-0.866969	-0.866969	0.00322438	-268.879
Iranian4	Direkli4	AlborzBezoar3	71710	1008510	-0.867231	-0.867231	0.00320126	-270.903
Iranian22	Direkli4	AlborzBezoar3	72029	1007636	-0.866572	-0.866572	0.00323764	-267.655
Iranian21	Direkli4	AlborzBezoar3	71101	1006727	-0.868066	-0.868066	0.00318864	-272.237
Abdul4	Direkli4	AlborzBezoar2	59342	869124	-0.872172	-0.872172	0.00299271	-291.432
Blagotin3	Direkli4	AlborzBezoar2	73272	999811	-0.863437	-0.863437	0.00320338	-269.539
Direkli1-2	Direkli4	AlborzBezoar2	69972	1019766	-0.87158	-0.87158	0.00306447	-284.414
Direkli5	Direkli4	AlborzBezoar2	13267	219623	-0.886066	-0.886066	0.00281074	-315.243
Direkli6	Direkli4	AlborzBezoar2	57471	887392	-0.878351	-0.878351	0.00293016	-299.762
Hovk1	Direkli4	AlborzBezoar2	58753	955174	-0.884108	-0.884108	0.00293734	-300.989
Semnan3	Direkli4	AlborzBezoar2	75625	1010908	-0.860796	-0.860796	0.00326953	-263.278
Moroccan8	Direkli4	AlborzBezoar2	72807	1008680	-0.865358	-0.865358	0.00318316	-271.855
Moroccan3	Direkli4	AlborzBezoar2	72826	1008271	-0.865274	-0.865274	0.00319735	-270.622
Tog	Direkli4	AlborzBezoar2	78018	1007604	-0.85627	-0.85627	0.00327452	-261.495
Ethiopian1	Direkli4	AlborzBezoar2	73107	1009278	-0.864915	-0.864915	0.00319077	-271.068
Sudanese6	Direkli4	AlborzBezoar2	73959	1006273	-0.863068	-0.863068	0.00311296	-277.25
Nigerian2	Direkli4	AlborzBezoar2	72630	1004460	-0.865137	-0.865137	0.00320857	-269.633
Aerbasi1	Direkli4	AlborzBezoar2	52917	766706	-0.870875	-0.870875	0.00311102	-279.932
Alashan3	Direkli4	AlborzBezoar2	66313	947736	-0.869211	-0.869211	0.00310954	-279.531
CHIR1	Direkli4	AlborzBezoar2	76483	1011695	-0.859429	-0.859429	0.00338689	-253.752
Bangladeshi7	Direkli4	AlborzBezoar2	73331	1010723	-0.86471	-0.86471	0.00319612	-270.55
Bangladeshi2	Direkli4	AlborzBezoar2	73603	1010831	-0.864255	-0.864255	0.00319752	-270.289
Pakistani3	Direkli4	AlborzBezoar2	74516	1011622	-0.862787	-0.862787	0.00325489	-265.074
Swiss2	Direkli4	AlborzBezoar2	74610	1006999	-0.862039	-0.862039	0.00322505	-267.295
IOG	Direkli4	AlborzBezoar2	74084	1008563	-0.863143	-0.863143	0.00313526	-275.302
French6	Direkli4	AlborzBezoar2	73217	1006534	-0.864382	-0.864382	0.00321932	-268.498
Dutch1	Direkli4	AlborzBezoar2	72313	1003065	-0.865511	-0.865511	0.00316423	-273.53
Italian1	Direkli4	AlborzBezoar2	72959	1007259	-0.864918	-0.864918	0.00310356	-278.686
French2	Direkli4	AlborzBezoar2	73323	1007066	-0.864266	-0.864266	0.00318689	-271.194
AlborzBezoar3	Direkli4	AlborzBezoar2	61801	1072284	-0.891012	-0.891012	0.00257988	-345.37
ZagrosBezoar2	Direkli4	AlborzBezoar2	70788	1020820	-0.870305	-0.870305	0.00311067	-279.781
ZagrosBezoar3	Direkli4	AlborzBezoar2	70513	1020568	-0.870746	-0.870746	0.00310797	-280.165
AlborzBezoar4	Direkli4	AlborzBezoar2	64448	1063555	-0.885731	-0.885731	0.00277854	-318.776
AzerbaijanBezoar1	Direkli4	AlborzBezoar2	64875	1050398	-0.883661	-0.883661	0.00286734	-308.181
ZagrosBezoar4	Direkli4	AlborzBezoar2	69496	1015791	-0.871931	-0.871931	0.00309298	-281.906
AzerbaijanBezoar5	Direkli4	AlborzBezoar2	64484	1047175	-0.883986	-0.883986	0.00281779	-313.716
AzerbaijanBezoar6	Direkli4	AlborzBezoar2	64096	1049076	-0.884841	-0.884841	0.00277794	-318.524
MarkaziBezoar1	Direkli4	AlborzBezoar2	72555	1016522	-0.866759	-0.866759	0.00321013	-270.008
AzerbaijanBezoar10	Direkli4	AlborzBezoar2	65121	1050591	-0.883266	-0.883266	0.00286867	-307.901
AlborzBezoar1	Direkli4	AlborzBezoar2	61479	1078213	-0.892113	-0.892113	0.00268708	-332.001
AlborzBezoar5	Direkli4	AlborzBezoar2	61018	1086117	-0.893617	-0.893617	0.00259516	-344.34
AlborzBezoar6	Direkli4	AlborzBezoar2	62950	1068512	-0.888728	-0.888728	0.00260028	-341.781
MarkaziBezoar2	Direkli4	AlborzBezoar2	76413	1004896	-0.858666	-0.858666	0.00337941	-254.088
MarkaziBezoar3	Direkli4	AlborzBezoar2	74060	1010298	-0.863403	-0.863403	0.00326965	-264.066
Iranian11	Direkli4	AlborzBezoar2	73551	1009559	-0.864186	-0.864186	0.00325216	-265.727
Iranian16	Direkli4	AlborzBezoar2	73630	1011330	-0.864271	-0.864271	0.00326652	-264.584
Iranian18	Direkli4	AlborzBezoar2	72891	1011268	-0.865534	-0.865534	0.00315498	-274.339
Iranian19	Direkli4	AlborzBezoar2	72892	1011362	-0.865544	-0.865544	0.00323596	-267.477
Iranian4	Direkli4	AlborzBezoar2	72800	1011156	-0.865677	-0.865677	0.00317504	-272.651
Iranian22	Direkli4	AlborzBezoar2	73226	1010271	-0.864834	-0.864834	0.00322137	-268.467
Iranian21	Direkli4	AlborzBezoar2	72210	1008972	-0.866424	-0.866424	0.00321877	-269.178
Abdul4	Direkli4	ZagrosBezoar2	53983	872379	-0.883452	-0.883452	0.0026988	-327.35
Blagotin3	Direkli4	ZagrosBezoar2	67867	995639	-0.872371	-0.872371	0.00305832	-285.245
Direkli1-2	Direkli4	ZagrosBezoar2	66591	1000061	-0.87514	-0.87514	0.00296265	-295.391
Direkli5	Direkli4	ZagrosBezoar2	12842	215834	-0.887684	-0.887684	0.00271151	-327.377
Direkli6	Direkli4	ZagrosBezoar2	54588	872117	-0.882189	-0.882189	0.00275477	-320.241
Hovk1	Direkli4	ZagrosBezoar2	57591	927310	-0.883052	-0.883052	0.00287453	-307.199
Semnan3	Direkli4	ZagrosBezoar2	68518	1016143	-0.87366	-0.87366	0.00297454	-293.712
Moroccan8	Direkli4	ZagrosBezoar2	66770	1009105	-0.875878	-0.875878	0.00294509	-297.402
Moroccan3	Direkli4	ZagrosBezoar2	66526	1009410	-0.876338	-0.876338	0.00298657	-293.427
Tog	Direkli4	ZagrosBezoar2	71831	1007671	-0.866918	-0.866918	0.0030001	-288.964
Ethiopian1	Direkli4	ZagrosBezoar2	67163	1010527	-0.875358	-0.875358	0.00292934	-298.824
Sudanese6	Direkli4	ZagrosBezoar2	67455	1009057	-0.874679	-0.874679	0.00281695	-310.506
Nigerian2	Direkli4	ZagrosBezoar2	66399	1004870	-0.876037	-0.876037	0.00292574	-299.424
Aerbasi1	Direkli4	ZagrosBezoar2	47696	772663	-0.883719	-0.883719	0.00278712	-317.073
Alashan3	Direkli4	ZagrosBezoar2	59976	954868	-0.881803	-0.881803	0.00283874	-310.632
CHIR1	Direkli4	ZagrosBezoar2	69426	1019341	-0.872469	-0.872469	0.00310788	-280.728
Bangladeshi7	Direkli4	ZagrosBezoar2	65718	1018540	-0.878778	-0.878778	0.00290399	-302.61
Bangladeshi2	Direkli4	ZagrosBezoar2	66386	1017715	-0.877528	-0.877528	0.00288044	-304.651
Pakistani3	Direkli4	ZagrosBezoar2	67214	1019259	-0.876271	-0.876271	0.00294902	-297.14
Swiss2	Direkli4	ZagrosBezoar2	68644	1003467	-0.871946	-0.871946	0.00298128	-292.474
IOG	Direkli4	ZagrosBezoar2	68211	1004631	-0.872841	-0.872841	0.00293626	-297.263
French6	Direkli4	ZagrosBezoar2	67030	1003620	-0.874786	-0.874786	0.00298847	-292.72
Dutch1	Direkli4	ZagrosBezoar2	65856	1002951	-0.876767	-0.876767	0.00289169	-303.203
Italian1	Direkli4	ZagrosBezoar2	67226	1004870	-0.87459	-0.87459	0.00296525	-294.947
French2	Direkli4	ZagrosBezoar2	67298	1005108	-0.874492	-0.874492	0.00293833	-297.615
AlborzBezoar3	Direkli4	ZagrosBezoar2	63722	1017325	-0.882111	-0.882111	0.00279348	-315.775
AlborzBezoar2	Direkli4	ZagrosBezoar2	64320	1020820	-0.881453	-0.881453	0.00283047	-311.415
ZagrosBezoar3	Direkli4	ZagrosBezoar2	44952	1176729	-0.92641	-0.92641	0.00231445	-400.272
AlborzBezoar4	Direkli4	ZagrosBezoar2	63862	1021863	-0.882361	-0.882361	0.00280369	-314.714
AzerbaijanBezoar1	Direkli4	ZagrosBezoar2	63578	1019049	-0.882549	-0.882549	0.00285978	-308.608
ZagrosBezoar4	Direkli4	ZagrosBezoar2	42557	1188109	-0.930839	-0.930839	0.00226025	-411.831
AzerbaijanBezoar5	Direkli4	ZagrosBezoar2	63185	1016734	-0.882982	-0.882982	0.00277184	-318.554
AzerbaijanBezoar6	Direkli4	ZagrosBezoar2	62682	1017453	-0.883937	-0.883937	0.00276681	-319.478
MarkaziBezoar1	Direkli4	ZagrosBezoar2	65143	1027223	-0.88073	-0.88073	0.00286095	-307.846
AzerbaijanBezoar10	Direkli4	ZagrosBezoar2	64128	1018987	-0.881586	-0.881586	0.00287312	-306.839
AlborzBezoar1	Direkli4	ZagrosBezoar2	63965	1016615	-0.88161	-0.88161	0.00280074	-314.778
AlborzBezoar5	Direkli4	ZagrosBezoar2	64340	1020514	-0.881385	-0.881385	0.00287702	-306.354
AlborzBezoar6	Direkli4	ZagrosBezoar2	64590	1016890	-0.880553	-0.880553	0.00281921	-312.34
MarkaziBezoar2	Direkli4	ZagrosBezoar2	67749	1018709	-0.875285	-0.875285	0.00296417	-295.288
MarkaziBezoar3	Direkli4	ZagrosBezoar2	66262	1021159	-0.87813	-0.87813	0.00286348	-306.665
Iranian11	Direkli4	ZagrosBezoar2	66509	1015365	-0.877049	-0.877049	0.00295071	-297.233
Iranian16	Direkli4	ZagrosBezoar2	66601	1016902	-0.877064	-0.877064	0.00294684	-297.629
Iranian18	Direkli4	ZagrosBezoar2	65964	1016577	-0.878131	-0.878131	0.00286409	-306.601
Iranian19	Direkli4	ZagrosBezoar2	65855	1017036	-0.878372	-0.878372	0.0029128	-301.556
Iranian4	Direkli4	ZagrosBezoar2	65962	1016257	-0.878099	-0.878099	0.0028787	-305.034
Iranian22	Direkli4	ZagrosBezoar2	66397	1015548	-0.877264	-0.877264	0.00293275	-299.126
Iranian21	Direkli4	ZagrosBezoar2	65197	1015504	-0.879343	-0.879343	0.00287998	-305.33
Abdul4	Direkli4	ZagrosBezoar3	54218	872938	-0.883045	-0.883045	0.00275005	-321.102
Blagotin3	Direkli4	ZagrosBezoar3	68044	995893	-0.87209	-0.87209	0.00302138	-288.639
Direkli1-2	Direkli4	ZagrosBezoar3	66816	1000540	-0.874801	-0.874801	0.0030194	-289.726
Direkli5	Direkli4	ZagrosBezoar3	12735	216301	-0.888795	-0.888795	0.00282574	-314.535
Direkli6	Direkli4	ZagrosBezoar3	54855	872937	-0.881752	-0.881752	0.00279547	-315.422
Hovk1	Direkli4	ZagrosBezoar3	57814	928281	-0.882741	-0.882741	0.00290144	-304.243
Semnan3	Direkli4	ZagrosBezoar3	68884	1016776	-0.873102	-0.873102	0.00299867	-291.163
Moroccan8	Direkli4	ZagrosBezoar3	67117	1010547	-0.87544	-0.87544	0.0029652	-295.238
Moroccan3	Direkli4	ZagrosBezoar3	66858	1009829	-0.875808	-0.875808	0.00297693	-294.198
Tog	Direkli4	ZagrosBezoar3	71839	1008472	-0.867003	-0.867003	0.00299734	-289.257
Ethiopian1	Direkli4	ZagrosBezoar3	67484	1011632	-0.874927	-0.874927	0.00298999	-292.619
Sudanese6	Direkli4	ZagrosBezoar3	68151	1009279	-0.873493	-0.873493	0.00287084	-304.264
Nigerian2	Direkli4	ZagrosBezoar3	66913	1005854	-0.875252	-0.875252	0.00296157	-295.537
Aerbasi1	Direkli4	ZagrosBezoar3	47959	773091	-0.883176	-0.883176	0.00279213	-316.309
Alashan3	Direkli4	ZagrosBezoar3	60401	955549	-0.881095	-0.881095	0.00284426	-309.78
CHIR1	Direkli4	ZagrosBezoar3	69240	1020927	-0.872974	-0.872974	0.00307276	-284.101
Bangladeshi7	Direkli4	ZagrosBezoar3	66154	1019920	-0.878178	-0.878178	0.00291617	-301.141
Bangladeshi2	Direkli4	ZagrosBezoar3	66739	1018955	-0.877057	-0.877057	0.00291626	-300.748
Pakistani3	Direkli4	ZagrosBezoar3	67491	1019434	-0.875813	-0.875813	0.00296228	-295.655
Swiss2	Direkli4	ZagrosBezoar3	69086	1004301	-0.871275	-0.871275	0.00300283	-290.152
IOG	Direkli4	ZagrosBezoar3	68529	1006117	-0.872462	-0.872462	0.00297065	-293.694
French6	Direkli4	ZagrosBezoar3	67347	1005072	-0.874402	-0.874402	0.00300739	-290.751
Dutch1	Direkli4	ZagrosBezoar3	66507	1002873	-0.875616	-0.875616	0.00295036	-296.783
Italian1	Direkli4	ZagrosBezoar3	67333	1006121	-0.874549	-0.874549	0.00297519	-293.947
French2	Direkli4	ZagrosBezoar3	67536	1006068	-0.874188	-0.874188	0.0029762	-293.727
AlborzBezoar3	Direkli4	ZagrosBezoar3	63921	1017800	-0.881816	-0.881816	0.00285772	-308.573
AlborzBezoar2	Direkli4	ZagrosBezoar3	64725	1020568	-0.880723	-0.880723	0.00288539	-305.236
ZagrosBezoar2	Direkli4	ZagrosBezoar3	45509	1176729	-0.925532	-0.925532	0.00230538	-401.465
AlborzBezoar4	Direkli4	ZagrosBezoar3	64128	1021923	-0.881906	-0.881906	0.002833	-311.298
AzerbaijanBezoar1	Direkli4	ZagrosBezoar3	63625	1021179	-0.882698	-0.882698	0.00288279	-306.195
ZagrosBezoar4	Direkli4	ZagrosBezoar3	42146	1184985	-0.93131	-0.93131	0.00197854	-470.705
AzerbaijanBezoar5	Direkli4	ZagrosBezoar3	63149	1017531	-0.883131	-0.883131	0.00278545	-317.052
AzerbaijanBezoar6	Direkli4	ZagrosBezoar3	62830	1018619	-0.883804	-0.883804	0.00281553	-313.904
MarkaziBezoar1	Direkli4	ZagrosBezoar3	65226	1027134	-0.880578	-0.880578	0.00288322	-305.415
AzerbaijanBezoar10	Direkli4	ZagrosBezoar3	64147	1020226	-0.881688	-0.881688	0.00289613	-304.437
AlborzBezoar1	Direkli4	ZagrosBezoar3	64540	1016845	-0.880635	-0.880635	0.00284148	-309.921
AlborzBezoar5	Direkli4	ZagrosBezoar3	64786	1021030	-0.880668	-0.880668	0.00285191	-308.8
AlborzBezoar6	Direkli4	ZagrosBezoar3	65034	1017205	-0.879816	-0.879816	0.0028664	-306.941
MarkaziBezoar2	Direkli4	ZagrosBezoar3	68179	1018747	-0.874547	-0.874547	0.00301769	-289.807
MarkaziBezoar3	Direkli4	ZagrosBezoar3	66484	1021438	-0.877778	-0.877778	0.00292512	-300.083
Iranian11	Direkli4	ZagrosBezoar3	66552	1016549	-0.877108	-0.877108	0.00292277	-300.095
Iranian16	Direkli4	ZagrosBezoar3	67101	1016734	-0.876179	-0.876179	0.00297521	-294.493
Iranian18	Direkli4	ZagrosBezoar3	66323	1017080	-0.877565	-0.877565	0.00286001	-306.84
Iranian19	Direkli4	ZagrosBezoar3	66397	1017413	-0.877475	-0.877475	0.00292983	-299.496
Iranian4	Direkli4	ZagrosBezoar3	66301	1016453	-0.877533	-0.877533	0.00291437	-301.106
Iranian22	Direkli4	ZagrosBezoar3	66700	1015910	-0.876779	-0.876779	0.00292877	-299.368
Iranian21	Direkli4	ZagrosBezoar3	65444	1016006	-0.87897	-0.87897	0.00291157	-301.888
Abdul4	Direkli4	AlborzBezoar4	58929	870486	-0.873191	-0.873191	0.00297939	-293.077
Blagotin3	Direkli4	AlborzBezoar4	73202	1001663	-0.863793	-0.863793	0.0032539	-265.464
Direkli1-2	Direkli4	AlborzBezoar4	69789	1020405	-0.87197	-0.87197	0.00312668	-278.88
Direkli5	Direkli4	AlborzBezoar4	13367	220046	-0.885465	-0.885465	0.00278882	-317.505
Direkli6	Direkli4	AlborzBezoar4	57216	888787	-0.879036	-0.879036	0.00296211	-296.76
Hovk1	Direkli4	AlborzBezoar4	58795	955300	-0.884044	-0.884044	0.00298808	-295.857
Semnan3	Direkli4	AlborzBezoar4	75797	1010264	-0.860418	-0.860418	0.00331796	-259.322
Moroccan8	Direkli4	AlborzBezoar4	72305	1010167	-0.866408	-0.866408	0.00321889	-269.163
Moroccan3	Direkli4	AlborzBezoar4	72689	1008482	-0.865537	-0.865537	0.00322227	-268.611
Tog	Direkli4	AlborzBezoar4	77957	1007905	-0.856414	-0.856414	0.00333272	-256.971
Ethiopian1	Direkli4	AlborzBezoar4	72798	1010302	-0.865575	-0.865575	0.00321061	-269.598
Sudanese6	Direkli4	AlborzBezoar4	73602	1007857	-0.863884	-0.863884	0.00311013	-277.765
Nigerian2	Direkli4	AlborzBezoar4	72373	1005076	-0.865659	-0.865659	0.00324654	-266.641
Aerbasi1	Direkli4	AlborzBezoar4	52664	768150	-0.871679	-0.871679	0.00307399	-283.566
Alashan3	Direkli4	AlborzBezoar4	66503	949697	-0.869114	-0.869114	0.00315085	-275.835
CHIR1	Direkli4	AlborzBezoar4	76676	1012534	-0.859208	-0.859208	0.00340033	-252.684
Bangladeshi7	Direkli4	AlborzBezoar4	73278	1010651	-0.864792	-0.864792	0.00324747	-266.297
Bangladeshi2	Direkli4	AlborzBezoar4	73450	1011081	-0.86455	-0.86455	0.00325329	-265.746
Pakistani3	Direkli4	AlborzBezoar4	74371	1011658	-0.86304	-0.86304	0.00326124	-264.636
Swiss2	Direkli4	AlborzBezoar4	74462	1008067	-0.86243	-0.86243	0.00325978	-264.567
IOG	Direkli4	AlborzBezoar4	74083	1008478	-0.863134	-0.863134	0.00322171	-267.912
French6	Direkli4	AlborzBezoar4	72985	1006787	-0.864814	-0.864814	0.00328371	-263.365
Dutch1	Direkli4	AlborzBezoar4	71956	1004758	-0.866341	-0.866341	0.0031903	-271.555
Italian1	Direkli4	AlborzBezoar4	73078	1008206	-0.864831	-0.864831	0.00322785	-267.928
French2	Direkli4	AlborzBezoar4	73299	1008505	-0.864487	-0.864487	0.00322405	-268.137
AlborzBezoar3	Direkli4	AlborzBezoar4	63390	1060769	-0.887222	-0.887222	0.00271866	-326.345
AlborzBezoar2	Direkli4	AlborzBezoar4	64817	1063555	-0.885114	-0.885114	0.00283669	-312.023
ZagrosBezoar2	Direkli4	AlborzBezoar4	70740	1021863	-0.870511	-0.870511	0.00311058	-279.854
ZagrosBezoar3	Direkli4	AlborzBezoar4	70321	1021923	-0.871236	-0.871236	0.00308701	-282.226
AzerbaijanBezoar1	Direkli4	AlborzBezoar4	64205	1052711	-0.885032	-0.885032	0.00282389	-313.408
ZagrosBezoar4	Direkli4	AlborzBezoar4	69319	1017348	-0.872419	-0.872419	0.00307331	-283.87
AzerbaijanBezoar5	Direkli4	AlborzBezoar4	64579	1048340	-0.883947	-0.883947	0.00285681	-309.417
AzerbaijanBezoar6	Direkli4	AlborzBezoar4	64209	1051136	-0.884862	-0.884862	0.00283341	-312.296
MarkaziBezoar1	Direkli4	AlborzBezoar4	72483	1017553	-0.867008	-0.867008	0.0032137	-269.785
AzerbaijanBezoar10	Direkli4	AlborzBezoar4	65428	1051838	-0.882878	-0.882878	0.00293735	-300.57
AlborzBezoar1	Direkli4	AlborzBezoar4	64062	1058706	-0.885886	-0.885886	0.00277287	-319.483
AlborzBezoar5	Direkli4	AlborzBezoar4	64356	1063439	-0.885873	-0.885873	0.00276154	-320.789
AlborzBezoar6	Direkli4	AlborzBezoar4	64113	1057973	-0.885725	-0.885725	0.00274608	-322.542
MarkaziBezoar2	Direkli4	AlborzBezoar4	76459	1004942	-0.858593	-0.858593	0.00337974	-254.041
MarkaziBezoar3	Direkli4	AlborzBezoar4	74325	1009598	-0.862859	-0.862859	0.00327985	-263.079
Iranian11	Direkli4	AlborzBezoar4	73148	1011618	-0.865136	-0.865136	0.00326018	-265.365
Iranian16	Direkli4	AlborzBezoar4	73209	1013162	-0.865223	-0.865223	0.00324435	-266.686
Iranian18	Direkli4	AlborzBezoar4	72647	1012807	-0.866144	-0.866144	0.00315982	-274.112
Iranian19	Direkli4	AlborzBezoar4	72789	1012985	-0.865922	-0.865922	0.00324088	-267.187
Iranian4	Direkli4	AlborzBezoar4	72715	1012216	-0.865955	-0.865955	0.00323276	-267.869
Iranian22	Direkli4	AlborzBezoar4	73137	1011537	-0.865145	-0.865145	0.00325076	-266.136
Iranian21	Direkli4	AlborzBezoar4	72167	1009956	-0.86662	-0.86662	0.00321379	-269.657
Abdul4	Direkli4	AzerbaijanBezoar1	62138	868908	-0.86652	-0.86652	0.00318877	-271.741
Blagotin3	Direkli4	AzerbaijanBezoar1	75751	1003927	-0.859679	-0.859679	0.00338077	-254.285
Direkli1-2	Direkli4	AzerbaijanBezoar1	70779	1033294	-0.871786	-0.871786	0.00311199	-280.138
Direkli5	Direkli4	AzerbaijanBezoar1	13501	222915	-0.885786	-0.885786	0.00290984	-304.411
Direkli6	Direkli4	AzerbaijanBezoar1	58422	898323	-0.877873	-0.877873	0.00298278	-294.314
Hovk1	Direkli4	AzerbaijanBezoar1	59708	968520	-0.883862	-0.883862	0.00295433	-299.175
Semnan3	Direkli4	AzerbaijanBezoar1	79770	1005230	-0.852958	-0.852958	0.00350135	-243.608
Moroccan8	Direkli4	AzerbaijanBezoar1	75891	1009011	-0.860096	-0.860096	0.00338243	-254.284
Moroccan3	Direkli4	AzerbaijanBezoar1	75926	1008184	-0.859929	-0.859929	0.00331388	-259.493
Tog	Direkli4	AzerbaijanBezoar1	81010	1007690	-0.85118	-0.85118	0.00341181	-249.481
Ethiopian1	Direkli4	AzerbaijanBezoar1	76450	1009102	-0.85915	-0.85915	0.00338039	-254.157
Sudanese6	Direkli4	AzerbaijanBezoar1	76905	1006342	-0.85801	-0.85801	0.00324049	-264.778
Nigerian2	Direkli4	AzerbaijanBezoar1	75663	1004870	-0.859952	-0.859952	0.00338145	-254.315
Aerbasi1	Direkli4	AzerbaijanBezoar1	55905	764175	-0.86366	-0.86366	0.00330009	-261.708
Alashan3	Direkli4	AzerbaijanBezoar1	69840	945329	-0.862407	-0.862407	0.00331393	-260.237
CHIR1	Direkli4	AzerbaijanBezoar1	80329	1008319	-0.852424	-0.852424	0.00361494	-235.806
Bangladeshi7	Direkli4	AzerbaijanBezoar1	77214	1005855	-0.857416	-0.857416	0.00347151	-246.986
Bangladeshi2	Direkli4	AzerbaijanBezoar1	77772	1005475	-0.85641	-0.85641	0.00344164	-248.838
Pakistani3	Direkli4	AzerbaijanBezoar1	78258	1007800	-0.855886	-0.855886	0.00347496	-246.301
Swiss2	Direkli4	AzerbaijanBezoar1	77252	1010272	-0.857931	-0.857931	0.00334418	-256.545
IOG	Direkli4	AzerbaijanBezoar1	76819	1010133	-0.858653	-0.858653	0.0032928	-260.767
French6	Direkli4	AzerbaijanBezoar1	75770	1008695	-0.860263	-0.860263	0.00337903	-254.588
Dutch1	Direkli4	AzerbaijanBezoar1	74894	1006213	-0.861449	-0.861449	0.00331961	-259.503
Italian1	Direkli4	AzerbaijanBezoar1	75714	1009828	-0.860505	-0.860505	0.0032793	-262.405
French2	Direkli4	AzerbaijanBezoar1	76244	1010690	-0.859708	-0.859708	0.00335014	-256.619
AlborzBezoar3	Direkli4	AzerbaijanBezoar1	68523	1045853	-0.87702	-0.87702	0.00298614	-293.697
AlborzBezoar2	Direkli4	AzerbaijanBezoar1	69184	1050398	-0.876411	-0.876411	0.00308171	-284.391
ZagrosBezoar2	Direkli4	AzerbaijanBezoar1	74299	1019049	-0.864089	-0.864089	0.00330936	-261.105
ZagrosBezoar3	Direkli4	AzerbaijanBezoar1	73687	1021179	-0.865395	-0.865395	0.0032695	-264.688
AlborzBezoar4	Direkli4	AzerbaijanBezoar1	68072	1052711	-0.878528	-0.878528	0.00298211	-294.599
ZagrosBezoar4	Direkli4	AzerbaijanBezoar1	72641	1015663	-0.866506	-0.866506	0.00326976	-265.006
AzerbaijanBezoar5	Direkli4	AzerbaijanBezoar1	55907	1130001	-0.905714	-0.905714	0.00241913	-374.397
AzerbaijanBezoar6	Direkli4	AzerbaijanBezoar1	54305	1138549	-0.908949	-0.908949	0.00232583	-390.806
MarkaziBezoar1	Direkli4	AzerbaijanBezoar1	76461	1011268	-0.859412	-0.859412	0.00341754	-251.47
AzerbaijanBezoar10	Direkli4	AzerbaijanBezoar1	56357	1134130	-0.905321	-0.905321	0.00242494	-373.337
AlborzBezoar1	Direkli4	AzerbaijanBezoar1	69027	1045467	-0.876128	-0.876128	0.00303944	-288.253
AlborzBezoar5	Direkli4	AzerbaijanBezoar1	69270	1050410	-0.876268	-0.876268	0.00301382	-290.75
AlborzBezoar6	Direkli4	AzerbaijanBezoar1	69290	1045731	-0.875715	-0.875715	0.00301744	-290.218
MarkaziBezoar2	Direkli4	AzerbaijanBezoar1	80934	997559	-0.849913	-0.849913	0.00364682	-233.056
MarkaziBezoar3	Direkli4	AzerbaijanBezoar1	78428	1003312	-0.854997	-0.854997	0.00349773	-244.443
Iranian11	Direkli4	AzerbaijanBezoar1	76708	1009522	-0.858763	-0.858763	0.00339302	-253.097
Iranian16	Direkli4	AzerbaijanBezoar1	76691	1010441	-0.858911	-0.858911	0.00340592	-252.182
Iranian18	Direkli4	AzerbaijanBezoar1	76247	1010163	-0.859635	-0.859635	0.003336	-257.685
Iranian19	Direkli4	AzerbaijanBezoar1	76145	1009698	-0.85975	-0.85975	0.00337733	-254.565
Iranian4	Direkli4	AzerbaijanBezoar1	76242	1009947	-0.859616	-0.859616	0.00336183	-255.699
Iranian22	Direkli4	AzerbaijanBezoar1	77042	1008144	-0.858011	-0.858011	0.00344105	-249.346
Iranian21	Direkli4	AzerbaijanBezoar1	76035	1006162	-0.85948	-0.85948	0.00334847	-256.678
Abdul4	Direkli4	ZagrosBezoar4	53314	868563	-0.884336	-0.884336	0.00274513	-322.147
Blagotin3	Direkli4	ZagrosBezoar4	67204	991253	-0.873015	-0.873015	0.00302313	-288.779
Direkli1-2	Direkli4	ZagrosBezoar4	65940	994936	-0.875688	-0.875688	0.0030069	-291.226
Direkli5	Direkli4	ZagrosBezoar4	12746	214758	-0.887949	-0.887949	0.00282575	-314.235
Direkli6	Direkli4	ZagrosBezoar4	53966	868534	-0.883	-0.883	0.00277782	-317.875
Hovk1	Direkli4	ZagrosBezoar4	57157	923638	-0.883448	-0.883448	0.00289353	-305.318
Semnan3	Direkli4	ZagrosBezoar4	67889	1010856	-0.874133	-0.874133	0.00299392	-291.969
Moroccan8	Direkli4	ZagrosBezoar4	65862	1005467	-0.877046	-0.877046	0.0029399	-298.325
Moroccan3	Direkli4	ZagrosBezoar4	65914	1004557	-0.87685	-0.87685	0.00300019	-292.265
Tog	Direkli4	ZagrosBezoar4	70707	1002949	-0.868287	-0.868287	0.00300325	-289.116
Ethiopian1	Direkli4	ZagrosBezoar4	66249	1006694	-0.87651	-0.87651	0.00294704	-297.421
Sudanese6	Direkli4	ZagrosBezoar4	66624	1004657	-0.875618	-0.875618	0.00283978	-308.341
Nigerian2	Direkli4	ZagrosBezoar4	65815	1001120	-0.876628	-0.876628	0.00294144	-298.026
Aerbasi1	Direkli4	ZagrosBezoar4	47162	769842	-0.884549	-0.884549	0.00279749	-316.194
Alashan3	Direkli4	ZagrosBezoar4	59216	951507	-0.882825	-0.882825	0.00280976	-314.199
CHIR1	Direkli4	ZagrosBezoar4	68361	1015266	-0.873829	-0.873829	0.00311453	-280.566
Bangladeshi7	Direkli4	ZagrosBezoar4	64955	1013856	-0.87958	-0.87958	0.00291414	-301.832
Bangladeshi2	Direkli4	ZagrosBezoar4	65493	1013118	-0.87856	-0.87856	0.00288805	-304.205
Pakistani3	Direkli4	ZagrosBezoar4	66423	1013595	-0.876996	-0.876996	0.002951	-297.187
Swiss2	Direkli4	ZagrosBezoar4	67777	1000112	-0.873064	-0.873064	0.00298539	-292.446
IOG	Direkli4	ZagrosBezoar4	67609	1000399	-0.873392	-0.873392	0.00296615	-294.454
French6	Direkli4	ZagrosBezoar4	66584	999522	-0.875089	-0.875089	0.00304239	-287.632
Dutch1	Direkli4	ZagrosBezoar4	65022	998731	-0.87775	-0.87775	0.002924	-300.188
Italian1	Direkli4	ZagrosBezoar4	66491	1001005	-0.875426	-0.875426	0.00295705	-296.047
French2	Direkli4	ZagrosBezoar4	66485	1001264	-0.875467	-0.875467	0.0029502	-296.748
AlborzBezoar3	Direkli4	ZagrosBezoar4	62741	1013179	-0.883372	-0.883372	0.00283892	-311.165
AlborzBezoar2	Direkli4	ZagrosBezoar4	63698	1015791	-0.881985	-0.881985	0.00289968	-304.166
ZagrosBezoar2	Direkli4	ZagrosBezoar4	42969	1188109	-0.930193	-0.930193	0.00236836	-392.758
ZagrosBezoar3	Direkli4	ZagrosBezoar4	42035	1184985	-0.931484	-0.931484	0.00203248	-458.299
AlborzBezoar4	Direkli4	ZagrosBezoar4	63079	1017348	-0.883233	-0.883233	0.00283722	-311.302
AzerbaijanBezoar1	Direkli4	ZagrosBezoar4	62656	1015663	-0.88379	-0.88379	0.00289037	-305.771
AzerbaijanBezoar5	Direkli4	ZagrosBezoar4	62048	1013167	-0.884585	-0.884585	0.00280226	-315.668
AzerbaijanBezoar6	Direkli4	ZagrosBezoar4	61747	1014097	-0.885212	-0.885212	0.00282211	-313.671
MarkaziBezoar1	Direkli4	ZagrosBezoar4	64636	1021621	-0.880993	-0.880993	0.00288676	-305.184
AzerbaijanBezoar10	Direkli4	ZagrosBezoar4	63124	1015649	-0.882971	-0.882971	0.00291617	-302.785
AlborzBezoar1	Direkli4	ZagrosBezoar4	63396	1012163	-0.882115	-0.882115	0.00285144	-309.358
AlborzBezoar5	Direkli4	ZagrosBezoar4	63629	1015893	-0.882116	-0.882116	0.00286203	-308.214
AlborzBezoar6	Direkli4	ZagrosBezoar4	63834	1012102	-0.881342	-0.881342	0.00284043	-310.285
MarkaziBezoar2	Direkli4	ZagrosBezoar4	67346	1013615	-0.875396	-0.875396	0.00303603	-288.336
MarkaziBezoar3	Direkli4	ZagrosBezoar4	65689	1016102	-0.878555	-0.878555	0.00292776	-300.078
Iranian11	Direkli4	ZagrosBezoar4	65435	1011082	-0.878432	-0.878432	0.0029239	-300.432
Iranian16	Direkli4	ZagrosBezoar4	65729	1012036	-0.878027	-0.878027	0.00296736	-295.895
Iranian18	Direkli4	ZagrosBezoar4	65016	1012597	-0.879333	-0.879333	0.00288263	-305.045
Iranian19	Direkli4	ZagrosBezoar4	65148	1012515	-0.879094	-0.879094	0.00289939	-303.2
Iranian4	Direkli4	ZagrosBezoar4	65113	1011840	-0.879079	-0.879079	0.00289431	-303.727
Iranian22	Direkli4	ZagrosBezoar4	65640	1011122	-0.878079	-0.878079	0.00296141	-296.507
Iranian21	Direkli4	ZagrosBezoar4	64424	1010678	-0.880153	-0.880153	0.00290928	-302.533
Abdul4	Direkli4	AzerbaijanBezoar5	60905	865840	-0.868561	-0.868561	0.00307944	-282.052
Blagotin3	Direkli4	AzerbaijanBezoar5	74331	1000319	-0.861665	-0.861665	0.00333489	-258.379
Direkli1-2	Direkli4	AzerbaijanBezoar5	69658	1029591	-0.873263	-0.873263	0.00305381	-285.958
Direkli5	Direkli4	AzerbaijanBezoar5	13187	221998	-0.887858	-0.887858	0.0028286	-313.886
Direkli6	Direkli4	AzerbaijanBezoar5	57494	895324	-0.879318	-0.879318	0.00295633	-297.436
Hovk1	Direkli4	AzerbaijanBezoar5	58452	966481	-0.88594	-0.88594	0.00287848	-307.78
Semnan3	Direkli4	AzerbaijanBezoar5	78181	1001999	-0.855244	-0.855244	0.00346518	-246.811
Moroccan8	Direkli4	AzerbaijanBezoar5	74232	1007384	-0.862739	-0.862739	0.00327641	-263.318
Moroccan3	Direkli4	AzerbaijanBezoar5	74373	1005497	-0.862256	-0.862256	0.00325228	-265.123
Tog	Direkli4	AzerbaijanBezoar5	79469	1004288	-0.853345	-0.853345	0.00333743	-255.689
Ethiopian1	Direkli4	AzerbaijanBezoar5	74631	1005651	-0.861831	-0.861831	0.0032825	-262.553
Sudanese6	Direkli4	AzerbaijanBezoar5	75495	1003562	-0.860072	-0.860072	0.00319633	-269.082
Nigerian2	Direkli4	AzerbaijanBezoar5	74200	1001951	-0.862101	-0.862101	0.00328095	-262.76
Aerbasi1	Direkli4	AzerbaijanBezoar5	54740	762840	-0.866093	-0.866093	0.00319817	-270.808
Alashan3	Direkli4	AzerbaijanBezoar5	68486	942909	-0.864571	-0.864571	0.00318058	-271.828
CHIR1	Direkli4	AzerbaijanBezoar5	78569	1005552	-0.855055	-0.855055	0.00348206	-245.56
Bangladeshi7	Direkli4	AzerbaijanBezoar5	75652	1003404	-0.859781	-0.859781	0.0033229	-258.744
Bangladeshi2	Direkli4	AzerbaijanBezoar5	76028	1003044	-0.859086	-0.859086	0.00330891	-259.628
Pakistani3	Direkli4	AzerbaijanBezoar5	76657	1004174	-0.858152	-0.858152	0.00338765	-253.318
Swiss2	Direkli4	AzerbaijanBezoar5	75963	1006733	-0.859678	-0.859678	0.00330306	-260.267
IOG	Direkli4	AzerbaijanBezoar5	75441	1006550	-0.860552	-0.860552	0.00322729	-266.648
French6	Direkli4	AzerbaijanBezoar5	74295	1005846	-0.862435	-0.862435	0.00330082	-261.279
Dutch1	Direkli4	AzerbaijanBezoar5	73595	1002856	-0.863264	-0.863264	0.00327704	-263.428
Italian1	Direkli4	AzerbaijanBezoar5	74389	1006332	-0.862335	-0.862335	0.00324886	-265.427
French2	Direkli4	AzerbaijanBezoar5	74526	1007582	-0.862258	-0.862258	0.00326875	-263.788
AlborzBezoar3	Direkli4	AzerbaijanBezoar5	67062	1043404	-0.879218	-0.879218	0.0028963	-303.566
AlborzBezoar2	Direkli4	AzerbaijanBezoar5	67744	1047175	-0.878477	-0.878477	0.00298702	-294.098
ZagrosBezoar2	Direkli4	AzerbaijanBezoar5	72935	1016734	-0.866134	-0.866134	0.00320902	-269.906
ZagrosBezoar3	Direkli4	AzerbaijanBezoar5	72204	1017531	-0.867483	-0.867483	0.00315532	-274.927
AlborzBezoar4	Direkli4	AzerbaijanBezoar5	67431	1048340	-0.879131	-0.879131	0.0029644	-296.562
AzerbaijanBezoar1	Direkli4	AzerbaijanBezoar5	54867	1130001	-0.907387	-0.907387	0.0023641	-383.82
ZagrosBezoar4	Direkli4	AzerbaijanBezoar5	71097	1013167	-0.868857	-0.868857	0.00315002	-275.826
AzerbaijanBezoar6	Direkli4	AzerbaijanBezoar5	52743	1136822	-0.911324	-0.911324	0.00228931	-398.077
MarkaziBezoar1	Direkli4	AzerbaijanBezoar5	74970	1009072	-0.861684	-0.861684	0.0032965	-261.393
AzerbaijanBezoar10	Direkli4	AzerbaijanBezoar5	54388	1136920	-0.908692	-0.908692	0.00238117	-381.616
AlborzBezoar1	Direkli4	AzerbaijanBezoar5	67621	1042314	-0.878153	-0.878153	0.00298061	-294.622
AlborzBezoar5	Direkli4	AzerbaijanBezoar5	67844	1046999	-0.87829	-0.87829	0.00293775	-298.966
AlborzBezoar6	Direkli4	AzerbaijanBezoar5	67872	1043095	-0.877815	-0.877815	0.00294031	-298.545
MarkaziBezoar2	Direkli4	AzerbaijanBezoar5	79381	994116	-0.852108	-0.852108	0.00351106	-242.692
MarkaziBezoar3	Direkli4	AzerbaijanBezoar5	76995	1000186	-0.857043	-0.857043	0.00337883	-253.651
Iranian11	Direkli4	AzerbaijanBezoar5	75146	1006563	-0.861061	-0.861061	0.00332752	-258.77
Iranian16	Direkli4	AzerbaijanBezoar5	75387	1007210	-0.860729	-0.860729	0.00334278	-257.489
Iranian18	Direkli4	AzerbaijanBezoar5	74630	1006952	-0.861998	-0.861998	0.00326287	-264.185
Iranian19	Direkli4	AzerbaijanBezoar5	74657	1007006	-0.861959	-0.861959	0.00328319	-262.537
Iranian4	Direkli4	AzerbaijanBezoar5	74525	1007361	-0.862231	-0.862231	0.00327586	-263.207
Iranian22	Direkli4	AzerbaijanBezoar5	75302	1005177	-0.860614	-0.860614	0.00332111	-259.134
Iranian21	Direkli4	AzerbaijanBezoar5	74615	1003047	-0.861524	-0.861524	0.00328947	-261.903
Abdul4	Direkli4	AzerbaijanBezoar6	60923	866885	-0.868673	-0.868673	0.00313482	-277.104
Blagotin3	Direkli4	AzerbaijanBezoar6	74385	1002481	-0.861849	-0.861849	0.00330073	-261.109
Direkli1-2	Direkli4	AzerbaijanBezoar6	69749	1030596	-0.873223	-0.873223	0.00308573	-282.988
Direkli5	Direkli4	AzerbaijanBezoar6	13403	222481	-0.886359	-0.886359	0.00286749	-309.106
Direkli6	Direkli4	AzerbaijanBezoar6	57620	896565	-0.879227	-0.879227	0.00297359	-295.679
Hovk1	Direkli4	AzerbaijanBezoar6	58534	967628	-0.885917	-0.885917	0.00289562	-305.95
Semnan3	Direkli4	AzerbaijanBezoar6	78538	1002671	-0.854722	-0.854722	0.00347636	-245.867
Moroccan8	Direkli4	AzerbaijanBezoar6	74286	1008194	-0.862749	-0.862749	0.00330895	-260.732
Moroccan3	Direkli4	AzerbaijanBezoar6	74624	1006734	-0.861981	-0.861981	0.00332585	-259.176
Tog	Direkli4	AzerbaijanBezoar6	79648	1005935	-0.853262	-0.853262	0.00339857	-251.065
Ethiopian1	Direkli4	AzerbaijanBezoar6	74903	1006712	-0.861498	-0.861498	0.00332869	-258.81
Sudanese6	Direkli4	AzerbaijanBezoar6	75771	1005127	-0.8598	-0.8598	0.00321464	-267.464
Nigerian2	Direkli4	AzerbaijanBezoar6	74186	1003755	-0.862356	-0.862356	0.0033383	-258.322
Aerbasi1	Direkli4	AzerbaijanBezoar6	54818	763214	-0.865976	-0.865976	0.00321772	-269.127
Alashan3	Direkli4	AzerbaijanBezoar6	68472	944028	-0.864747	-0.864747	0.00322749	-267.932
CHIR1	Direkli4	AzerbaijanBezoar6	78753	1006712	-0.854895	-0.854895	0.00355366	-240.568
Bangladeshi7	Direkli4	AzerbaijanBezoar6	75438	1004555	-0.860299	-0.860299	0.00336636	-255.558
Bangladeshi2	Direkli4	AzerbaijanBezoar6	76066	1005203	-0.859302	-0.859302	0.00337344	-254.726
Pakistani3	Direkli4	AzerbaijanBezoar6	76979	1005607	-0.857787	-0.857787	0.00339928	-252.344
Swiss2	Direkli4	AzerbaijanBezoar6	76061	1008595	-0.859751	-0.859751	0.0033035	-260.254
IOG	Direkli4	AzerbaijanBezoar6	75436	1008811	-0.860851	-0.860851	0.0032378	-265.875
French6	Direkli4	AzerbaijanBezoar6	74227	1007258	-0.862731	-0.862731	0.00333188	-258.932
Dutch1	Direkli4	AzerbaijanBezoar6	73890	1004054	-0.862906	-0.862906	0.003272	-263.724
Italian1	Direkli4	AzerbaijanBezoar6	74373	1008485	-0.862636	-0.862636	0.00322875	-267.173
French2	Direkli4	AzerbaijanBezoar6	74700	1009256	-0.862171	-0.862171	0.00329248	-261.86
AlborzBezoar3	Direkli4	AzerbaijanBezoar6	67336	1044461	-0.87887	-0.87887	0.00295338	-297.581
AlborzBezoar2	Direkli4	AzerbaijanBezoar6	67764	1049076	-0.878651	-0.878651	0.00296389	-296.452
ZagrosBezoar2	Direkli4	AzerbaijanBezoar6	72826	1017453	-0.866409	-0.866409	0.0032297	-268.262
ZagrosBezoar3	Direkli4	AzerbaijanBezoar6	72179	1018619	-0.867658	-0.867658	0.00321285	-270.058
AlborzBezoar4	Direkli4	AzerbaijanBezoar6	67437	1051136	-0.879423	-0.879423	0.00297977	-295.131
AzerbaijanBezoar1	Direkli4	AzerbaijanBezoar6	53783	1138549	-0.909785	-0.909785	0.00230469	-394.754
ZagrosBezoar4	Direkli4	AzerbaijanBezoar6	71162	1014097	-0.868857	-0.868857	0.003192	-272.199
AzerbaijanBezoar5	Direkli4	AzerbaijanBezoar6	53166	1136822	-0.910644	-0.910644	0.00233935	-389.272
MarkaziBezoar1	Direkli4	AzerbaijanBezoar6	75101	1009181	-0.861473	-0.861473	0.00335834	-256.518
AzerbaijanBezoar10	Direkli4	AzerbaijanBezoar6	53813	1142243	-0.910016	-0.910016	0.00227417	-400.153
AlborzBezoar1	Direkli4	AzerbaijanBezoar6	67666	1043957	-0.878257	-0.878257	0.0029946	-293.28
AlborzBezoar5	Direkli4	AzerbaijanBezoar6	67860	1048889	-0.878469	-0.878469	0.0029447	-298.322
AlborzBezoar6	Direkli4	AzerbaijanBezoar6	68085	1043875	-0.877541	-0.877541	0.00293785	-298.702
MarkaziBezoar2	Direkli4	AzerbaijanBezoar6	79319	995833	-0.852451	-0.852451	0.00359836	-236.9
MarkaziBezoar3	Direkli4	AzerbaijanBezoar6	76810	1001875	-0.857586	-0.857586	0.00338498	-253.35
Iranian11	Direkli4	AzerbaijanBezoar6	75624	1007814	-0.8604	-0.8604	0.00341305	-252.091
Iranian16	Direkli4	AzerbaijanBezoar6	75200	1008936	-0.861272	-0.861272	0.00337446	-255.232
Iranian18	Direkli4	AzerbaijanBezoar6	74990	1008498	-0.861577	-0.861577	0.00331422	-259.964
Iranian19	Direkli4	AzerbaijanBezoar6	74668	1008639	-0.862148	-0.862148	0.00333221	-258.732
Iranian4	Direkli4	AzerbaijanBezoar6	74928	1009337	-0.86179	-0.86179	0.00333581	-258.345
Iranian22	Direkli4	AzerbaijanBezoar6	75462	1006599	-0.860522	-0.860522	0.00339692	-253.324
Iranian21	Direkli4	AzerbaijanBezoar6	74386	1004216	-0.86207	-0.86207	0.00333226	-258.704
Abdul4	Direkli4	MarkaziBezoar1	53022	875278	-0.885765	-0.885765	0.00258257	-342.978
Blagotin3	Direkli4	MarkaziBezoar1	67413	996095	-0.873225	-0.873225	0.00291407	-299.659
Direkli1-2	Direkli4	MarkaziBezoar1	67221	994378	-0.873359	-0.873359	0.00294253	-296.805
Direkli5	Direkli4	MarkaziBezoar1	12809	214035	-0.887068	-0.887068	0.00274287	-323.409
Direkli6	Direkli4	MarkaziBezoar1	54945	867065	-0.880815	-0.880815	0.00272644	-323.065
Hovk1	Direkli4	MarkaziBezoar1	58212	919187	-0.880884	-0.880884	0.00290273	-303.467
Semnan3	Direkli4	MarkaziBezoar1	67165	1022506	-0.876724	-0.876724	0.00281334	-311.632
Moroccan8	Direkli4	MarkaziBezoar1	65488	1012709	-0.878523	-0.878523	0.0027747	-316.619
Moroccan3	Direkli4	MarkaziBezoar1	65393	1012888	-0.878709	-0.878709	0.00280691	-313.052
Tog	Direkli4	MarkaziBezoar1	70497	1011495	-0.86969	-0.86969	0.00286846	-303.19
Ethiopian1	Direkli4	MarkaziBezoar1	65695	1014684	-0.878385	-0.878385	0.00282075	-311.401
Sudanese6	Direkli4	MarkaziBezoar1	66536	1012284	-0.87665	-0.87665	0.00269987	-324.701
Nigerian2	Direkli4	MarkaziBezoar1	65235	1008425	-0.878481	-0.878481	0.00280301	-313.406
Aerbasi1	Direkli4	MarkaziBezoar1	46380	776505	-0.887275	-0.887275	0.00259733	-341.61
Alashan3	Direkli4	MarkaziBezoar1	58398	960482	-0.885368	-0.885368	0.0026249	-337.295
CHIR1	Direkli4	MarkaziBezoar1	67592	1027911	-0.876601	-0.876601	0.00290492	-301.764
Bangladeshi7	Direkli4	MarkaziBezoar1	64264	1025721	-0.882083	-0.882083	0.00275827	-319.796
Bangladeshi2	Direkli4	MarkaziBezoar1	64478	1025221	-0.881659	-0.881659	0.00268189	-328.746
Pakistani3	Direkli4	MarkaziBezoar1	65783	1026152	-0.879511	-0.879511	0.00280022	-314.086
Swiss2	Direkli4	MarkaziBezoar1	68074	1005273	-0.873156	-0.873156	0.00286704	-304.55
IOG	Direkli4	MarkaziBezoar1	67489	1007882	-0.874482	-0.874482	0.00283274	-308.705
French6	Direkli4	MarkaziBezoar1	66459	1006095	-0.876073	-0.876073	0.00289146	-302.986
Dutch1	Direkli4	MarkaziBezoar1	65164	1005837	-0.878312	-0.878312	0.0027787	-316.087
Italian1	Direkli4	MarkaziBezoar1	66429	1006686	-0.876194	-0.876194	0.00280786	-312.05
French2	Direkli4	MarkaziBezoar1	66482	1007607	-0.876208	-0.876208	0.00283164	-309.435
AlborzBezoar3	Direkli4	MarkaziBezoar1	63605	1013686	-0.881917	-0.881917	0.00273169	-322.847
AlborzBezoar2	Direkli4	MarkaziBezoar1	64089	1016522	-0.881384	-0.881384	0.00279814	-314.989
ZagrosBezoar2	Direkli4	MarkaziBezoar1	63345	1027223	-0.883831	-0.883831	0.00270133	-327.183
ZagrosBezoar3	Direkli4	MarkaziBezoar1	62792	1027134	-0.884777	-0.884777	0.00269263	-328.592
AlborzBezoar4	Direkli4	MarkaziBezoar1	63682	1017553	-0.882205	-0.882205	0.00277564	-317.838
AzerbaijanBezoar1	Direkli4	MarkaziBezoar1	63752	1011268	-0.881394	-0.881394	0.00279074	-315.828
ZagrosBezoar4	Direkli4	MarkaziBezoar1	62288	1021621	-0.885068	-0.885068	0.00266883	-331.632
AzerbaijanBezoar5	Direkli4	MarkaziBezoar1	63357	1009072	-0.881844	-0.881844	0.00272535	-323.571
AzerbaijanBezoar6	Direkli4	MarkaziBezoar1	63082	1009181	-0.882339	-0.882339	0.00275063	-320.777
AzerbaijanBezoar10	Direkli4	MarkaziBezoar1	64330	1011450	-0.880403	-0.880403	0.00283437	-310.617
AlborzBezoar1	Direkli4	MarkaziBezoar1	63942	1013098	-0.881263	-0.881263	0.00276062	-319.227
AlborzBezoar5	Direkli4	MarkaziBezoar1	64337	1017141	-0.88102	-0.88102	0.00282786	-311.551
AlborzBezoar6	Direkli4	MarkaziBezoar1	64429	1012892	-0.88039	-0.88039	0.00272329	-323.283
MarkaziBezoar2	Direkli4	MarkaziBezoar1	65263	1033056	-0.881158	-0.881158	0.0027165	-324.373
MarkaziBezoar3	Direkli4	MarkaziBezoar1	63552	1035831	-0.884386	-0.884386	0.00262957	-336.324
Iranian11	Direkli4	MarkaziBezoar1	64971	1020316	-0.88027	-0.88027	0.00280549	-313.767
Iranian16	Direkli4	MarkaziBezoar1	65308	1022507	-0.879928	-0.879928	0.00282914	-311.024
Iranian18	Direkli4	MarkaziBezoar1	64507	1022347	-0.881296	-0.881296	0.00271115	-325.063
Iranian19	Direkli4	MarkaziBezoar1	64361	1022276	-0.881541	-0.881541	0.00271174	-325.083
Iranian4	Direkli4	MarkaziBezoar1	64596	1021377	-0.881036	-0.881036	0.00270724	-325.437
Iranian22	Direkli4	MarkaziBezoar1	64987	1020685	-0.880282	-0.880282	0.00276084	-318.846
Iranian21	Direkli4	MarkaziBezoar1	63471	1021157	-0.882963	-0.882963	0.00273047	-323.374
Abdul4	Direkli4	AzerbaijanBezoar10	61971	868288	-0.866766	-0.866766	0.00317816	-272.726
Blagotin3	Direkli4	AzerbaijanBezoar10	75515	1004912	-0.860213	-0.860213	0.00331975	-259.12
Direkli1-2	Direkli4	AzerbaijanBezoar10	70988	1032855	-0.87138	-0.87138	0.00313694	-277.78
Direkli5	Direkli4	AzerbaijanBezoar10	13590	222493	-0.884871	-0.884871	0.00290339	-304.772
Direkli6	Direkli4	AzerbaijanBezoar10	58414	898554	-0.877919	-0.877919	0.00300099	-292.543
Hovk1	Direkli4	AzerbaijanBezoar10	59227	970550	-0.884971	-0.884971	0.00297243	-297.726
Semnan3	Direkli4	AzerbaijanBezoar10	79424	1005383	-0.85357	-0.85357	0.00349727	-244.068
Moroccan8	Direkli4	AzerbaijanBezoar10	75538	1009829	-0.860807	-0.860807	0.00337533	-255.029
Moroccan3	Direkli4	AzerbaijanBezoar10	75726	1008826	-0.860355	-0.860355	0.00338403	-254.24
Tog	Direkli4	AzerbaijanBezoar10	81190	1007882	-0.850901	-0.850901	0.00343078	-248.02
Ethiopian1	Direkli4	AzerbaijanBezoar10	76031	1008701	-0.859816	-0.859816	0.0033726	-254.942
Sudanese6	Direkli4	AzerbaijanBezoar10	76905	1005836	-0.857944	-0.857944	0.00326116	-263.079
Nigerian2	Direkli4	AzerbaijanBezoar10	75604	1004965	-0.860066	-0.860066	0.00337205	-255.058
Aerbasi1	Direkli4	AzerbaijanBezoar10	55444	764295	-0.864728	-0.864728	0.0033099	-261.255
Alashan3	Direkli4	AzerbaijanBezoar10	69623	944923	-0.86275	-0.86275	0.00330395	-261.127
CHIR1	Direkli4	AzerbaijanBezoar10	79936	1008728	-0.853148	-0.853148	0.00361805	-235.804
Bangladeshi7	Direkli4	AzerbaijanBezoar10	76879	1006463	-0.858071	-0.858071	0.00348436	-246.264
Bangladeshi2	Direkli4	AzerbaijanBezoar10	77412	1006290	-0.857134	-0.857134	0.00346226	-247.565
Pakistani3	Direkli4	AzerbaijanBezoar10	78394	1007244	-0.85558	-0.85558	0.00349182	-245.024
Swiss2	Direkli4	AzerbaijanBezoar10	77426	1010042	-0.857603	-0.857603	0.00337803	-253.876
IOG	Direkli4	AzerbaijanBezoar10	76921	1010576	-0.858536	-0.858536	0.00327844	-261.873
French6	Direkli4	AzerbaijanBezoar10	75768	1008730	-0.860271	-0.860271	0.00337567	-254.844
Dutch1	Direkli4	AzerbaijanBezoar10	74946	1006130	-0.861349	-0.861349	0.00334563	-257.455
Italian1	Direkli4	AzerbaijanBezoar10	75840	1009865	-0.860294	-0.860294	0.00330323	-260.44
French2	Direkli4	AzerbaijanBezoar10	76284	1010479	-0.859612	-0.859612	0.0033746	-254.73
AlborzBezoar3	Direkli4	AzerbaijanBezoar10	68692	1046033	-0.876755	-0.876755	0.00304824	-287.627
AlborzBezoar2	Direkli4	AzerbaijanBezoar10	68782	1050591	-0.877106	-0.877106	0.00307382	-285.347
ZagrosBezoar2	Direkli4	AzerbaijanBezoar10	74289	1018987	-0.864098	-0.864098	0.00332844	-259.61
ZagrosBezoar3	Direkli4	AzerbaijanBezoar10	73573	1020226	-0.865472	-0.865472	0.00327919	-263.929
AlborzBezoar4	Direkli4	AzerbaijanBezoar10	68672	1051838	-0.877427	-0.877427	0.00309077	-283.886
AzerbaijanBezoar1	Direkli4	AzerbaijanBezoar10	55810	1134130	-0.906197	-0.906197	0.00246459	-367.686
ZagrosBezoar4	Direkli4	AzerbaijanBezoar10	72503	1015649	-0.866741	-0.866741	0.00330267	-262.437
AzerbaijanBezoar5	Direkli4	AzerbaijanBezoar10	54794	1136920	-0.908042	-0.908042	0.00245657	-369.638
AzerbaijanBezoar6	Direkli4	AzerbaijanBezoar10	53795	1142243	-0.910045	-0.910045	0.00230628	-394.594
MarkaziBezoar1	Direkli4	AzerbaijanBezoar10	76344	1011450	-0.859635	-0.859635	0.0034283	-250.747
AlborzBezoar1	Direkli4	AzerbaijanBezoar10	68990	1045233	-0.876165	-0.876165	0.00306665	-285.707
AlborzBezoar5	Direkli4	AzerbaijanBezoar10	69184	1051618	-0.876545	-0.876545	0.00305674	-286.758
AlborzBezoar6	Direkli4	AzerbaijanBezoar10	69527	1045490	-0.87529	-0.87529	0.00306334	-285.73
MarkaziBezoar2	Direkli4	AzerbaijanBezoar10	80531	997991	-0.850664	-0.850664	0.00366929	-231.833
MarkaziBezoar3	Direkli4	AzerbaijanBezoar10	77995	1004391	-0.855883	-0.855883	0.00348254	-245.764
Iranian11	Direkli4	AzerbaijanBezoar10	76756	1009639	-0.858696	-0.858696	0.00345408	-248.603
Iranian16	Direkli4	AzerbaijanBezoar10	76768	1010065	-0.858731	-0.858731	0.00344084	-249.57
Iranian18	Direkli4	AzerbaijanBezoar10	76054	1010674	-0.860031	-0.860031	0.00334349	-257.225
Iranian19	Direkli4	AzerbaijanBezoar10	76237	1010119	-0.859646	-0.859646	0.00340429	-252.518
Iranian4	Direkli4	AzerbaijanBezoar10	76331	1009695	-0.859431	-0.859431	0.00341389	-251.745
Iranian22	Direkli4	AzerbaijanBezoar10	76799	1008243	-0.858441	-0.858441	0.00347567	-246.986
Iranian21	Direkli4	AzerbaijanBezoar10	75782	1005592	-0.859841	-0.859841	0.00336324	-255.659
Abdul4	Direkli4	AlborzBezoar1	58516	866099	-0.873426	-0.873426	0.00292325	-298.786
Blagotin3	Direkli4	AlborzBezoar1	72628	996624	-0.864152	-0.864152	0.0032159	-268.713
Direkli1-2	Direkli4	AlborzBezoar1	69460	1014558	-0.871847	-0.871847	0.00305785	-285.118
Direkli5	Direkli4	AlborzBezoar1	13334	219159	-0.885296	-0.885296	0.00284736	-310.918
Direkli6	Direkli4	AlborzBezoar1	56997	883895	-0.878845	-0.878845	0.00291389	-301.605
Hovk1	Direkli4	AlborzBezoar1	58453	951554	-0.884252	-0.884252	0.00290563	-304.324
Semnan3	Direkli4	AlborzBezoar1	75037	1006256	-0.861209	-0.861209	0.00324331	-265.534
Moroccan8	Direkli4	AlborzBezoar1	72166	1004911	-0.865997	-0.865997	0.00315541	-274.448
Moroccan3	Direkli4	AlborzBezoar1	71959	1004492	-0.866303	-0.866303	0.00314898	-275.106
Tog	Direkli4	AlborzBezoar1	77361	1003154	-0.856807	-0.856807	0.00324077	-264.384
Ethiopian1	Direkli4	AlborzBezoar1	72228	1005397	-0.86595	-0.86595	0.00315659	-274.33
Sudanese6	Direkli4	AlborzBezoar1	72993	1003366	-0.864371	-0.864371	0.00303913	-284.413
Nigerian2	Direkli4	AlborzBezoar1	71687	1000473	-0.866276	-0.866276	0.00313273	-276.524
Aerbasi1	Direkli4	AlborzBezoar1	52207	764538	-0.872158	-0.872158	0.00306889	-284.193
Alashan3	Direkli4	AlborzBezoar1	65878	944735	-0.869628	-0.869628	0.00310041	-280.488
CHIR1	Direkli4	AlborzBezoar1	75924	1008124	-0.859925	-0.859925	0.0033668	-255.413
Bangladeshi7	Direkli4	AlborzBezoar1	72310	1007184	-0.86603	-0.86603	0.00315059	-274.879
Bangladeshi2	Direkli4	AlborzBezoar1	72796	1007428	-0.86522	-0.86522	0.00316063	-273.749
Pakistani3	Direkli4	AlborzBezoar1	73691	1008430	-0.863803	-0.863803	0.00322335	-267.983
Swiss2	Direkli4	AlborzBezoar1	73926	1002995	-0.862709	-0.862709	0.0031961	-269.926
IOG	Direkli4	AlborzBezoar1	73529	1003616	-0.863474	-0.863474	0.00314359	-274.678
French6	Direkli4	AlborzBezoar1	72415	1002909	-0.865315	-0.865315	0.00326111	-265.344
Dutch1	Direkli4	AlborzBezoar1	71506	1000096	-0.866544	-0.866544	0.00312272	-277.497
Italian1	Direkli4	AlborzBezoar1	72431	1003132	-0.865315	-0.865315	0.00314635	-275.022
French2	Direkli4	AlborzBezoar1	72470	1004100	-0.865369	-0.865369	0.00315386	-274.384
AlborzBezoar3	Direkli4	AlborzBezoar1	61756	1063918	-0.890277	-0.890277	0.00262059	-339.724
AlborzBezoar2	Direkli4	AlborzBezoar1	61103	1078213	-0.892737	-0.892737	0.00267065	-334.277
ZagrosBezoar2	Direkli4	AlborzBezoar1	69986	1016615	-0.871184	-0.871184	0.0030546	-285.203
ZagrosBezoar3	Direkli4	AlborzBezoar1	69991	1016845	-0.871202	-0.871202	0.00304501	-286.109
AlborzBezoar4	Direkli4	AlborzBezoar1	63296	1058706	-0.887173	-0.887173	0.00268616	-330.276
AzerbaijanBezoar1	Direkli4	AlborzBezoar1	64398	1045467	-0.883953	-0.883953	0.00281025	-314.546
ZagrosBezoar4	Direkli4	AlborzBezoar1	68755	1012163	-0.872784	-0.872784	0.00301916	-289.082
AzerbaijanBezoar5	Direkli4	AlborzBezoar1	63964	1042314	-0.884362	-0.884362	0.00279123	-316.836
AzerbaijanBezoar6	Direkli4	AlborzBezoar1	63613	1043957	-0.885131	-0.885131	0.00278281	-318.07
MarkaziBezoar1	Direkli4	AlborzBezoar1	71925	1013098	-0.867422	-0.867422	0.00312478	-277.595
AzerbaijanBezoar10	Direkli4	AlborzBezoar1	64911	1045233	-0.883058	-0.883058	0.00284885	-309.97
AlborzBezoar5	Direkli4	AlborzBezoar1	61576	1073543	-0.891507	-0.891507	0.00261366	-341.096
AlborzBezoar6	Direkli4	AlborzBezoar1	63028	1063667	-0.888119	-0.888119	0.00266023	-333.85
MarkaziBezoar2	Direkli4	AlborzBezoar1	75657	1001054	-0.859467	-0.859467	0.00332499	-258.487
MarkaziBezoar3	Direkli4	AlborzBezoar1	73409	1006673	-0.864068	-0.864068	0.0032118	-269.029
Iranian11	Direkli4	AlborzBezoar1	72673	1006952	-0.865374	-0.865374	0.00322944	-267.964
Iranian16	Direkli4	AlborzBezoar1	72897	1008323	-0.865158	-0.865158	0.00323364	-267.549
Iranian18	Direkli4	AlborzBezoar1	72023	1007949	-0.866621	-0.866621	0.00312737	-277.108
Iranian19	Direkli4	AlborzBezoar1	72244	1007750	-0.866214	-0.866214	0.0031617	-273.971
Iranian4	Direkli4	AlborzBezoar1	72073	1007980	-0.866538	-0.866538	0.00318998	-271.644
Iranian22	Direkli4	AlborzBezoar1	72236	1006893	-0.866122	-0.866122	0.00315756	-274.301
Iranian21	Direkli4	AlborzBezoar1	71610	1004943	-0.866964	-0.866964	0.0031419	-275.937
Abdul4	Direkli4	AlborzBezoar5	59255	868886	-0.872315	-0.872315	0.00303184	-287.718
Blagotin3	Direkli4	AlborzBezoar5	73255	1000119	-0.863505	-0.863505	0.00331196	-260.724
Direkli1-2	Direkli4	AlborzBezoar5	69614	1019657	-0.872182	-0.872182	0.00314551	-277.279
Direkli5	Direkli4	AlborzBezoar5	13209	220017	-0.886728	-0.886728	0.00281653	-314.83
Direkli6	Direkli4	AlborzBezoar5	57395	887719	-0.878544	-0.878544	0.00298341	-294.476
Hovk1	Direkli4	AlborzBezoar5	58612	954415	-0.884283	-0.884283	0.00300309	-294.458
Semnan3	Direkli4	AlborzBezoar5	75521	1010177	-0.86088	-0.86088	0.00336612	-255.749
Moroccan8	Direkli4	AlborzBezoar5	72482	1010060	-0.866089	-0.866089	0.00328799	-263.41
Moroccan3	Direkli4	AlborzBezoar5	72624	1008421	-0.865641	-0.865641	0.00323172	-267.858
Tog	Direkli4	AlborzBezoar5	77802	1008144	-0.856711	-0.856711	0.00333109	-257.186
Ethiopian1	Direkli4	AlborzBezoar5	72729	1009737	-0.865623	-0.865623	0.00324005	-267.164
Sudanese6	Direkli4	AlborzBezoar5	73456	1007613	-0.864105	-0.864105	0.00315391	-273.979
Nigerian2	Direkli4	AlborzBezoar5	72429	1005196	-0.865577	-0.865577	0.0032611	-265.424
Aerbasi1	Direkli4	AlborzBezoar5	52714	767931	-0.87153	-0.87153	0.00322029	-270.637
Alashan3	Direkli4	AlborzBezoar5	66239	948830	-0.869489	-0.869489	0.00317482	-273.87
CHIR1	Direkli4	AlborzBezoar5	76611	1013157	-0.859399	-0.859399	0.00352345	-243.908
Bangladeshi7	Direkli4	AlborzBezoar5	72995	1010995	-0.865322	-0.865322	0.00328488	-263.426
Bangladeshi2	Direkli4	AlborzBezoar5	73575	1011602	-0.8644	-0.8644	0.00326956	-264.378
Pakistani3	Direkli4	AlborzBezoar5	74066	1012390	-0.863656	-0.863656	0.00334652	-258.075
Swiss2	Direkli4	AlborzBezoar5	74580	1006456	-0.862021	-0.862021	0.0032982	-261.361
IOG	Direkli4	AlborzBezoar5	74468	1006663	-0.862241	-0.862241	0.00326556	-264.041
French6	Direkli4	AlborzBezoar5	73321	1005930	-0.864126	-0.864126	0.00331959	-260.311
Dutch1	Direkli4	AlborzBezoar5	71976	1003322	-0.866128	-0.866128	0.00324717	-266.733
Italian1	Direkli4	AlborzBezoar5	72949	1006988	-0.864901	-0.864901	0.00321787	-268.781
French2	Direkli4	AlborzBezoar5	73282	1007062	-0.864336	-0.864336	0.00326906	-264.399
AlborzBezoar3	Direkli4	AlborzBezoar5	62329	1071694	-0.890074	-0.890074	0.00279676	-318.252
AlborzBezoar2	Direkli4	AlborzBezoar5	60855	1086117	-0.893886	-0.893886	0.00265428	-336.772
ZagrosBezoar2	Direkli4	AlborzBezoar5	70716	1020514	-0.870392	-0.870392	0.00317919	-273.778
ZagrosBezoar3	Direkli4	AlborzBezoar5	70528	1021030	-0.870776	-0.870776	0.00312945	-278.252
AlborzBezoar4	Direkli4	AlborzBezoar5	63906	1063439	-0.886626	-0.886626	0.00281126	-315.384
AzerbaijanBezoar1	Direkli4	AlborzBezoar5	64921	1050410	-0.883584	-0.883584	0.00289943	-304.744
ZagrosBezoar4	Direkli4	AlborzBezoar5	69327	1015893	-0.872234	-0.872234	0.00311009	-280.453
AzerbaijanBezoar5	Direkli4	AlborzBezoar5	64538	1046999	-0.883876	-0.883876	0.00285494	-309.596
AzerbaijanBezoar6	Direkli4	AlborzBezoar5	64111	1048889	-0.884796	-0.884796	0.0028624	-309.11
MarkaziBezoar1	Direkli4	AlborzBezoar5	72637	1017141	-0.866694	-0.866694	0.00330642	-262.124
AzerbaijanBezoar10	Direkli4	AlborzBezoar5	65446	1051618	-0.882825	-0.882825	0.00294897	-299.368
AlborzBezoar1	Direkli4	AlborzBezoar5	61896	1073543	-0.890974	-0.890974	0.00273644	-325.596
AlborzBezoar6	Direkli4	AlborzBezoar5	63061	1068102	-0.888502	-0.888502	0.00270742	-328.173
MarkaziBezoar2	Direkli4	AlborzBezoar5	76735	1005408	-0.85818	-0.85818	0.00348271	-246.412
MarkaziBezoar3	Direkli4	AlborzBezoar5	73931	1010620	-0.863665	-0.863665	0.00334905	-257.884
Iranian11	Direkli4	AlborzBezoar5	72956	1011611	-0.865465	-0.865465	0.00327055	-264.623
Iranian16	Direkli4	AlborzBezoar5	73092	1012716	-0.865368	-0.865368	0.00332646	-260.147
Iranian18	Direkli4	AlborzBezoar5	72721	1013405	-0.866091	-0.866091	0.00321913	-269.045
Iranian19	Direkli4	AlborzBezoar5	72621	1012107	-0.866103	-0.866103	0.00330023	-262.437
Iranian4	Direkli4	AlborzBezoar5	72627	1012239	-0.866109	-0.866109	0.00327494	-264.466
Iranian22	Direkli4	AlborzBezoar5	73030	1010612	-0.865214	-0.865214	0.00328456	-263.418
Iranian21	Direkli4	AlborzBezoar5	72224	1009628	-0.866481	-0.866481	0.00330105	-262.486
Abdul4	Direkli4	AlborzBezoar6	58944	865861	-0.872527	-0.872527	0.00301145	-289.737
Blagotin3	Direkli4	AlborzBezoar6	73057	996864	-0.863435	-0.863435	0.00327221	-263.869
Direkli1-2	Direkli4	AlborzBezoar6	69532	1015791	-0.871869	-0.871869	0.0031129	-280.082
Direkli5	Direkli4	AlborzBezoar6	13316	219262	-0.885492	-0.885492	0.00287202	-308.317
Direkli6	Direkli4	AlborzBezoar6	57203	884283	-0.878484	-0.878484	0.00298629	-294.172
Hovk1	Direkli4	AlborzBezoar6	58726	951095	-0.88369	-0.88369	0.00298676	-295.87
Semnan3	Direkli4	AlborzBezoar6	75331	1006244	-0.860701	-0.860701	0.00330156	-260.696
Moroccan8	Direkli4	AlborzBezoar6	72256	1005788	-0.86595	-0.86595	0.00323005	-268.091
Moroccan3	Direkli4	AlborzBezoar6	72540	1005471	-0.865419	-0.865419	0.00319609	-270.774
Tog	Direkli4	AlborzBezoar6	77568	1003225	-0.856461	-0.856461	0.00330671	-259.007
Ethiopian1	Direkli4	AlborzBezoar6	72455	1005835	-0.865611	-0.865611	0.00323096	-267.911
Sudanese6	Direkli4	AlborzBezoar6	73597	1002904	-0.863266	-0.863266	0.00314841	-274.191
Nigerian2	Direkli4	AlborzBezoar6	72412	1000626	-0.865034	-0.865034	0.00321408	-269.139
Aerbasi1	Direkli4	AlborzBezoar6	52800	764554	-0.870803	-0.870803	0.00317112	-274.604
Alashan3	Direkli4	AlborzBezoar6	66118	945224	-0.869247	-0.869247	0.00310288	-280.142
CHIR1	Direkli4	AlborzBezoar6	76413	1008448	-0.859128	-0.859128	0.0034897	-246.19
Bangladeshi7	Direkli4	AlborzBezoar6	73027	1006471	-0.864702	-0.864702	0.00326375	-264.942
Bangladeshi2	Direkli4	AlborzBezoar6	73524	1007120	-0.863926	-0.863926	0.0032707	-264.141
Pakistani3	Direkli4	AlborzBezoar6	74220	1007899	-0.862825	-0.862825	0.00332762	-259.292
Swiss2	Direkli4	AlborzBezoar6	74408	1003448	-0.861933	-0.861933	0.00328087	-262.715
IOG	Direkli4	AlborzBezoar6	74265	1004127	-0.862267	-0.862267	0.00323874	-266.236
French6	Direkli4	AlborzBezoar6	72977	1002757	-0.864321	-0.864321	0.00328151	-263.391
Dutch1	Direkli4	AlborzBezoar6	71848	999845	-0.865917	-0.865917	0.00320418	-270.246
Italian1	Direkli4	AlborzBezoar6	72920	1003457	-0.864508	-0.864508	0.00321542	-268.864
French2	Direkli4	AlborzBezoar6	73166	1004221	-0.864179	-0.864179	0.00324226	-266.536
AlborzBezoar3	Direkli4	AlborzBezoar6	60767	1071750	-0.892687	-0.892687	0.00264008	-338.129
AlborzBezoar2	Direkli4	AlborzBezoar6	62468	1068512	-0.889533	-0.889533	0.0026904	-330.633
ZagrosBezoar2	Direkli4	AlborzBezoar6	70550	1016890	-0.870246	-0.870246	0.00314574	-276.642
ZagrosBezoar3	Direkli4	AlborzBezoar6	70402	1017205	-0.870538	-0.870538	0.0031287	-278.243
AlborzBezoar4	Direkli4	AlborzBezoar6	63326	1057973	-0.887049	-0.887049	0.0027754	-319.611
AzerbaijanBezoar1	Direkli4	AlborzBezoar6	64614	1045731	-0.883615	-0.883615	0.00288873	-305.884
ZagrosBezoar4	Direkli4	AlborzBezoar6	69187	1012102	-0.872029	-0.872029	0.00309559	-281.701
AzerbaijanBezoar5	Direkli4	AlborzBezoar6	64180	1043095	-0.884076	-0.884076	0.00284112	-311.172
AzerbaijanBezoar6	Direkli4	AlborzBezoar6	64019	1043875	-0.884431	-0.884431	0.00283178	-312.323
MarkaziBezoar1	Direkli4	AlborzBezoar6	72340	1012892	-0.866683	-0.866683	0.00321549	-269.534
AzerbaijanBezoar10	Direkli4	AlborzBezoar6	65450	1045490	-0.882172	-0.882172	0.00295105	-298.935
AlborzBezoar1	Direkli4	AlborzBezoar6	63014	1063667	-0.888142	-0.888142	0.00276553	-321.147
AlborzBezoar5	Direkli4	AlborzBezoar6	62711	1068102	-0.889087	-0.889087	0.00271024	-328.047
MarkaziBezoar2	Direkli4	AlborzBezoar6	76154	1000695	-0.858561	-0.858561	0.00338696	-253.49
MarkaziBezoar3	Direkli4	AlborzBezoar6	73925	1006382	-0.863141	-0.863141	0.00329183	-262.207
Iranian11	Direkli4	AlborzBezoar6	72950	1007533	-0.864968	-0.864968	0.0032693	-264.573
Iranian16	Direkli4	AlborzBezoar6	73062	1008367	-0.864879	-0.864879	0.00329088	-262.811
Iranian18	Direkli4	AlborzBezoar6	72568	1007935	-0.865677	-0.865677	0.00317418	-272.725
Iranian19	Direkli4	AlborzBezoar6	72727	1006771	-0.865258	-0.865258	0.00328664	-263.265
Iranian4	Direkli4	AlborzBezoar6	72689	1008104	-0.86549	-0.86549	0.00324196	-266.965
Iranian22	Direkli4	AlborzBezoar6	72947	1006391	-0.86483	-0.86483	0.00328744	-263.071
Iranian21	Direkli4	AlborzBezoar6	71948	1005386	-0.866433	-0.866433	0.00323485	-267.843
Abdul4	Direkli4	MarkaziBezoar2	51566	872012	-0.888334	-0.888334	0.00245555	-361.766
Blagotin3	Direkli4	MarkaziBezoar2	65504	993614	-0.876305	-0.876305	0.00277838	-315.401
Direkli1-2	Direkli4	MarkaziBezoar2	66353	983149	-0.873553	-0.873553	0.00287843	-303.482
Direkli5	Direkli4	MarkaziBezoar2	12696	211801	-0.886894	-0.886894	0.00271678	-326.45
Direkli6	Direkli4	MarkaziBezoar2	54535	857703	-0.880437	-0.880437	0.00267319	-329.358
Hovk1	Direkli4	MarkaziBezoar2	58298	904670	-0.87892	-0.87892	0.00283032	-310.537
Semnan3	Direkli4	MarkaziBezoar2	64575	1025157	-0.881485	-0.881485	0.00265373	-332.168
Moroccan8	Direkli4	MarkaziBezoar2	63247	1012242	-0.882385	-0.882385	0.00265106	-332.842
Moroccan3	Direkli4	MarkaziBezoar2	63166	1011070	-0.882398	-0.882398	0.00265513	-332.337
Tog	Direkli4	MarkaziBezoar2	68395	1010596	-0.873224	-0.873224	0.00269972	-323.45
Ethiopian1	Direkli4	MarkaziBezoar2	63406	1013695	-0.882266	-0.882266	0.00267755	-329.504
Sudanese6	Direkli4	MarkaziBezoar2	63911	1012792	-0.881284	-0.881284	0.00252572	-348.924
Nigerian2	Direkli4	MarkaziBezoar2	63152	1007357	-0.882015	-0.882015	0.00260947	-338.006
Aerbasi1	Direkli4	MarkaziBezoar2	44509	777388	-0.891692	-0.891692	0.00246995	-361.015
Alashan3	Direkli4	MarkaziBezoar2	56169	961335	-0.889594	-0.889594	0.0024834	-358.217
CHIR1	Direkli4	MarkaziBezoar2	64770	1030720	-0.881752	-0.881752	0.00272494	-323.586
Bangladeshi7	Direkli4	MarkaziBezoar2	61476	1028653	-0.887213	-0.887213	0.00254277	-348.916
Bangladeshi2	Direkli4	MarkaziBezoar2	61870	1029212	-0.88659	-0.88659	0.00250726	-353.609
Pakistani3	Direkli4	MarkaziBezoar2	63094	1027714	-0.884317	-0.884317	0.00260206	-339.853
Swiss2	Direkli4	MarkaziBezoar2	66185	1003296	-0.87623	-0.87623	0.0027299	-320.975
IOG	Direkli4	MarkaziBezoar2	65460	1006484	-0.877867	-0.877867	0.00266553	-329.341
French6	Direkli4	MarkaziBezoar2	64271	1004419	-0.87972	-0.87972	0.00272432	-322.914
Dutch1	Direkli4	MarkaziBezoar2	63406	1002869	-0.88107	-0.88107	0.0026783	-328.966
Italian1	Direkli4	MarkaziBezoar2	64934	1003557	-0.878457	-0.878457	0.00270065	-325.276
French2	Direkli4	MarkaziBezoar2	64537	1005382	-0.879361	-0.879361	0.00270315	-325.309
AlborzBezoar3	Direkli4	MarkaziBezoar2	62708	1001840	-0.882189	-0.882189	0.00263646	-334.612
AlborzBezoar2	Direkli4	MarkaziBezoar2	63686	1004896	-0.880803	-0.880803	0.00272252	-323.525
ZagrosBezoar2	Direkli4	MarkaziBezoar2	61884	1018709	-0.885463	-0.885463	0.00258804	-342.137
ZagrosBezoar3	Direkli4	MarkaziBezoar2	61683	1018747	-0.885818	-0.885818	0.00259926	-340.796
AlborzBezoar4	Direkli4	MarkaziBezoar2	63421	1004942	-0.881274	-0.881274	0.00268773	-327.888
AzerbaijanBezoar1	Direkli4	MarkaziBezoar2	63891	997559	-0.879616	-0.879616	0.00278693	-315.622
ZagrosBezoar4	Direkli4	MarkaziBezoar2	60890	1013615	-0.886664	-0.886664	0.00257562	-344.252
AzerbaijanBezoar5	Direkli4	MarkaziBezoar2	63467	994116	-0.879977	-0.879977	0.00268037	-328.305
AzerbaijanBezoar6	Direkli4	MarkaziBezoar2	62981	995833	-0.881035	-0.881035	0.00274149	-321.371
MarkaziBezoar1	Direkli4	MarkaziBezoar2	61183	1033056	-0.888173	-0.888173	0.00249487	-356
AzerbaijanBezoar10	Direkli4	MarkaziBezoar2	64235	997991	-0.879056	-0.879056	0.00281677	-312.079
AlborzBezoar1	Direkli4	MarkaziBezoar2	63396	1001054	-0.880885	-0.880885	0.00267688	-329.071
AlborzBezoar5	Direkli4	MarkaziBezoar2	64123	1005408	-0.880091	-0.880091	0.00274119	-321.062
AlborzBezoar6	Direkli4	MarkaziBezoar2	64038	1000695	-0.879711	-0.879711	0.00266793	-329.735
MarkaziBezoar3	Direkli4	MarkaziBezoar2	60656	1039809	-0.889763	-0.889763	0.00245627	-362.241
Iranian11	Direkli4	MarkaziBezoar2	62746	1021451	-0.884254	-0.884254	0.00263802	-335.196
Iranian16	Direkli4	MarkaziBezoar2	62719	1023503	-0.884519	-0.884519	0.00263816	-335.279
Iranian18	Direkli4	MarkaziBezoar2	62272	1023546	-0.885299	-0.885299	0.00252951	-349.988
Iranian19	Direkli4	MarkaziBezoar2	62024	1022836	-0.885655	-0.885655	0.00258716	-342.327
Iranian4	Direkli4	MarkaziBezoar2	62425	1020725	-0.884734	-0.884734	0.00259518	-340.914
Iranian22	Direkli4	MarkaziBezoar2	62645	1020874	-0.884367	-0.884367	0.00259578	-340.694
Iranian21	Direkli4	MarkaziBezoar2	60964	1024342	-0.887656	-0.887656	0.00254235	-349.148
Abdul4	Direkli4	MarkaziBezoar3	52989	873454	-0.885608	-0.885608	0.0026241	-337.49
Blagotin3	Direkli4	MarkaziBezoar3	67211	994848	-0.873433	-0.873433	0.00293764	-297.325
Direkli1-2	Direkli4	MarkaziBezoar3	67347	988333	-0.87241	-0.87241	0.002996	-291.191
Direkli5	Direkli4	MarkaziBezoar3	12866	213086	-0.886117	-0.886117	0.00272589	-325.074
Direkli6	Direkli4	MarkaziBezoar3	55009	862429	-0.880081	-0.880081	0.0027958	-314.787
Hovk1	Direkli4	MarkaziBezoar3	58593	911575	-0.879211	-0.879211	0.00288759	-304.479
Semnan3	Direkli4	MarkaziBezoar3	66560	1023614	-0.877891	-0.877891	0.00282808	-310.42
Moroccan8	Direkli4	MarkaziBezoar3	64882	1012008	-0.879501	-0.879501	0.00279497	-314.673
Moroccan3	Direkli4	MarkaziBezoar3	64877	1011746	-0.879481	-0.879481	0.00279301	-314.886
Tog	Direkli4	MarkaziBezoar3	70388	1010291	-0.869734	-0.869734	0.00288316	-301.66
Ethiopian1	Direkli4	MarkaziBezoar3	65064	1015077	-0.879527	-0.879527	0.00278498	-315.811
Sudanese6	Direkli4	MarkaziBezoar3	65619	1012278	-0.878246	-0.878246	0.00266504	-329.543
Nigerian2	Direkli4	MarkaziBezoar3	65007	1007835	-0.878814	-0.878814	0.00284466	-308.935
Aerbasi1	Direkli4	MarkaziBezoar3	46253	777188	-0.887659	-0.887659	0.00261472	-339.485
Alashan3	Direkli4	MarkaziBezoar3	57517	961562	-0.88712	-0.88712	0.00264806	-335.007
CHIR1	Direkli4	MarkaziBezoar3	67135	1027941	-0.877387	-0.877387	0.00300461	-292.014
Bangladeshi7	Direkli4	MarkaziBezoar3	63437	1027369	-0.883688	-0.883688	0.00274079	-322.42
Bangladeshi2	Direkli4	MarkaziBezoar3	64209	1026097	-0.882218	-0.882218	0.00270799	-325.784
Pakistani3	Direkli4	MarkaziBezoar3	64950	1026713	-0.881007	-0.881007	0.0027898	-315.796
Swiss2	Direkli4	MarkaziBezoar3	67767	1004119	-0.873556	-0.873556	0.002885	-302.792
IOG	Direkli4	MarkaziBezoar3	67226	1006118	-0.874735	-0.874735	0.00284977	-306.949
French6	Direkli4	MarkaziBezoar3	65847	1005399	-0.877065	-0.877065	0.00290965	-301.434
Dutch1	Direkli4	MarkaziBezoar3	64681	1005218	-0.879089	-0.879089	0.00282941	-310.697
Italian1	Direkli4	MarkaziBezoar3	66089	1005283	-0.876627	-0.876627	0.00283917	-308.762
French2	Direkli4	MarkaziBezoar3	66241	1006252	-0.876473	-0.876473	0.00290065	-302.164
AlborzBezoar3	Direkli4	MarkaziBezoar3	63757	1007659	-0.880985	-0.880985	0.00277332	-317.664
AlborzBezoar2	Direkli4	MarkaziBezoar3	64484	1010298	-0.880005	-0.880005	0.00287568	-306.017
ZagrosBezoar2	Direkli4	MarkaziBezoar3	63321	1021159	-0.883223	-0.883223	0.00269594	-327.613
ZagrosBezoar3	Direkli4	MarkaziBezoar3	62874	1021438	-0.88403	-0.88403	0.00270094	-327.304
AlborzBezoar4	Direkli4	MarkaziBezoar3	64308	1009598	-0.880235	-0.880235	0.00284048	-309.889
AzerbaijanBezoar1	Direkli4	MarkaziBezoar3	64557	1003312	-0.879092	-0.879092	0.00286428	-306.915
ZagrosBezoar4	Direkli4	MarkaziBezoar3	62161	1016102	-0.884702	-0.884702	0.00268861	-329.055
AzerbaijanBezoar5	Direkli4	MarkaziBezoar3	64208	1000186	-0.879353	-0.879353	0.0028192	-311.916
AzerbaijanBezoar6	Direkli4	MarkaziBezoar3	63600	1001875	-0.880617	-0.880617	0.00278388	-316.327
MarkaziBezoar1	Direkli4	MarkaziBezoar3	62368	1035831	-0.886418	-0.886418	0.00263471	-336.439
AzerbaijanBezoar10	Direkli4	MarkaziBezoar3	64759	1004391	-0.878859	-0.878859	0.00288434	-304.701
AlborzBezoar1	Direkli4	MarkaziBezoar3	64242	1006673	-0.880024	-0.880024	0.00283113	-310.839
AlborzBezoar5	Direkli4	MarkaziBezoar3	64429	1010620	-0.880138	-0.880138	0.00287784	-305.832
AlborzBezoar6	Direkli4	MarkaziBezoar3	64901	1006382	-0.878835	-0.878835	0.00282468	-311.128
MarkaziBezoar2	Direkli4	MarkaziBezoar3	63599	1039809	-0.884723	-0.884723	0.00269479	-328.308
Iranian11	Direkli4	MarkaziBezoar3	64375	1021248	-0.881405	-0.881405	0.00276046	-319.296
Iranian16	Direkli4	MarkaziBezoar3	64532	1022499	-0.881269	-0.881269	0.00277046	-318.095
Iranian18	Direkli4	MarkaziBezoar3	64018	1022348	-0.882143	-0.882143	0.00271055	-325.448
Iranian19	Direkli4	MarkaziBezoar3	63773	1022703	-0.882606	-0.882606	0.00275989	-319.798
Iranian4	Direkli4	MarkaziBezoar3	63899	1021092	-0.882213	-0.882213	0.00275101	-320.687
Iranian22	Direkli4	MarkaziBezoar3	64640	1021179	-0.880938	-0.880938	0.00278009	-316.873
Iranian21	Direkli4	MarkaziBezoar3	63007	1022805	-0.883945	-0.883945	0.00273239	-323.506
Abdul4	Direkli4	Iranian11	56405	870881	-0.878344	-0.878344	0.0028222	-311.226
Blagotin3	Direkli4	Iranian11	68547	1010644	-0.872966	-0.872966	0.00297509	-293.425
Direkli1-2	Direkli4	Iranian11	69778	997325	-0.86922	-0.86922	0.00309443	-280.898
Direkli5	Direkli4	Iranian11	13362	214811	-0.882878	-0.882878	0.00277695	-317.931
Direkli6	Direkli4	Iranian11	57233	871090	-0.876696	-0.876696	0.00290346	-301.949
Hovk1	Direkli4	Iranian11	61534	918853	-0.87447	-0.87447	0.00303488	-288.14
Semnan3	Direkli4	Iranian11	70118	1029346	-0.872451	-0.872451	0.00298308	-292.466
Moroccan8	Direkli4	Iranian11	64650	1044111	-0.883383	-0.883383	0.00277568	-318.259
Moroccan3	Direkli4	Iranian11	64583	1044404	-0.883528	-0.883528	0.00279144	-316.513
Tog	Direkli4	Iranian11	69726	1042648	-0.874636	-0.874636	0.00285464	-306.391
Ethiopian1	Direkli4	Iranian11	64570	1048481	-0.883977	-0.883977	0.00279002	-316.835
Sudanese6	Direkli4	Iranian11	65028	1046878	-0.883033	-0.883033	0.00262553	-336.326
Nigerian2	Direkli4	Iranian11	64423	1038751	-0.883204	-0.883204	0.00276017	-319.982
Aerbasi1	Direkli4	Iranian11	46949	793892	-0.888328	-0.888328	0.00269916	-329.113
Alashan3	Direkli4	Iranian11	58750	982115	-0.887113	-0.887113	0.00273544	-324.304
CHIR1	Direkli4	Iranian11	68842	1046449	-0.876549	-0.876549	0.00305775	-286.664
Bangladeshi7	Direkli4	Iranian11	65794	1044510	-0.881485	-0.881485	0.00281966	-312.621
Bangladeshi2	Direkli4	Iranian11	65799	1044279	-0.881452	-0.881452	0.00281665	-312.943
Pakistani3	Direkli4	Iranian11	66460	1049407	-0.880882	-0.880882	0.0028497	-309.114
Swiss2	Direkli4	Iranian11	68517	1026048	-0.874805	-0.874805	0.00292648	-298.927
IOG	Direkli4	Iranian11	67913	1028151	-0.876078	-0.876078	0.00287874	-304.327
French6	Direkli4	Iranian11	66026	1030582	-0.879581	-0.879581	0.00285827	-307.732
Dutch1	Direkli4	Iranian11	65383	1027415	-0.880338	-0.880338	0.00284601	-309.324
Italian1	Direkli4	Iranian11	66714	1027831	-0.878097	-0.878097	0.00283648	-309.573
French2	Direkli4	Iranian11	66747	1029935	-0.878275	-0.878275	0.00284883	-308.293
AlborzBezoar3	Direkli4	Iranian11	67647	1008022	-0.874223	-0.874223	0.00295656	-295.689
AlborzBezoar2	Direkli4	Iranian11	68767	1009559	-0.872456	-0.872456	0.00304091	-286.907
ZagrosBezoar2	Direkli4	Iranian11	68392	1015365	-0.873787	-0.873787	0.0029985	-291.409
ZagrosBezoar3	Direkli4	Iranian11	67710	1016549	-0.875104	-0.875104	0.00293727	-297.931
AlborzBezoar4	Direkli4	Iranian11	68103	1011618	-0.873851	-0.873851	0.0030261	-288.771
AzerbaijanBezoar1	Direkli4	Iranian11	67709	1009522	-0.874291	-0.874291	0.00298363	-293.029
ZagrosBezoar4	Direkli4	Iranian11	66605	1011082	-0.876393	-0.876393	0.00290343	-301.848
AzerbaijanBezoar5	Direkli4	Iranian11	67148	1006563	-0.874923	-0.874923	0.00294432	-297.156
AzerbaijanBezoar6	Direkli4	Iranian11	67181	1007814	-0.875012	-0.875012	0.00300034	-291.637
MarkaziBezoar1	Direkli4	Iranian11	68705	1020316	-0.873822	-0.873822	0.00300694	-290.602
AzerbaijanBezoar10	Direkli4	Iranian11	68387	1009639	-0.873125	-0.873125	0.00305303	-285.986
AlborzBezoar1	Direkli4	Iranian11	68376	1006952	-0.872828	-0.872828	0.00305796	-285.428
AlborzBezoar5	Direkli4	Iranian11	68354	1011611	-0.873414	-0.873414	0.0029893	-292.18
AlborzBezoar6	Direkli4	Iranian11	68755	1007533	-0.872237	-0.872237	0.00298131	-292.568
MarkaziBezoar2	Direkli4	Iranian11	70777	1021451	-0.870399	-0.870399	0.00306848	-283.658
MarkaziBezoar3	Direkli4	Iranian11	69217	1021248	-0.87305	-0.87305	0.00294198	-296.756
Iranian16	Direkli4	Iranian11	64174	1054429	-0.885261	-0.885261	0.0027838	-318.005
Iranian18	Direkli4	Iranian11	63936	1054032	-0.885621	-0.885621	0.00274731	-322.359
Iranian19	Direkli4	Iranian11	63869	1054146	-0.885746	-0.885746	0.00276684	-320.13
Iranian4	Direkli4	Iranian11	63645	1053396	-0.886047	-0.886047	0.00273025	-324.53
Iranian22	Direkli4	Iranian11	64315	1052539	-0.884828	-0.884828	0.00272248	-325.008
Iranian21	Direkli4	Iranian11	63666	1048878	-0.885549	-0.885549	0.00277102	-319.575
Abdul4	Direkli4	Iranian16	56285	870831	-0.87858	-0.87858	0.00267724	-328.166
Blagotin3	Direkli4	Iranian16	68027	1012473	-0.874082	-0.874082	0.00282738	-309.149
Direkli1-2	Direkli4	Iranian16	69389	998673	-0.870066	-0.870066	0.00292868	-297.084
Direkli5	Direkli4	Iranian16	13368	215234	-0.883046	-0.883046	0.00276986	-318.805
Direkli6	Direkli4	Iranian16	56746	871897	-0.877787	-0.877787	0.00276204	-317.804
Hovk1	Direkli4	Iranian16	61084	918759	-0.875319	-0.875319	0.00291136	-300.657
Semnan3	Direkli4	Iranian16	69455	1029453	-0.873593	-0.873593	0.00280953	-310.939
Moroccan8	Direkli4	Iranian16	63605	1046865	-0.885445	-0.885445	0.00261325	-338.83
Moroccan3	Direkli4	Iranian16	63346	1048273	-0.886029	-0.886029	0.00257021	-344.731
Tog	Direkli4	Iranian16	68491	1047279	-0.877231	-0.877231	0.00268705	-326.466
Ethiopian1	Direkli4	Iranian16	63017	1050732	-0.886838	-0.886838	0.00257127	-344.903
Sudanese6	Direkli4	Iranian16	64221	1048815	-0.884602	-0.884602	0.00242187	-365.256
Nigerian2	Direkli4	Iranian16	63578	1041860	-0.884972	-0.884972	0.00260698	-339.462
Aerbasi1	Direkli4	Iranian16	46198	795213	-0.890189	-0.890189	0.00246113	-361.699
Alashan3	Direkli4	Iranian16	57912	984564	-0.888895	-0.888895	0.00249353	-356.48
CHIR1	Direkli4	Iranian16	68176	1049557	-0.87801	-0.87801	0.00286596	-306.358
Bangladeshi7	Direkli4	Iranian16	64856	1046352	-0.883269	-0.883269	0.00264441	-334.014
Bangladeshi2	Direkli4	Iranian16	65007	1046800	-0.883061	-0.883061	0.00261297	-337.952
Pakistani3	Direkli4	Iranian16	65384	1051497	-0.882917	-0.882917	0.00266712	-331.037
Swiss2	Direkli4	Iranian16	67649	1028488	-0.876568	-0.876568	0.00271929	-322.352
IOG	Direkli4	Iranian16	67180	1030493	-0.877596	-0.877596	0.00266643	-329.127
French6	Direkli4	Iranian16	65565	1031888	-0.880514	-0.880514	0.0026822	-328.281
Dutch1	Direkli4	Iranian16	64685	1029343	-0.881749	-0.881749	0.0026923	-327.507
Italian1	Direkli4	Iranian16	65848	1029732	-0.879793	-0.879793	0.00267405	-329.011
[truncated: 258 more rows]

## Sheet: 1C
Published samples used in the present study.
ENA Accession	Analysis Name	Population	% error (perfect genome approach, for Direkli samples and Tur1)	ARS1 Coverage	IBS	Sheep aligned
SAMN06233877	C.sibirica01	Siberian ibex	NA	81.55	Y	Y
SAMN07156565	C.ibex	Alpine ibex	NA	10.46	Y	Y
SAMN07156563	C.sibirica02	Siberian ibex	NA	9.63	Y	Y
SAMN07156564	C.sibirica03	Siberian ibex	NA	12.1	Y	Y
SAMN07156560	C.falconeri01	Markhor	NA	8.74	Y	Y
SAMN07156561	C.falconeri02	Markhor	NA	27.23	Y	Y
SAMN07156562	C.falconeri03	Markhor	NA	10.23	Y	Y
SAMN10736157	C.falconeri04	Markhor	NA	47.31	Y	N
SAMN10736129	C.Ibex05	Alpine ibex	NA	20.93	Y	N
SAMN10736159	C.sibirica05	Nubian ibex	NA	24.57	Y	N
SAMN10736154	C.pyrenaica04	Iberian ibex	NA	18.91	Y	N
SAMN10736158	C.sibirica04	Nubian ibex	NA	17.57	Y	N
SAMN10736151	C.pyrenaica03	Iberian ibex	NA	13.96	Y	N
SAMN10736152	C.pyrenaica02	Iberian ibex	NA	17.08	Y	N
SAMN10736156	C.nubiana02	Nubian ibex	NA	20.8	Y	N
SAMN10736153	C.pyrenaica01	Iberian ibex	NA	30.13	Y	N
SAMN10736155	C.nubiana01	Nubian ibex	NA	19.37	Y	N
SAMN10736131	C.Ibex04	Alpine ibex	NA	19.31	Y	N
SAMN10736135	C.Ibex03	Alpine ibex	NA	18.53	Y	N
SAMN10736148	C.Ibex02	Alpine ibex	NA	21.68	Y	N
SAMEA2065220	AzerbaijanBezoar1	Azerbaijan bezoar	NA	12.56	Y	N
SAMEA2188056	AzerbaijanBezoar10	Azerbaijan bezoar	NA	12.86	Y	N
SAMEA2065224	AlborzBezoar7	Alborz bezoar	NA	12.36	N	N
SAMEA2065212	AzerbaijanBezoar3	Azerbaijan bezoar	NA	12.61	N	Y
SAMEA2065216	AzerbaijanBezoar4	Azerbaijan bezoar	NA	6.89	N	N
SAMEA2065217	AzerbaijanBezoar5	Azerbaijan bezoar	NA	6.76	N	N
SAMEA2065214	AzerbaijanBezoar6	Azerbaijan bezoar	NA	7.65	N	N
SAMEA2065213	AzerbaijanBezoar7	Azerbaijan bezoar	NA	11.65	N	N
SAMEA2065215	AzerbaijanBezoar8	Azerbaijan bezoar	NA	12.3	N	N
SAMEA2065218	AzerbaijanBezoar9	Azerbaijan bezoar	NA	13.13	N	N
SAMEA2065222	ZagrosBezoar1	Zagros bezoar	NA	5.72	N	N
SAMEA2065221	ZagrosBezoar2	Zagros bezoar	NA	6.62	Y	N
SAMEA2065225	ZagrosBezoar3	Zagros bezoar	NA	6.91	Y	N
SAMEA2065223	ZagrosBezoar4	Zagros bezoar	NA	5.38	N	N
SAMN07156477	MarkaziBezoar3	Markazi bezoar	NA	11.9	Y	Y
SAMN03071857	MarkaziBezoar2	Markazi bezoar	NA	19.58	Y	N
SAMEA2065227	MarkaziBezoar1	Markazi bezoar	NA	10.96	N	Y
SAMEA2395407	AlborzBezoar1	Alborz bezoar	NA	15.09	Y	Y
SAMEA1966535	AlborzBezoar2	Alborz bezoar	NA	12.95	N	N
SAMEA2065421	AlborzBezoar3	Alborz bezoar	NA	6.82	Y	N
SAMEA2065226	AlborzBezoar4	Alborz bezoar	NA	11.86	Y	N
SAMEA2395406	AlborzBezoar5	Alborz bezoar	NA	14.88	N	Y
SAMEA2395408	AlborzBezoar6	Alborz bezoar	NA	14.74	N	N
SAMEA2012964	Moroccan1	Moroccan domestic	NA	12.94	N	N
SAMEA2012707	Moroccan2	Moroccan domestic	NA	14.12	N	N
SAMEA2012705	Moroccan3	Moroccan domestic	NA	13.82	N	N
SAMEA2012826	Moroccan4	Moroccan domestic	NA	15.29	N	N
SAMEA2012908	Moroccan5	Moroccan domestic	NA	12.54	N	N
SAMEA2013048	Moroccan6	Moroccan domestic	NA	14.97	N	N
SAMEA2013062	Moroccan7	Moroccan domestic	NA	15.74	N	N
SAMEA2012822	Moroccan8	Moroccan domestic	NA	13.42	N	N
SAMEA2012903	Moroccan9	Moroccan domestic	NA	13.18	Y	N
SAMEA2037792	Moroccan18	Moroccan domestic	NA	10.77	N	N
SAMEA4609296	Tog	Togolese domestic	NA	38.7	Y	Y
SAMN07156478	Ethiopian1	Ethiopian domestic	NA	11.16	N	N
SAMN07156479	Ethiopian2	Ethiopian domestic	NA	9.68	N	N
SAMN07156480	Nigerian1	Nigerian domestic	NA	8.05	N	Y
SAMN07156481	Nigerian2	Nigerian domestic	NA	11.14	N	N
SAMN10995949	Sudanese1	Sudanese domestic	NA	9.57	N	N
SAMN10995951	Sudanese2	Sudanese domestic	NA	10.35	N	N
SAMN10995952	Sudanese3	Sudanese domestic	NA	8.96	N	N
SAMN10995950	Sudanese4	Sudanese domestic	NA	9.73	N	N
SAMN10995953	Sudanese5	Sudanese domestic	NA	9.75	N	N
SAMN10995954	Sudanese6	Sudanese domestic	NA	9.47	N	N
SAMN10391846	Bangladeshi1	Bangladeshi domestic	NA	37.89	N	N
SAMN10460900	Bangladeshi2	Bangladeshi domestic	NA	10.55	N	N
SAMN10460904	Bangladeshi3	Bangladeshi domestic	NA	10.65	N	N
SAMN10460883	Bangladeshi4	Bangladeshi domestic	NA	10.89	N	N
SAMN10460890	Bangladeshi5	Bangladeshi domestic	NA	10.92	Y	N
SAMN07156543	Bangladeshi6	Bangladeshi domestic	NA	9.39	N	N
SAMN07156544	Bangladeshi7	Bangladeshi domestic	NA	9.2	N	N
SAMN07156545	Bangladeshi8	Bangladeshi domestic	NA	9.91	N	N
SAMN07156546	Pakistani1	Pakistani domestic	NA	13.62	N	N
SAMN07156547	Pakistani2	Pakistani domestic	NA	11.74	N	N
SAMN07156548	Pakistani3	Pakistani domestic	NA	13.27	N	N
SAMN07156549	Pakistani4	Pakistani domestic	NA	12.54	N	N
SAMN07156550	Pakistani5	Pakistani domestic	NA	12.59	N	N
SAMN02953816	CHIR1	Chinese domestic	NA	36.65	N	Y
SAMN05592064	Alashan1	Chinese domestic	NA	6.38	N	N
SAMN05592070	Alashan2	Chinese domestic	NA	1.77	N	N
SAMN05592075	Alashan3	Chinese domestic	NA	3.34	N	N
SAMN05592080	Alashan4	Chinese domestic	NA	1.79	N	N
SAMN05592082	Alashan5	Chinese domestic	NA	6.24	N	N
SAMN05592082	Liaoning1	Chinese domestic	NA	4.46	N	N
SAMN05601117	Liaoning2	Chinese domestic	NA	2.03	N	N
SAMN05601123	Liaoning3	Chinese domestic	NA	1.85	N	N
SAMN05601126	Liaoning4	Chinese domestic	NA	3.98	N	N
SAMN05601128	Liaoning5	Chinese domestic	NA	1.15	N	N
SAMN05601591	Aerbasi1	Chinese domestic	NA	1.64	Y	N
SAMN05601592	Aerbasi2	Chinese domestic	NA	4.55	N	N
SAMN05601602	Aerbasi3	Chinese domestic	NA	1.42	N	N
SAMN05601605	Aerbasi4	Chinese domestic	NA	6.56	N	N
SAMN05601608	Aerbasi5	Chinese domestic	NA	0.28	N	N
SAMN05601625	Aerbasi6	Chinese domestic	NA	2.3	N	N
SAMN05601632	Erlangshan1	Chinese domestic	NA	1.65	N	N
SAMN05601633	Erlangshan2	Chinese domestic	NA	4.8	N	N
SAMN05601636	Erlangshan3	Chinese domestic	NA	3.55	N	N
SAMN05601638	Erlangshan4	Chinese domestic	NA	1.41	N	N
SAMN07156559	Chinese1	Chinese domestic	NA	10.34	N	N
SAMN07156552	Chinese2	Chinese domestic	NA	12.01	N	N
SAMN07156554	Chinese3	Chinese domestic	NA	11.32	N	N
SAMN07156514	Chinese4	Chinese domestic	NA	19.18	N	N
SAMN07156515	Chinese5	Chinese domestic	NA	26.31	N	N
SAMN07156519	Chinese6	Chinese domestic	NA	18.17	N	N
SAMN07156492	Chinese7	Chinese domestic	NA	11.72	N	N
SAMN07156494	Chinese8	Chinese domestic	NA	9.43	N	N
SAMN07156500	Chinese9	Chinese domestic	NA	10.5	N	N
SAMEA2417033	French2	Europe domestic	NA	13.63	N	N
SAMEA2417034	French3	Europe domestic	NA	13.34	N	N
SAMEA2417035	French1	Europe domestic	NA	14.41	N	N
SAMEA2417036	French4	Europe domestic	NA	14.06	N	N
SAMN07156522	French5	Europe domestic	NA	11.3	N	N
SAMN07156523	French6	Europe domestic	NA	14.6	N	N
SAMEA2297390	Italian1	Europe domestic	NA	15.37	N	N
SAMEA2297391	Italian2	Europe domestic	NA	15.21	N	N
SAMEA2297392	Italian4	Europe domestic	NA	14.37	N	N
SAMEA2297393	Italian3	Europe domestic	NA	14.91	Y	Y
SAMEA2297394	Italian5	Europe domestic	NA	14.19	N	N
SAMEA4609295	IOG	Europe domestic	NA	42.75	N	Y
SAMN07156520	Spanish1	Spanish (Canary) domestic	NA	13.61	N	N
SAMN07156521	Spanish2	Spanish (Canary) domestic	NA	10.43	N	N
SAMN07156524	Dutch1	Europe domestic	NA	13.27	N	Y
SAMN07156525	Dutch2	Europe domestic	NA	13.95	N	N
SAMN07156526	Dutch3	Europe domestic	NA	11.19	Y	N
SAMN04453658	Swiss1	Europe domestic	NA	16.04	N	N
SAMN04453659	Swiss2	Europe domestic	NA	11.16	N	N
SAMEA2065423	Iranian1	Iranian domestic	NA	13.82	N	N
SAMEA2065431	Iranian2	Iranian domestic	NA	11.97	N	N
SAMEA2065424	Iranian3	Iranian domestic	NA	13.15	N	N
SAMEA2065422	Iranian4	Iranian domestic	NA	13.37	N	N
SAMEA2065426	Iranian5	Iranian domestic	NA	11.85	N	N
SAMEA1968884	Iranian6	Iranian domestic	NA	12.98	N	N
SAMEA2065433	Iranian7	Iranian domestic	NA	13.35	N	N
SAMEA2065438	Iranian8	Iranian domestic	NA	11.47	N	N
SAMEA2065437	Iranian9	Iranian domestic	NA	11.49	N	N
SAMEA2065436	Iranian10	Iranian domestic	NA	12.92	N	N
SAMEA2065435	Iranian11	Iranian domestic	NA	13.15	N	N
SAMEA2065587	Iranian12	Iranian domestic	NA	12.46	N	N
SAMEA2065428	Iranian13	Iranian domestic	NA	13.15	N	N
SAMEA2065432	Iranian14	Iranian domestic	NA	12.46	N	N
SAMEA2065425	Iranian15	Iranian domestic	NA	12.27	N	N
SAMEA2065429	Iranian16	Iranian domestic	NA	13.97	N	N
SAMEA2065430	Iranian17	Iranian domestic	NA	12.72	N	N
SAMEA2065434	Iranian18	Iranian domestic	NA	12.85	N	N
SAMEA2065427	Iranian19	Iranian domestic	NA	13.58	N	N
SAMEA1966659	Iranian20	Iranian domestic	NA	13.21	N	N
SAMN07156527	Iranian21	Iranian domestic	NA	12.99	N	Y
SAMN07156531	Iranian22	Iranian domestic	NA	11.87	N	N
SAMN07156534	Iranian23	Iranian domestic	NA	16.13	Y	N
SAMN10995957	Tur1	West Cacuasian Tur	0.0742	2.81	N	N
SAMEA4453842	Direkli1-2	Direkli Cave bezoar (Epipaleolithic Taurus)	0.0521	11.21	N	Y
SAMEA4588078	Direkli5	Direkli Cave bezoar (Epipaleolithic Taurus)	0.0465	0.26	N	N
SAMEA4591773	Direkli6	Direkli Cave bezoar (Epipaleolithic Taurus)	0.0363	2.5	N	N
SAMEA4450095	Acem1	Bronze Age Turkey	NA	4.35	N	N
SAMEA7368742	Abdul4	PPN Zagros Outlier	NA	2.31	N	Y
SAMEA4591761	Acem2	Bronze Age Turkey	NA	8.63	N	N
SAMEA4591766	Azer3-5	Bronze Age Caucasus region	NA	4.54	N	N
SAMEA4591767	Azer4	Iron Age/Medieval Caucasus region	NA	2.56	N	N
SAMEA4589056	Blagotin16	Neolithic Serbia	NA	3.48	N	N
SAMEA4588077	Blagotin3	Neolithic Serbia	NA	11.4	N	Y
SAMEA4588076	Blagotin1	Neolithic Serbia	NA	6.93	N	Y
SAMEA4589055	Blagotin2	Neolithic Serbia	NA	3.9	N	Y
SAMEA4609146	Geor2	Iron Age/Medieval Caucasus region	NA	1.5	N	N
SAMEA4591768	Qazvin1	Bronze Age Iran	NA	3.13	N	N
SAMEA4591755	Semnan10	Neolithic East Iran / Turkmenistan	NA	1.42	N	N
SAMEA4607423	Semnan13	Neolithic East Iran / Turkmenistan	NA	2.83	N	N
SAMEA4591756, SAMEA4591757	Semnan1-2	Neolithic East Iran / Turkmenistan	NA	6.61	N	Y
SAMEA4591758	Semnan3	Neolithic East Iran / Turkmenistan	NA	14.44	N	Y
SAMEA4607414	Bulak1	Bronze Age Uzbekistan	NA	0.85	N	N
SAMEA4607415	Bulak2	Bronze Age Uzbekistan	NA	2.66	N	N
SAMEA4591769	Fars4	Chalcolithic Iran	NA	1.01	N	N
SAMEA4591772	Potterne1	Iron Age Britain	NA	3.57	N	Y
SAMEA4591760	Semnan9	Neolithic East Iran / Turkmenistan	NA	3.04	N	Y
SAMEA4591770	Kazbegi1	Iron Age/Medieval Caucasus region	NA	3.74	N	N
SAMEA4607419	Monjukli8	Neolithic East Iran / Turkmenistan	NA	2.55	N	N
SAMEA4589054	Semnan7	Neolithic East Iran / Turkmenistan	NA	3.26	N	N
SAMEA4607426	Darre2	Iron Age/Medival Iran	NA	3.83	N	N
SAMEA4591774	Lur12	PPN Tepe Abdul Hosein	NA	1.01	N	Y
SAMEA7368734	Ganjdareh3	PPN Ganj Dareh	NA	2.17	N	Y
SAMEA7368719	Ganjdareh18	PPN Ganj Dareh	NA	2.48	N	N
SAMEA7368724	Ganjdareh22	PPN Ganj Dareh	NA	2.55	N	Y
SAMEA7368722	Ganjdareh20	PPN Ganj Dareh	NA	2.81	N	N
SAMEA7368727	Ganjdareh26	PPN Ganj Dareh	NA	1.2	N	N
SAMEA7368732	Ganjdareh34	PPN Ganj Dareh	NA	1.49	N	N
SAMN02720826	Sheep	Sheep (single genome outgroup)	NA	29.63	N	Y
SAMN14590209	Sheep2	Sheep (population outgroup)	NA	18.78	N	Y
SAMN14590219	Sheep3	Sheep (population outgroup)	NA	23.77	N	Y
SAMN14590235	Sheep4	Sheep (population outgroup)	NA	22.73	N	Y
SAMN14590398	Sheep5	Sheep (population outgroup)	NA	22.29	N	Y
SAMN14590387	Sheep6	Sheep (population outgroup)	NA	26.76	N	Y
SAMN14590391	Sheep7	Sheep (population outgroup)	NA	24.29	N	Y
SAMN14590285	Sheep8	Sheep (population outgroup)	NA	22.2	N	Y
SAMN14590275	Sheep9	Sheep (population outgroup)	NA	22.9	N	Y
SAMN14590259	Sheep10	Sheep (population outgroup)	NA	22.98	N	Y
SAMN14590340	Sheep11	Sheep (population outgroup)	NA	23.19	N	Y
RUCC-CAU-0047	SAMEA6675500	West Cacuasian Tur	NA	11.98	Y	Y
FRCC-CAU-4078	SAMEA6675490	West Cacuasian Tur	NA	9.81	Y	Y
AZCC-CYL-0011	SAMEA6675489	East Caucasian Tur	NA	10.96	Y	Y

## Sheet: 1D
Sample sequencing statistics.
Sample	Sequencing Approach	Raw reads	Collapsed/Trimmed reads	q30 duplicates	q30 dups %age	mtDNA q30 dups	mtDNA q30 dups %age
Direkli9	Shotgun - NovaSeq 6000 - PE	2690886	2236172	18007	0.669185	33	0.00122636
Direkli9	Capture - MiSeq - SE	197541	189945	1976	1.0003	3129	1.58397
Direkli12	Shotgun - NovaSeq 6000 - PE	2888427	2426117	3788458	131.16	13810	0.478115
Direkli13	Shotgun - NovaSeq 6000 - PE	5437824	4566965	329756	6.06412	1726	0.0317406
Direkli13	Capture - MiSeq - SE	123170	118566	7295	5.92271	22815	18.5232
Direkli14	Shotgun - NovaSeq 6000 - PE	10082998	8422634	28423	0.28189	105	0.00104136
Direkli14	Capture - MiSeq - SE	1607403	1513717	6660	0.414333	4120	0.256314
Direkli15	Shotgun - NovaSeq 6000 - PE	1261702	1024281	9851	0.780771	64	0.00507251
Direkli15	Capture - MiSeq - SE	306814	299127	3311	1.07916	8181	2.66644
Direkli16	Shotgun - NovaSeq 6000 - PE	17167022	11819076	278115	1.62005	314	0.00182909
Direkli16	Capture - MiSeq - SE	155340	149425	3459	2.22673	4751	3.05845
Direkli17	Shotgun - NovaSeq 6000 - PE	2143886	1900653	8075	0.376652	30	0.00139933
Direkli4	Shotgun - HiSeq 2000 - SE	287757158	249250733	28042936	9.74535	42129	0.0146405
Direkli4	Shotgun - HiSeq 2000 - SE	213614388	187947946	50968609	23.8601	65507	0.030666
Direkli4	Shotgun - HiSeq 2000 - SE	298276071	274614699	54373727	18.2293	76957	0.0258006
Caucasus1	Shotgun - HiSeq 2000 - SE	37488436	37151798	18461811	49.2467	12550	0.033477
Falconeri1	Shotgun - HiSeq 2000 - SE	155856295	155075023	13789737	8.84773	14523	0.0093182
Falconeri2	Shotgun - HiSeq 2000 - SE	26596844	26285911	1265997	4.75995	8722	0.0327934
Ibex1	Shotgun - HiSeq 2000 - SE	198773459	198009141	117372244	59.0482	34508	0.0173605
Ibex2	Shotgun - HiSeq 2000 - SE	12051498	11894653	2193867	18.2041	4658	0.0386508
Nubiana1	Shotgun - HiSeq 2000 - SE	387640633	378879074	35198757	9.08025	41357	0.0106689
pyrenaica2	Shotgun - HiSeq 2000 - SE	61022761	60771313	4402800	7.21501	10802	0.0177016
Sibirica2	Shotgun - HiSeq 2000 - SE	108322885	108044862	40511330	37.3987	37838	0.0349308
Walie1	Shotgun - HiSeq 2000 - SE	108924350	108603920	17606049	16.1636	20314	0.0186496
Tur2	Shotgun - HiSeq 2000 - SE	7288450	7246195	657728	9.02425	1023	0.0140359
Caucasus2	Capture - MiSeq - SE	4273753	4172419	106331	2.488	104027	2.43409
Caucasus3	Capture - MiSeq - SE	3007832	2963763	202718	6.73967	127308	4.23255

## Sheet: 1E
Direkli1-2 (bezoar)-Direkli4 (tur-like) relative affinity measured using D(Direkli1-2, Direkli4; X, Sheep).
H1	H2	H3	nABBA	nBABA	Dstat	jackEst	SE	Z
Direkli1-2	Direkli4	AlborzBezoar3	68808	1014198	-0.872931	-0.872931	0.00307836	-283.571
Direkli1-2	Direkli4	AlborzBezoar2	70153	1019152	-0.871197	-0.871197	0.00305486	-285.184
Direkli1-2	Direkli4	ZagrosBezoar2	66506	999119	-0.875179	-0.875179	0.00298938	-292.763
Direkli1-2	Direkli4	ZagrosBezoar3	66683	999834	-0.874952	-0.874952	0.00303054	-288.711
Direkli1-2	Direkli4	AlborzBezoar4	69669	1020083	-0.872138	-0.872138	0.00309775	-281.539
Direkli1-2	Direkli4	AzerbaijanBezoar1	70340	1032998	-0.872496	-0.872496	0.00310523	-280.976
Direkli1-2	Direkli4	ZagrosBezoar4	66059	994634	-0.875442	-0.875442	0.00302783	-289.131
Direkli1-2	Direkli4	AzerbaijanBezoar5	69483	1028582	-0.873445	-0.873445	0.0030617	-285.281
Direkli1-2	Direkli4	AzerbaijanBezoar6	69551	1029968	-0.873488	-0.873488	0.00307559	-284.007
Direkli1-2	Direkli4	MarkaziBezoar1	66773	993586	-0.874056	-0.874056	0.00293894	-297.405
Direkli1-2	Direkli4	AzerbaijanBezoar10	70585	1032666	-0.872042	-0.872042	0.00309812	-281.474
Direkli1-2	Direkli4	AlborzBezoar1	69242	1013729	-0.872126	-0.872126	0.0030377	-287.101
Direkli1-2	Direkli4	AlborzBezoar5	69875	1019424	-0.871707	-0.871707	0.00315092	-276.651
Direkli1-2	Direkli4	AlborzBezoar6	69292	1015286	-0.872223	-0.872223	0.00308181	-283.023
Direkli1-2	Direkli4	MarkaziBezoar2	66267	982847	-0.873671	-0.873671	0.00288413	-302.923
Direkli1-2	Direkli4	MarkaziBezoar3	66952	988370	-0.873116	-0.873116	0.00298616	-292.387
Direkli1-2	Direkli4	Tur1	981724	74872	0.858277	0.858277	0.00271057	316.641
Direkli1-2	Direkli4	Direkli12	4802	74169	-0.878386	-0.878386	0.00345725	-254.071
Direkli1-2	Direkli4	Direkli13	495	7227	-0.871795	-0.871795	0.00607959	-143.397
Direkli1-2	Direkli4	Direkli14	58	649	-0.835926	-0.835926	0.0221294	-37.7744
Direkli1-2	Direkli4	Direkli15	16	226	-0.867769	-0.867769	0.0334299	-25.9579
Direkli1-2	Direkli4	Direkli16	5873	432	0.862966	0.862966	0.00678885	127.115
Direkli1-2	Direkli4	Direkli17	137	18	0.767742	0.767742	0.0518255	14.814
Direkli1-2	Direkli4	Direkli9	23	385	-0.887255	-0.887255	0.0244833	-36.2392

## Sheet: 1F
Published mtDNA sequences included in ML phylogeny.
Sequence name	Accession
A1_goat_01	NC_0206231
Alpine_Ibex	NC_0206231
B1_goat_78	KR0592201
B_bezoar_75	KR0592191
Bezoar_Ref	NC_0281611
C1a_goat_81	KR0592231
C1_bezoar_80	KR0592221
C_bezoar_79	KR0592211
D1_goat_67	KR0592111
D_bezoar_66	KR0592101
F_bezoar_84	KR0592261
Goat_Ref	NC_0050442
Markhor	NC_0206221
Nubian_Ibex	NC_0206241
Sheep	NC_0019411
Siberian_Ibex	NC_0206261
West_Caucasian_Tur	NC_0206831

## Sheet: 1G
Direkli4-Abdul4 relative affinity measured using D(X, Abdul4; Direkli4, Sheep).
H1	H2	H3	nABBA	nBABA	Dstat	jackEst	SE	Z	nABBA_sheep-aligned	nBABA_sheep-aligned	Dstat_sheep-aligned	jackEst_sheep-aligned	SE_sheep-aligned	Z_sheep-aligned
Abdul1	Abdul4	Direkli4	8554	8405	0.0087859	0.0087859	0.0086823	1.01193	NA	NA	NA	NA	NA	NA
Abdul2	Abdul4	Direkli4	12163	11466	0.0294977	0.0294977	0.00712693	4.1389	NA	NA	NA	NA	NA	NA
Abdul6	Abdul4	Direkli4	4223	3916	0.0377196	0.0377196	0.0116187	3.24647	NA	NA	NA	NA	NA	NA
Acem1	Abdul4	Direkli4	58192	57420	0.00667751	0.00667751	0.00462421	1.44403	NA	NA	NA	NA	NA	NA
Acem2	Abdul4	Direkli4	59433	59532	-0.000832177	-0.000832177	0.00464941	-0.178985	NA	NA	NA	NA	NA	NA
Ainghazal1	Abdul4	Direkli4	1915	2037	-0.0308705	-0.0308705	0.0162395	-1.90095	NA	NA	NA	NA	NA	NA
Ainghazal2	Abdul4	Direkli4	6157	3894	0.225152	0.225152	0.0111836	20.1323	NA	NA	NA	NA	NA	NA
Ainghazal3	Abdul4	Direkli4	191	214	-0.0567901	-0.0567901	0.0517424	-1.09756	NA	NA	NA	NA	NA	NA
Ainghazal4	Abdul4	Direkli4	479	459	0.021322	0.021322	0.0342467	0.622599	NA	NA	NA	NA	NA	NA
AP45	Abdul4	Direkli4	913	943	-0.0161638	-0.0161638	0.0241557	-0.669149	NA	NA	NA	NA	NA	NA
AP49	Abdul4	Direkli4	1066	1058	0.00376648	0.00376648	0.0224906	0.167469	NA	NA	NA	NA	NA	NA
Azer3-5	Abdul4	Direkli4	56830	55738	0.0097008	0.0097008	0.00447523	2.16767	NA	NA	NA	NA	NA	NA
Azer4	Abdul4	Direkli4	51518	51511	6.7942e-05	6.7942e-05	0.00476448	0.0142601	NA	NA	NA	NA	NA	NA
Azer6	Abdul4	Direkli4	12631	12315	0.0126674	0.0126674	0.00743207	1.70442	NA	NA	NA	NA	NA	NA
Blagotin16	Abdul4	Direkli4	53587	57822	-0.0380131	-0.0380131	0.00519979	-7.31051	NA	NA	NA	NA	NA	NA
Blagotin1	Abdul4	Direkli4	59635	62965	-0.0271615	-0.0271615	0.00490178	-5.54115	29592	33826	-0.0667634	-0.0667634	0.00538218	-12.4045
Blagotin2	Abdul4	Direkli4	56549	59828	-0.0281757	-0.0281757	0.00507919	-5.54728	28094	30956	-0.0484674	-0.0484674	0.00539317	-8.98681
Blagotin3	Abdul4	Direkli4	61048	64845	-0.0301605	-0.0301605	0.00489993	-6.1553	28505	33746	-0.0841914	-0.0841914	0.00528916	-15.9177
Bulak1	Abdul4	Direkli4	31184	29479	0.0281061	0.0281061	0.00535026	5.25322	NA	NA	NA	NA	NA	NA
Bulak2	Abdul4	Direkli4	49354	48823	0.0054086	0.0054086	0.00472436	1.14483	NA	NA	NA	NA	NA	NA
Bulak5	Abdul4	Direkli4	12483	12175	0.0124909	0.0124909	0.00707817	1.7647	NA	NA	NA	NA	NA	NA
Caucasus1	Abdul4	Direkli4	29718	265733	-0.79883	-0.79883	0.00467207	-170.98	NA	NA	NA	NA	NA	NA
Chalow1	Abdul4	Direkli4	2491	2353	0.0284888	0.0284888	0.0149096	1.91077	NA	NA	NA	NA	NA	NA
Darre1	Abdul4	Direkli4	2180	2011	0.0403245	0.0403245	0.0158904	2.53766	NA	NA	NA	NA	NA	NA
Darre2	Abdul4	Direkli4	54969	54537	0.00394499	0.00394499	0.00466384	0.845867	NA	NA	NA	NA	NA	NA
Direkli1-2	Abdul4	Direkli4	59530	68264	-0.0683444	-0.0683444	0.00499238	-13.6897	29750	36477	-0.101575	-0.101575	0.00518457	-19.5918
Direkli5	Abdul4	Direkli4	11708	14072	-0.091699	-0.091699	0.00780158	-11.7539	5739	6611	-0.0706073	-0.0706073	0.00984984	-7.16837
Direkli6	Abdul4	Direkli4	50288	59593	-0.0846825	-0.0846825	0.00548324	-15.4439	24113	29706	-0.103922	-0.103922	0.00587051	-17.7025
Fars1	Abdul4	Direkli4	1109	1034	0.0349977	0.0349977	0.021834	1.60289	NA	NA	NA	NA	NA	NA
Fars2-5	Abdul4	Direkli4	1867	1646	0.0629092	0.0629092	0.01669	3.76928	NA	NA	NA	NA	NA	NA
Fars4	Abdul4	Direkli4	36594	34578	0.0283258	0.0283258	0.00506505	5.5924	NA	NA	NA	NA	NA	NA
Ganjdareh18	Abdul4	Direkli4	50828	48356	0.0249234	0.0249234	0.00462195	5.3924	NA	NA	NA	NA	NA	NA
Ganjdareh20	Abdul4	Direkli4	53904	50285	0.034735	0.034735	0.00438403	7.92305	NA	NA	NA	NA	NA	NA
Ganjdareh22	Abdul4	Direkli4	54346	50232	0.0393391	0.0393391	0.00474833	8.28483	24852	24247	0.012322	0.012322	0.00562285	2.19142
Ganjdareh24	Abdul4	Direkli4	5300	5056	0.0235612	0.0235612	0.010587	2.22548	NA	NA	NA	NA	NA	NA
Ganjdareh26	Abdul4	Direkli4	39123	36529	0.0342886	0.0342886	0.0050755	6.75571	NA	NA	NA	NA	NA	NA
Ganjdareh27	Abdul4	Direkli4	5237	4849	0.0384692	0.0384692	0.0103305	3.72384	NA	NA	NA	NA	NA	NA
Ganjdareh28	Abdul4	Direkli4	6671	6316	0.027335	0.027335	0.00996724	2.74249	NA	NA	NA	NA	NA	NA
Geor2	Abdul4	Direkli4	39693	39484	0.00263965	0.00263965	0.00525867	0.501963	NA	NA	NA	NA	NA	NA
Gilat8	Abdul4	Direkli4	841	838	0.00178678	0.00178678	0.0249822	0.071522	NA	NA	NA	NA	NA	NA
Gorgan2	Abdul4	Direkli4	9374	9088	0.0154913	0.0154913	0.00826733	1.87379	NA	NA	NA	NA	NA	NA
Hovk1	Abdul4	Direkli4	52158	65450	-0.113019	-0.113019	0.00556564	-20.3067	NA	NA	NA	NA	NA	NA
Kazbegi1	Abdul4	Direkli4	56034	56133	-0.000882613	-0.000882613	0.00451142	-0.19564	NA	NA	NA	NA	NA	NA
Kohneh2	Abdul4	Direkli4	2185	2098	0.0203129	0.0203129	0.0154648	1.31349	NA	NA	NA	NA	NA	NA
Kov57	Abdul4	Direkli4	3552	3909	-0.0478488	-0.0478488	0.0123843	-3.86366	NA	NA	NA	NA	NA	NA
Lur12	Abdul4	Direkli4	35118	31735	0.0506036	0.0506036	0.00507834	9.96459	16808	15851	0.0293028	0.0293028	0.0061465	4.7674
Monjukli1	Abdul4	Direkli4	10849	10447	0.0188768	0.0188768	0.00780579	2.4183	NA	NA	NA	NA	NA	NA
Monjukli2	Abdul4	Direkli4	9733	9157	0.0304923	0.0304923	0.00752713	4.05099	NA	NA	NA	NA	NA	NA
Monjukli4	Abdul4	Direkli4	24069	22182	0.0407991	0.0407991	0.00577969	7.05905	NA	NA	NA	NA	NA	NA
Monjukli6	Abdul4	Direkli4	1415	1322	0.0339788	0.0339788	0.0192714	1.76317	NA	NA	NA	NA	NA	NA
Monjukli8	Abdul4	Direkli4	50428	47621	0.0286285	0.0286285	0.00507736	5.63847	NA	NA	NA	NA	NA	NA
Moroccan1	Abdul4	Direkli4	59072	59846	-0.00650869	-0.00650869	0.00479179	-1.3583	NA	NA	NA	NA	NA	NA
Potterne1	Abdul4	Direkli4	57234	60332	-0.0263512	-0.0263512	0.00511999	-5.14672	26894	30208	-0.0580365	-0.0580365	0.00593098	-9.78531
Qazvin1	Abdul4	Direkli4	53730	51844	0.0178643	0.0178643	0.00475777	3.75475	NA	NA	NA	NA	NA	NA
Semnan10	Abdul4	Direkli4	37295	36453	0.0114173	0.0114173	0.00523158	2.18237	NA	NA	NA	NA	NA	NA
Semnan1-2	Abdul4	Direkli4	59233	56213	0.0261594	0.0261594	0.00460738	5.67773	22481	22471	0.00022246	0.00022246	0.00598795	0.0371512
Semnan13	Abdul4	Direkli4	50353	47484	0.0293243	0.0293243	0.00479177	6.11972	NA	NA	NA	NA	NA	NA
Semnan17	Abdul4	Direkli4	5492	5292	0.018546	0.018546	0.0104828	1.76918	NA	NA	NA	NA	NA	NA
Semnan3	Abdul4	Direkli4	60488	57230	0.0276763	0.0276763	0.00444699	6.2236	31178	29664	0.0248841	0.0248841	0.00542311	4.58853
Semnan7	Abdul4	Direkli4	53886	52369	0.014277	0.014277	0.00455984	3.13102	NA	NA	NA	NA	NA	NA
Semnan8	Abdul4	Direkli4	9130	8942	0.0104028	0.0104028	0.00815428	1.27575	NA	NA	NA	NA	NA	NA
Semnan9	Abdul4	Direkli4	54920	51901	0.0282622	0.0282622	0.00472355	5.98327	26104	26388	-0.00541035	-0.00541035	0.00547494	-0.988203
Shiqmim1	Abdul4	Direkli4	265	135	0.325	0.325	0.0466528	6.96636	NA	NA	NA	NA	NA	NA
Shiqmim9	Abdul4	Direkli4	37	27	0.15625	0.15625	0.123228	1.26798	NA	NA	NA	NA	NA	NA
Tac3	Abdul4	Direkli4	6116	6114	0.000163532	0.000163532	0.00992765	0.0164724	NA	NA	NA	NA	NA	NA
Tur2	Abdul4	Direkli4	1228	11979	-0.814038	-0.814038	0.00666124	-122.205	NA	NA	NA	NA	NA	NA
Yoqneam2	Abdul4	Direkli4	50778	50502	0.00272512	0.00272512	0.00511027	0.533263	NA	NA	NA	NA	NA	NA

## Sheet: 1H
Ganjdareh3-Direkli4 relative affinity measured using D(X, Ganjdareh3; Direkli4, Sheep).
H1	H2	H3	nABBA	nBABA	Dstat	jackEst	SE	Z	nABBA_sheep-aligned	nBABA_sheep-aligned	Dstat_sheep-aligned	jackEst_sheep-aligned	SE_sheep-aligned	Z_sheep-aligned
Abdul1	Ganjdareh3	Direkli4	7910	8052	-0.00889613	-0.00889613	0.00825698	-1.07741	NA	NA	NA	NA	NA	NA
Abdul2	Ganjdareh3	Direkli4	11067	10952	0.00522276	0.00522276	0.00736226	0.709396	NA	NA	NA	NA	NA	NA
Abdul6	Ganjdareh3	Direkli4	3926	3772	0.0200052	0.0200052	0.011694	1.71071	NA	NA	NA	NA	NA	NA
Acem1	Ganjdareh3	Direkli4	53871	55528	-0.0151464	-0.0151464	0.00451368	-3.35567	NA	NA	NA	NA	NA	NA
Acem2	Ganjdareh3	Direkli4	54773	57697	-0.025998	-0.025998	0.00442653	-5.87324	NA	NA	NA	NA	NA	NA
Ainghazal1	Ganjdareh3	Direkli4	1864	2070	-0.052364	-0.052364	0.0162268	-3.22701	NA	NA	NA	NA	NA	NA
Ainghazal2	Ganjdareh3	Direkli4	5988	3888	0.212637	0.212637	0.0108875	19.5304	NA	NA	NA	NA	NA	NA
Ainghazal3	Ganjdareh3	Direkli4	183	223	-0.0985222	-0.0985222	0.0504837	-1.95156	NA	NA	NA	NA	NA	NA
Ainghazal4	Ganjdareh3	Direkli4	466	507	-0.0421377	-0.0421377	0.0319557	-1.31863	NA	NA	NA	NA	NA	NA
AP45	Ganjdareh3	Direkli4	869	923	-0.0301339	-0.0301339	0.0231871	-1.2996	NA	NA	NA	NA	NA	NA
AP49	Ganjdareh3	Direkli4	989	1044	-0.0270536	-0.0270536	0.0218147	-1.24015	NA	NA	NA	NA	NA	NA
Azer3-5	Ganjdareh3	Direkli4	51927	53404	-0.0140225	-0.0140225	0.00451816	-3.10358	NA	NA	NA	NA	NA	NA
Azer4	Ganjdareh3	Direkli4	47002	48878	-0.0195661	-0.0195661	0.0046622	-4.19676	NA	NA	NA	NA	NA	NA
Azer6	Ganjdareh3	Direkli4	11513	11987	-0.0201702	-0.0201702	0.00738184	-2.73241	NA	NA	NA	NA	NA	NA
Blagotin16	Ganjdareh3	Direkli4	50001	56558	-0.061534	-0.061534	0.00500326	-12.2988	NA	NA	NA	NA	NA	NA
Blagotin1	Ganjdareh3	Direkli4	55813	61548	-0.0488663	-0.0488663	0.00444555	-10.9922	43713	49660	-0.0636908	-0.0636908	0.00454473	-14.0142
Blagotin2	Ganjdareh3	Direkli4	52816	58730	-0.0530185	-0.0530185	0.00470068	-11.2789	40867	45695	-0.055775	-0.055775	0.00476183	-11.7129
Blagotin3	Ganjdareh3	Direkli4	57149	63275	-0.0508703	-0.0508703	0.00441056	-11.5337	42086	49881	-0.0847587	-0.0847587	0.00462818	-18.3136
Bulak1	Ganjdareh3	Direkli4	28559	28650	-0.00159066	-0.00159066	0.00557433	-0.285355	NA	NA	NA	NA	NA	NA
Bulak2	Ganjdareh3	Direkli4	45290	46653	-0.0148244	-0.0148244	0.00474338	-3.12528	NA	NA	NA	NA	NA	NA
Bulak5	Ganjdareh3	Direkli4	11457	11662	-0.00886717	-0.00886717	0.00719609	-1.23222	NA	NA	NA	NA	NA	NA
Caucasus1	Ganjdareh3	Direkli4	28669	256887	-0.799206	-0.799206	0.00459168	-174.055	NA	NA	NA	NA	NA	NA
Chalow1	Ganjdareh3	Direkli4	2272	2122	0.0341375	0.0341375	0.015715	2.17228	NA	NA	NA	NA	NA	NA
Darre1	Ganjdareh3	Direkli4	1960	1927	0.00848984	0.00848984	0.0169825	0.499917	NA	NA	NA	NA	NA	NA
Darre2	Ganjdareh3	Direkli4	50357	52444	-0.0203014	-0.0203014	0.00446322	-4.54859	NA	NA	NA	NA	NA	NA
Direkli1-2	Ganjdareh3	Direkli4	56661	67666	-0.0885166	-0.0885166	0.0047471	-18.6465	44184	54452	-0.1041	-0.1041	0.00489077	-21.285
Direkli5	Ganjdareh3	Direkli4	11255	13609	-0.094675	-0.094675	0.00724339	-13.0705	8282	9719	-0.0798289	-0.0798289	0.00801087	-9.96507
Direkli6	Ganjdareh3	Direkli4	47317	58582	-0.106375	-0.106375	0.00502798	-21.1566	35514	43991	-0.106622	-0.106622	0.00519931	-20.507
Fars1	Ganjdareh3	Direkli4	983	989	-0.0030426	-0.0030426	0.0227104	-0.133974	NA	NA	NA	NA	NA	NA
Fars2-5	Ganjdareh3	Direkli4	1685	1665	0.00597015	0.00597015	0.0182584	0.32698	NA	NA	NA	NA	NA	NA
Fars4	Ganjdareh3	Direkli4	33418	32951	0.00703642	0.00703642	0.00504764	1.394	NA	NA	NA	NA	NA	NA
Ganjdareh18	Ganjdareh3	Direkli4	46227	45853	0.00406168	0.00406168	0.00459903	0.883162	NA	NA	NA	NA	NA	NA
Ganjdareh20	Ganjdareh3	Direkli4	49313	48124	0.0122028	0.0122028	0.00454438	2.68524	NA	NA	NA	NA	NA	NA
Ganjdareh22	Ganjdareh3	Direkli4	49109	47161	0.0202348	0.0202348	0.00479315	4.2216	34972	34050	0.0133581	0.0133581	0.00507241	2.63347
Ganjdareh24	Ganjdareh3	Direkli4	4864	4830	0.00350732	0.00350732	0.0107633	0.325858	NA	NA	NA	NA	NA	NA
Ganjdareh26	Ganjdareh3	Direkli4	35632	35077	0.00784907	0.00784907	0.00483725	1.62263	NA	NA	NA	NA	NA	NA
Ganjdareh27	Ganjdareh3	Direkli4	4773	4738	0.00367995	0.00367995	0.0105586	0.348527	NA	NA	NA	NA	NA	NA
Ganjdareh28	Ganjdareh3	Direkli4	5970	6012	-0.00350526	-0.00350526	0.00978414	-0.358259	NA	NA	NA	NA	NA	NA
Geor2	Ganjdareh3	Direkli4	36204	38070	-0.0251232	-0.0251232	0.00520566	-4.82613	NA	NA	NA	NA	NA	NA
Gilat8	Ganjdareh3	Direkli4	780	816	-0.0225564	-0.0225564	0.0255309	-0.883495	NA	NA	NA	NA	NA	NA
Gorgan2	Ganjdareh3	Direkli4	8731	8728	0.000171831	0.000171831	0.00810212	0.0212082	NA	NA	NA	NA	NA	NA
Hovk1	Ganjdareh3	Direkli4	49636	65015	-0.134137	-0.134137	0.00558777	-24.0055	NA	NA	NA	NA	NA	NA
Kazbegi1	Ganjdareh3	Direkli4	51974	54110	-0.020135	-0.020135	0.00446749	-4.50701	NA	NA	NA	NA	NA	NA
Kohneh2	Ganjdareh3	Direkli4	1972	2013	-0.0102886	-0.0102886	0.0162549	-0.632954	NA	NA	NA	NA	NA	NA
Kov57	Ganjdareh3	Direkli4	3425	3813	-0.053606	-0.053606	0.0123974	-4.32396	NA	NA	NA	NA	NA	NA
Lur12	Ganjdareh3	Direkli4	32239	30505	0.0276361	0.0276361	0.0052881	5.22609	24211	22575	0.0349677	0.0349677	0.00578294	6.0467
Monjukli1	Ganjdareh3	Direkli4	10038	9943	0.00475452	0.00475452	0.00774751	0.613683	NA	NA	NA	NA	NA	NA
Monjukli2	Ganjdareh3	Direkli4	8740	8678	0.00355954	0.00355954	0.00804549	0.442426	NA	NA	NA	NA	NA	NA
Monjukli4	Ganjdareh3	Direkli4	22556	21289	0.0288972	0.0288972	0.00551694	5.23792	NA	NA	NA	NA	NA	NA
Monjukli6	Ganjdareh3	Direkli4	1382	1330	0.019174	0.019174	0.0190309	1.00752	NA	NA	NA	NA	NA	NA
Monjukli8	Ganjdareh3	Direkli4	46578	45766	0.00879321	0.00879321	0.00481339	1.82682	NA	NA	NA	NA	NA	NA
Moroccan1	Ganjdareh3	Direkli4	55599	58400	-0.0245704	-0.0245704	0.00458228	-5.36204	NA	NA	NA	NA	NA	NA
Potterne1	Ganjdareh3	Direkli4	53527	58725	-0.0463065	-0.0463065	0.0048921	-9.46557	39339	44646	-0.0631899	-0.0631899	0.00503849	-12.5414
Qazvin1	Ganjdareh3	Direkli4	49084	49941	-0.00865438	-0.00865438	0.00486201	-1.78	NA	NA	NA	NA	NA	NA
Safi2	Ganjdareh3	Direkli4	2048	2122	-0.0177458	-0.0177458	0.0158193	-1.12178	NA	NA	NA	NA	NA	NA
Semnan10	Ganjdareh3	Direkli4	34098	34947	-0.0122963	-0.0122963	0.00511921	-2.402	NA	NA	NA	NA	NA	NA
Semnan1-2	Ganjdareh3	Direkli4	54464	53943	0.00480596	0.00480596	0.00445268	1.07934	32084	32315	-0.00358701	-0.00358701	0.00493379	-0.727029
Semnan13	Ganjdareh3	Direkli4	46153	45428	0.00791649	0.00791649	0.00471977	1.6773	NA	NA	NA	NA	NA	NA
Semnan17	Ganjdareh3	Direkli4	5007	5066	-0.00585724	-0.00585724	0.0101931	-0.574627	NA	NA	NA	NA	NA	NA
Semnan3	Ganjdareh3	Direkli4	55757	54864	0.00807261	0.00807261	0.00441884	1.82686	43140	45562	-0.0273049	-0.0273049	0.00456292	-5.98409
Semnan7	Ganjdareh3	Direkli4	49444	49997	-0.00556109	-0.00556109	0.00432824	-1.28484	NA	NA	NA	NA	NA	NA
Semnan8	Ganjdareh3	Direkli4	8451	8699	-0.0144606	-0.0144606	0.00863108	-1.67542	NA	NA	NA	NA	NA	NA
Semnan9	Ganjdareh3	Direkli4	50504	49841	0.0066072	0.0066072	0.00455445	1.45071	37376	38036	-0.00875192	-0.00875192	0.00468697	-1.86729
Shiqmim1	Ganjdareh3	Direkli4	267	122	0.372751	0.372751	0.0469035	7.94718	NA	NA	NA	NA	NA	NA
Shiqmim9	Ganjdareh3	Direkli4	43	33	0.131579	0.131579	0.114455	1.14961	NA	NA	NA	NA	NA	NA
Tac3	Ganjdareh3	Direkli4	5465	5902	-0.0384446	-0.0384446	0.0100357	-3.83077	NA	NA	NA	NA	NA	NA
Tur2	Ganjdareh3	Direkli4	1229	11754	-0.810675	-0.810675	0.00673642	-120.342	NA	NA	NA	NA	NA	NA
Yoqneam2	Ganjdareh3	Direkli4	46984	48700	-0.017934	-0.017934	0.00481467	-3.72488	NA	NA	NA	NA	NA	NA

## Sheet: 1I
Direkli4-Tur1 (west Caucasian tur) relative affinity measured using D(Direkli4, Tur1; X, Sheep).
H1	H2	H3	nABBA	nBABA	Dstat	jackEst	SE	Z	nABBA_sheep-aligned	nBABA_sheep-aligned	Dstat_sheep-aligned	jackEst_sheep-aligned	SE_sheep-aligned	Z_sheep-aligned
Direkli4	Tur1	Abdul1	9468	10553	-0.0541931	-0.0541931	0.00940992	-5.75915	NA	NA	NA	NA	NA	NA
Direkli4	Tur1	Abdul2	13422	14599	-0.0420042	-0.0420042	0.00838711	-5.00819	NA	NA	NA	NA	NA	NA
Direkli4	Tur1	Abdul6	4502	5119	-0.0641305	-0.0641305	0.0120162	-5.33702	NA	NA	NA	NA	NA	NA
Direkli4	Tur1	Acem1	63656	71997	-0.0614878	-0.0614878	0.00642981	-9.56292	NA	NA	NA	NA	NA	NA
Direkli4	Tur1	Acem2	65450	74444	-0.0642915	-0.0642915	0.0064458	-9.97417	NA	NA	NA	NA	NA	NA
Direkli4	Tur1	Ainghazal1	1954	2167	-0.0516865	-0.0516865	0.0170239	-3.03611	NA	NA	NA	NA	NA	NA
Direkli4	Tur1	Ainghazal2	3757	4117	-0.0457201	-0.0457201	0.0125629	-3.6393	NA	NA	NA	NA	NA	NA
Direkli4	Tur1	Ainghazal3	194	208	-0.0348259	-0.0348259	0.0515505	-0.675568	NA	NA	NA	NA	NA	NA
Direkli4	Tur1	Ainghazal4	497	509	-0.0119284	-0.0119284	0.0335197	-0.355864	NA	NA	NA	NA	NA	NA
Direkli4	Tur1	AP45	1056	1153	-0.0439113	-0.0439113	0.0229975	-1.9094	NA	NA	NA	NA	NA	NA
Direkli4	Tur1	AP49	1177	1217	-0.0167084	-0.0167084	0.021529	-0.77609	NA	NA	NA	NA	NA	NA
Direkli4	Tur1	Azer3-5	63212	71773	-0.0634219	-0.0634219	0.00654971	-9.68316	NA	NA	NA	NA	NA	NA
Direkli4	Tur1	Azer4	58090	65624	-0.0608985	-0.0608985	0.00649748	-9.37264	NA	NA	NA	NA	NA	NA
Direkli4	Tur1	Azer6	14427	16358	-0.0627253	-0.0627253	0.00823477	-7.61714	NA	NA	NA	NA	NA	NA
Direkli4	Tur1	Blagotin16	60197	67378	-0.0562885	-0.0562885	0.00655938	-8.58137	NA	NA	NA	NA	NA	NA
Direkli4	Tur1	Blagotin1	65180	73934	-0.0629268	-0.0629268	0.00645076	-9.75494	39324	53855	-0.155947	-0.155947	0.00586442	-26.5921
Direkli4	Tur1	Blagotin2	62059	69778	-0.0585496	-0.0585496	0.00644176	-9.08906	36021	49201	-0.154655	-0.154655	0.00603759	-25.6153
Direkli4	Tur1	Blagotin3	65848	74937	-0.0645594	-0.0645594	0.00631396	-10.2249	38738	53661	-0.161506	-0.161506	0.0059236	-27.2648
Direkli4	Tur1	Bulak1	34954	39590	-0.0621915	-0.0621915	0.00690875	-9.00184	NA	NA	NA	NA	NA	NA
Direkli4	Tur1	Bulak2	56285	63768	-0.0623308	-0.0623308	0.00654047	-9.53001	NA	NA	NA	NA	NA	NA
Direkli4	Tur1	Bulak5	14139	15670	-0.0513603	-0.0513603	0.00809515	-6.34458	NA	NA	NA	NA	NA	NA
Direkli4	Tur1	Caucasus1	66631	46363	0.179372	0.179372	0.00530546	33.809	NA	NA	NA	NA	NA	NA
Direkli4	Tur1	Chalow1	2848	3171	-0.0536634	-0.0536634	0.0141436	-3.79417	NA	NA	NA	NA	NA	NA
Direkli4	Tur1	Darre1	2380	2627	-0.0493309	-0.0493309	0.015644	-3.15334	NA	NA	NA	NA	NA	NA
Direkli4	Tur1	Darre2	62331	70501	-0.0615063	-0.0615063	0.00647411	-9.50034	NA	NA	NA	NA	NA	NA
Direkli4	Tur1	Direkli1-2	66635	76092	-0.0662594	-0.0662594	0.00643279	-10.3003	41265	56498	-0.155816	-0.155816	0.00600289	-25.9568
Direkli4	Tur1	Direkli5	14135	15865	-0.0576667	-0.0576667	0.00838302	-6.87898	7152	9580	-0.145111	-0.145111	0.0088972	-16.3098
Direkli4	Tur1	Direkli6	58041	65368	-0.0593717	-0.0593717	0.0067398	-8.80912	32881	44612	-0.151381	-0.151381	0.00621293	-24.3655
Direkli4	Tur1	Fars1	1192	1401	-0.0806016	-0.0806016	0.02066	-3.90133	NA	NA	NA	NA	NA	NA
Direkli4	Tur1	Fars2-5	1946	2154	-0.0507317	-0.0507317	0.016825	-3.01526	NA	NA	NA	NA	NA	NA
Direkli4	Tur1	Fars4	40243	44914	-0.0548516	-0.0548516	0.00678693	-8.08195	NA	NA	NA	NA	NA	NA
Direkli4	Tur1	Ganjdareh18	55807	61805	-0.0509982	-0.0509982	0.00675914	-7.54507	NA	NA	NA	NA	NA	NA
Direkli4	Tur1	Ganjdareh20	58365	65630	-0.0585911	-0.0585911	0.00667854	-8.77304	31064	41312	-0.141594	-0.141594	0.00633955	-22.335
Direkli4	Tur1	Ganjdareh22	58131	65202	-0.0573326	-0.0573326	0.0065949	-8.69347	NA	NA	NA	NA	NA	NA
Direkli4	Tur1	Ganjdareh24	5893	6471	-0.0467486	-0.0467486	0.0108698	-4.30079	NA	NA	NA	NA	NA	NA
Direkli4	Tur1	Ganjdareh26	43027	47457	-0.0489589	-0.0489589	0.00681207	-7.18709	NA	NA	NA	NA	NA	NA
Direkli4	Tur1	Ganjdareh27	5634	6441	-0.0668323	-0.0668323	0.0110988	-6.0216	NA	NA	NA	NA	NA	NA
Direkli4	Tur1	Ganjdareh28	7269	8140	-0.0565254	-0.0565254	0.0101348	-5.57735	NA	NA	NA	NA	NA	NA
Direkli4	Tur1	Geor2	46713	52394	-0.0573219	-0.0573219	0.00678295	-8.45088	NA	NA	NA	NA	NA	NA
Direkli4	Tur1	Gilat8	930	1002	-0.0372671	-0.0372671	0.0239789	-1.55416	NA	NA	NA	NA	NA	NA
Direkli4	Tur1	Gorgan2	10417	11533	-0.0508428	-0.0508428	0.00916195	-5.54934	NA	NA	NA	NA	NA	NA
Direkli4	Tur1	Hovk1	61560	70168	-0.0653468	-0.0653468	0.00655886	-9.96312	NA	NA	NA	NA	NA	NA
Direkli4	Tur1	Kazbegi1	63054	71442	-0.0623662	-0.0623662	0.00649835	-9.59722	NA	NA	NA	NA	NA	NA
Direkli4	Tur1	Kohneh2	2412	2639	-0.0449416	-0.0449416	0.0155225	-2.89526	NA	NA	NA	NA	NA	NA
Direkli4	Tur1	Kov57	4035	4634	-0.0690968	-0.0690968	0.0121687	-5.67822	NA	NA	NA	NA	NA	NA
Direkli4	Tur1	Lur12	37877	42292	-0.0550712	-0.0550712	0.00696394	-7.90805	20280	27235	-0.146375	-0.146375	0.0068279	-21.4378
Direkli4	Tur1	Monjukli1	12437	14011	-0.059513	-0.059513	0.00862221	-6.90229	NA	NA	NA	NA	NA	NA
Direkli4	Tur1	Monjukli2	11041	12613	-0.0664581	-0.0664581	0.00879862	-7.55324	NA	NA	NA	NA	NA	NA
Direkli4	Tur1	Monjukli4	26581	29186	-0.0467122	-0.0467122	0.00739877	-6.31351	NA	NA	NA	NA	NA	NA
Direkli4	Tur1	Monjukli6	1669	1724	-0.0162098	-0.0162098	0.0190143	-0.852507	NA	NA	NA	NA	NA	NA
Direkli4	Tur1	Monjukli8	56194	63040	-0.0574165	-0.0574165	0.00655234	-8.76276	NA	NA	NA	NA	NA	NA
Direkli4	Tur1	Potterne1	63195	71480	-0.0615185	-0.0615185	0.00634799	-9.69102	36928	49093	-0.141419	-0.141419	0.00598359	-23.6345
Direkli4	Tur1	Qazvin1	59944	67617	-0.0601516	-0.0601516	0.00653108	-9.21005	NA	NA	NA	NA	NA	NA
Direkli4	Tur1	Safi2	2473	2761	-0.0550248	-0.0550248	0.0159084	-3.45886	NA	NA	NA	NA	NA	NA
Direkli4	Tur1	Semnan10	42673	47726	-0.0558966	-0.0558966	0.00689058	-8.11204	NA	NA	NA	NA	NA	NA
Direkli4	Tur1	Semnan1-2	64697	73350	-0.0626816	-0.0626816	0.00650266	-9.63937	29387	39178	-0.142799	-0.142799	0.00639062	-22.3451
Direkli4	Tur1	Semnan13	56367	63933	-0.0628928	-0.0628928	0.00654934	-9.60291	NA	NA	NA	NA	NA	NA
Direkli4	Tur1	Semnan17	6505	7364	-0.0619367	-0.0619367	0.0101895	-6.07847	NA	NA	NA	NA	NA	NA
Direkli4	Tur1	Semnan3	65641	74534	-0.0634421	-0.0634421	0.00647931	-9.79149	41478	55702	-0.146368	-0.146368	0.0058849	-24.8717
Direkli4	Tur1	Semnan7	60069	67709	-0.0597912	-0.0597912	0.00658531	-9.07948	NA	NA	NA	NA	NA	NA
Direkli4	Tur1	Semnan8	10676	11726	-0.0468708	-0.0468708	0.00899031	-5.21348	NA	NA	NA	NA	NA	NA
Direkli4	Tur1	Semnan9	60590	68023	-0.0577935	-0.0577935	0.00651549	-8.87018	34894	46333	-0.140828	-0.140828	0.00614707	-22.9097
Direkli4	Tur1	Shiqmim1	128	139	-0.0411985	-0.0411985	0.0636483	-0.647284	NA	NA	NA	NA	NA	NA
Direkli4	Tur1	Shiqmim9	44	49	-0.0537634	-0.0537634	0.109019	-0.493156	NA	NA	NA	NA	NA	NA
Direkli4	Tur1	Tac3	7123	7902	-0.0518469	-0.0518469	0.0101974	-5.08434	NA	NA	NA	NA	NA	NA
Direkli4	Tur1	Tur2	2919	1973	0.193377	0.193377	0.0149301	12.9521	NA	NA	NA	NA	NA	NA
Direkli4	Tur1	Yoqneam2	55523	62538	-0.0594184	-0.0594184	0.00659412	-9.01083	NA	NA	NA	NA	NA	NA
Direkli4	Tur1	Moroccan1	66215	74078	-0.056047	-0.056047	0.00655904	-8.545	NA	NA	NA	NA	NA	NA
Direkli4	Tur1	Ganjdareh3	53121	59308	-0.0550303	-0.0550303	0.00663386	-8.29537	NA	NA	NA	NA	NA	NA
Direkli4	Tur1	Abdul4	55614	62184	-0.0557734	-0.0557734	0.00655875	-8.50367	NA	NA	NA	NA	NA	NA

## Sheet: 1J
Extended D statistic, Direkli4 set as H3 (“Direkli4-specific alleles”).
H2	H3	Extended_D_All	Extended_D_All_SE	Extended_D_All_Z	Extended_D_All_nABBAA	Extended_D_All_nBABAA	Extended_D_Transv	Extended_D_Transv_SE	Extended_D_Transv_Z	Extended_D_Transv_nABBAA	Extended_D_Transv_nBABAA	Note
Acem1	Direkli4	0.0834915	0.0255661	3.2657	2284	1932	0.0878605	0.0255661	3.4366	811	680
Acem2	Direkli4	0.0263405	0.0514228	0.512235	2182	2070	-0.0632223	0.0514228	-1.22946	689	782
Aerbasi1	Direkli4	-0.245996	0.0368753	-6.67102	918	1517	-0.285223	0.0368753	-7.73481	312	561
Aerbasi2	Direkli4	-0.216567	0.0624111	-3.47	1239	1924	-0.329214	0.0624111	-5.27494	380	753
Aerbasi3	Direkli4	-0.254636	0.0627947	-4.05506	824	1387	-0.362468	0.0627947	-5.77227	248	530
Aerbasi4	Direkli4	-0.21724	0.0451359	-4.81303	1353	2104	-0.291181	0.0451359	-6.45122	426	776
Aerbasi6	Direkli4	-0.208224	0.0800143	-2.60234	1059	1616	-0.357602	0.0800143	-4.46922	300	634
Azer3.5	Direkli4	0.0141881	0.0714621	0.19854	1930	1876	-0.117318	0.0714621	-1.64169	553	700
Azer4	Direkli4	0.0150099	0.0380007	0.39499	1792	1739	-0.0407674	0.0380007	-1.0728	600	651
Bangladeshi1	Direkli4	-0.109979	0.0536974	-2.04812	1659	2069	-0.0155642	0.0536974	-0.28985	759	783
Bangladeshi2	Direkli4	-0.254021	0.0570597	-4.45185	1229	2066	-0.356902	0.0570597	-6.2549	382	806
Bangladeshi3	Direkli4	-0.271951	0.0477561	-5.69459	1194	2086	-0.355116	0.0477561	-7.43604	375	788
Bangladeshi4	Direkli4	-0.258554	0.056732	-4.55747	1246	2115	-0.358234	0.056732	-6.31451	378	800
Bangladeshi5	Direkli4	-0.260324	0.0597027	-4.36034	1209	2060	-0.366524	0.0597027	-6.13915	369	796
Bangladeshi6	Direkli4	-0.296355	0.0490944	-6.03643	1110	2045	-0.377778	0.0490944	-7.69493	350	775
Bangladeshi7	Direkli4	-0.302266	0.0486038	-6.21898	1093	2040	-0.383378	0.0486038	-7.88782	345	774
Bangladeshi8	Direkli4	-0.241697	0.0340132	-7.10599	1233	2019	-0.288364	0.0340132	-8.47801	422	764
Blagotin1	Direkli4	0.143755	0.041954	3.42649	2729	2043	0.0746988	0.041954	1.78049	892	768
Blagotin1	Direkli4	0.136006	0.0171904	7.91177	14237	10828	0.112818	0.0171904	6.56287	2535	2021	Sheep aligned
Blagotin16	Direkli4	0.150155	0.0337656	4.44698	2409	1780	0.102493	0.0337656	3.03543	796	648
Blagotin2	Direkli4	0.142923	0.033484	4.26841	2467	1850	0.0943894	0.033484	2.81894	829	686
Blagotin2	Direkli4	0.142724	0.016106	8.86158	13519	10142	0.123519	0.016106	7.66917	2324	1813	Sheep aligned
Blagotin3	Direkli4	0.185981	0.0249767	7.44616	2927	2009	0.163511	0.0249767	6.54655	1014	729
Blagotin3	Direkli4	0.133214	0.0171894	7.74977	13968	10684	0.158412	0.0171894	9.21563	2713	1971	Sheep aligned
Bulak1	Direkli4	-0.0508299	0.0362673	-1.40153	915	1013	-0.031339	0.0362673	-0.864113	340	362
Bulak2	Direkli4	-0.0176854	0.0551255	-0.32082	1583	1640	-0.115315	0.0551255	-2.09187	491	619
Chinese1	Direkli4	-0.278413	0.0539657	-5.15906	1200	2126	-0.374368	0.0539657	-6.93714	371	815
Chinese2	Direkli4	-0.317209	0.0594006	-5.34017	1101	2124	-0.424955	0.0594006	-7.15405	318	788
Chinese3	Direkli4	-0.249547	0.0431311	-5.78578	1242	2068	-0.320598	0.0431311	-7.43311	409	795
Chinese4	Direkli4	-0.291553	0.0493896	-5.90312	1170	2133	-0.374893	0.0493896	-7.59052	366	805
Chinese5	Direkli4	-0.274864	0.0506812	-5.4234	1203	2115	-0.356106	0.0506812	-7.0264	377	794
Chinese6	Direkli4	-0.27845	0.0434058	-6.41504	1192	2112	-0.345118	0.0434058	-7.95095	389	799
Chinese7	Direkli4	-0.233927	0.071665	-3.26417	1269	2044	-0.366782	0.071665	-5.11801	366	790
Chinese8	Direkli4	-0.183123	0.0345376	-5.30214	1394	2019	-0.227984	0.0345376	-6.60101	469	746
Chinese9	Direkli4	-0.231642	0.0691652	-3.34911	1287	2063	-0.359143	0.0691652	-5.19255	389	825
CHIR1	Direkli4	-0.225863	0.0670602	-3.36806	1335	2114	-0.351396	0.0670602	-5.24	395	823
CHIR1	Direkli4	-0.399014	0.052283	-7.6318	4935	11488	-0.298036	0.052283	-5.70044	1233	2280	Sheep aligned
Darre2	Direkli4	-0.013169	0.0544822	-0.241711	1761	1808	-0.107642	0.0544822	-1.97572	543	674
Dutch1	Direkli4	-0.103183	0.079522	-1.29754	1747	2149	-0.25228	0.079522	-3.17245	492	824
Dutch1	Direkli4	-0.449797	0.046888	-9.593	4192	11046	-0.360625	0.046888	-7.6912	1023	2177	Sheep aligned
Dutch2	Direkli4	-0.0801899	0.0622447	-1.2883	1841	2162	-0.192806	0.0622447	-3.09755	561	829
Dutch3	Direkli4	-0.0600562	0.0568705	-1.05602	1839	2074	-0.15727	0.0568705	-2.7654	568	780
Erlangshan1	Direkli4	-0.1792	0.049824	-3.59666	1026	1474	-0.260369	0.049824	-5.22576	321	547
Erlangshan2	Direkli4	-0.171627	0.0512861	-3.34647	1489	2106	-0.258481	0.0512861	-5.03999	459	779
Erlangshan3	Direkli4	-0.181302	0.0629955	-2.87802	1226	1769	-0.295888	0.0629955	-4.69697	351	646
Erlangshan4	Direkli4	-0.232472	0.059525	-3.90546	832	1336	-0.336683	0.059525	-5.65617	264	532
Fars4	Direkli4	-0.0122227	0.036988	-0.330451	1091	1118	0.0334487	0.036988	0.904312	448	419
French1	Direkli4	-0.0254669	0.0739451	-0.344403	2009	2114	-0.162281	0.0739451	-2.19461	573	795
French2	Direkli4	-0.0452286	0.0533797	-0.8473	1921	2103	-0.137399	0.0533797	-2.57399	587	774
French3	Direkli4	-0.0814268	0.0655423	-1.24235	1867	2198	-0.202321	0.0655423	-3.08687	550	829
French4	Direkli4	-0.0563552	0.0716977	-0.786011	1934	2165	-0.18858	0.0716977	-2.63021	540	791
French5	Direkli4	-0.045858	0.061409	-0.746763	1935	2121	-0.154993	0.061409	-2.52394	567	775
French6	Direkli4	-0.0644285	0.0751934	-0.856838	1895	2156	-0.204052	0.0751934	-2.7137	550	832
Geor2	Direkli4	-0.0345089	0.0770933	-0.447625	1273	1364	-0.178612	0.0770933	-2.31683	361	518
IOG	Direkli4	-0.0285714	0.0562278	-0.508137	2057	2178	-0.127899	0.0562278	-2.27466	658	851
IOG	Direkli4	-0.401772	0.0675337	-5.9492	4761	11156	-0.271269	0.0675337	-4.01679	1272	2219	Sheep aligned
Iranian1	Direkli4	-0.194849	0.0606277	-3.21386	1438	2134	-0.307125	0.0606277	-5.06576	423	798
Iranian10	Direkli4	-0.168846	0.0651988	-2.58971	1462	2056	-0.287867	0.0651988	-4.41522	449	812
Iranian11	Direkli4	-0.173829	0.06282	-2.76709	1490	2117	-0.286614	0.06282	-4.56247	453	817
Iranian12	Direkli4	-0.243371	0.0780946	-3.11636	1284	2110	-0.391076	0.0780946	-5.00772	348	795
Iranian13	Direkli4	-0.182074	0.058243	-3.12612	1451	2097	-0.285598	0.058243	-4.90356	439	790
Iranian14	Direkli4	-0.247052	0.0645806	-3.82548	1309	2168	-0.365	0.0645806	-5.65185	381	819
Iranian15	Direkli4	-0.174333	0.0793666	-2.19655	1454	2068	-0.323077	0.0793666	-4.07069	396	774
Iranian16	Direkli4	-0.192903	0.0481647	-4.00508	1433	2118	-0.268887	0.0481647	-5.58266	450	781
Iranian17	Direkli4	-0.233712	0.0789993	-2.95841	1382	2225	-0.384127	0.0789993	-4.86241	388	872
Iranian18	Direkli4	-0.213225	0.070857	-3.00923	1404	2165	-0.346872	0.070857	-4.89539	402	829
Iranian19	Direkli4	-0.212238	0.044487	-4.77079	1429	2199	-0.286174	0.044487	-6.43274	444	800
Iranian2	Direkli4	-0.209862	0.0606932	-3.45776	1378	2110	-0.320095	0.0606932	-5.27399	428	831
Iranian20	Direkli4	-0.141298	0.0601631	-2.34859	1574	2092	-0.24613	0.0601631	-4.09105	487	805
Iranian21	Direkli4	-0.262998	0.0657615	-3.99927	1212	2077	-0.382997	0.0657615	-5.82404	352	789
Iranian21	Direkli4	-0.528901	0.0440108	-12.0175	3415	11083	-0.445609	0.0440108	-10.125	846	2206	Sheep aligned
Iranian22	Direkli4	-0.19485	0.0396391	-4.9156	1407	2088	-0.252033	0.0396391	-6.35818	460	770
Iranian23	Direkli4	-0.209263	0.0578009	-3.62041	1400	2141	-0.313457	0.0578009	-5.42305	426	815
Iranian3	Direkli4	-0.157695	0.0710019	-2.221	1557	2140	-0.289308	0.0710019	-4.07465	452	820
Iranian4	Direkli4	-0.21954	0.0516536	-4.25023	1390	2172	-0.310513	0.0516536	-6.01146	423	804
Iranian5	Direkli4	-0.18998	0.0711164	-2.6714	1439	2114	-0.321486	0.0711164	-4.52056	420	818
Iranian6	Direkli4	-0.161594	0.0595658	-2.71286	1515	2099	-0.267974	0.0595658	-4.49879	448	776
Iranian7	Direkli4	-0.170129	0.0780196	-2.1806	1478	2084	-0.315243	0.0780196	-4.04057	429	824
Iranian8	Direkli4	-0.185453	0.0636294	-2.91457	1467	2135	-0.301338	0.0636294	-4.73582	444	827
Iranian9	Direkli4	-0.186323	0.0618865	-3.01072	1404	2047	-0.296575	0.0618865	-4.79224	421	776
Italian1	Direkli4	-0.0233791	0.0537878	-0.434655	2026	2123	-0.116345	0.0537878	-2.16305	619	782
Italian2	Direkli4	-0.0683166	0.0646197	-1.05721	1807	2072	-0.185629	0.0646197	-2.87263	544	792
Italian3	Direkli4	-0.104762	0.060324	-1.73665	1786	2204	-0.215853	0.060324	-3.57822	554	859
Italian4	Direkli4	-0.0650858	0.0571895	-1.13807	1853	2111	-0.166294	0.0571895	-2.90777	559	782
Italian4	Direkli4	-0.434325	0.047902	-9.06695	4382	11111	-0.342717	0.047902	-7.15454	1074	2194	Sheep aligned
Italian5	Direkli4	-0.0716944	0.0657339	-1.09068	1871	2160	-0.190851	0.0657339	-2.90338	566	833
Kazbegi1	Direkli4	-0.0364146	0.0563976	-0.645676	1892	2035	-0.135952	0.0563976	-2.41059	572	752
Monjukli4	Direkli4	-0.0218579	0.0452908	-0.482613	716	748	0.0384615	0.0452908	0.849214	297	275
Monjukli8	Direkli4	-0.0846916	0.0283221	-2.9903	1432	1697	-0.10741	0.0283221	-3.79246	536	665
Moroccan1	Direkli4	-0.0951009	0.0765095	-1.24299	1727	2090	-0.24166	0.0765095	-3.15856	466	763
Moroccan18	Direkli4	-0.119617	0.0815018	-1.46766	1656	2106	-0.272869	0.0815018	-3.34802	465	814
Moroccan2	Direkli4	-0.0898296	0.0809368	-1.10987	1763	2111	-0.241699	0.0809368	-2.98627	491	804
Moroccan3	Direkli4	-0.0866463	0.0709994	-1.22038	1792	2132	-0.217264	0.0709994	-3.06008	535	832
Moroccan4	Direkli4	-0.108569	0.0752258	-1.44323	1753	2180	-0.248132	0.0752258	-3.29849	503	835
Moroccan5	Direkli4	-0.0567269	0.0651415	-0.870825	1879	2105	-0.171864	0.0651415	-2.63831	571	808
Moroccan6	Direkli4	-0.0922306	0.0660861	-1.39561	1811	2179	-0.216643	0.0660861	-3.27819	546	848
Moroccan7	Direkli4	-0.0812297	0.0936496	-0.867379	1838	2163	-0.258529	0.0936496	-2.7606	489	830
Moroccan8	Direkli4	-0.121645	0.0796064	-1.52808	1751	2236	-0.271651	0.0796064	-3.41242	492	859
Moroccan9	Direkli4	-0.0654019	0.0774708	-0.844214	1872	2134	-0.209713	0.0774708	-2.70699	537	822
Pakistani1	Direkli4	-0.260613	0.0882546	-2.95297	1254	2138	-0.429329	0.0882546	-4.86466	323	809
Pakistani2	Direkli4	-0.256036	0.0513909	-4.98213	1248	2107	-0.345248	0.0513909	-6.71808	403	828
Pakistani3	Direkli4	-0.232971	0.0691091	-3.37106	1340	2154	-0.360643	0.0691091	-5.21845	398	847
Pakistani4	Direkli4	-0.260514	0.0708999	-3.67439	1266	2158	-0.394046	0.0708999	-5.55777	346	796
Pakistani5	Direkli4	-0.261854	0.074981	-3.49228	1222	2089	-0.40378	0.074981	-5.3851	347	817
Potterne1	Direkli4	0.131031	0.0374378	3.49998	2473	1900	0.0840108	0.0374378	2.24401	800	676
Potterne1	Direkli4	0.0113917	0.0158225	0.719972	10432	10197	0.0261007	0.0158225	1.6496	1946	1847	Sheep aligned
Qazvin1	Direkli4	0.00955056	0.0352609	0.270854	1797	1763	-0.0334928	0.0352609	-0.949857	606	648
Semnan1.2	Direkli4	-0.0596365	0.0230259	-2.58998	1837	2070	-0.0564516	0.0230259	-2.45166	702	786
Semnan1.2	Direkli4	-0.00560951	0.0168608	-0.332696	8243	8336	-0.0255682	0.0168608	-1.51643	1372	1444	Sheep aligned
Semnan10	Direkli4	0.000825764	0.0456306	0.0180967	1212	1210	-0.0704898	0.0456306	-1.54479	389	448
Semnan13	Direkli4	-0.0588235	0.027835	-2.1133	1488	1674	-0.0697264	0.027835	-2.50499	527	606
Semnan3	Direkli4	-0.00827653	0.0258732	-0.319888	2037	2071	-0.0251656	0.0258732	-0.972648	736	774
Semnan3	Direkli4	0.0168198	0.0212157	0.792797	11456	11077	-0.0176358	0.0212157	-0.831262	2061	2135	Sheep aligned
Semnan7	Direkli4	0.0436756	0.0448486	0.973843	1840	1686	-0.0293871	0.0448486	-0.65525	578	613
Semnan9	Direkli4	-0.0465707	0.0269529	-1.72786	1689	1854	-0.0585586	0.0269529	-2.17263	627	705
Semnan9	Direkli4	-0.0360777	0.0310108	-1.16339	8857	9520	0.0191684	0.0310108	0.61812	1728	1663	Sheep aligned
Sudanese1	Direkli4	-0.114643	0.0280494	-4.08718	1699	2139	-0.137336	0.0280494	-4.89622	625	824
Sudanese2	Direkli4	-0.0787848	0.0273122	-2.8846	1789	2095	-0.0899329	0.0273122	-3.29277	678	812
Sudanese3	Direkli4	-0.0467793	0.0334245	-1.39955	1946	2137	-0.0895722	0.0334245	-2.67984	681	815
Sudanese4	Direkli4	-0.0835041	0.0269678	-3.09644	1789	2115	-0.10218	0.0269678	-3.78896	659	809
Sudanese5	Direkli4	-0.0789074	0.0339684	-2.32297	1821	2133	-0.12426	0.0339684	-3.65812	666	855
Sudanese6	Direkli4	-0.0842583	0.0259077	-3.25224	1815	2149	-0.0672098	0.0259077	-2.5942	687	786
Swiss1	Direkli4	-0.0129933	0.0432639	-0.300326	2051	2105	-0.0794702	0.0432639	-1.83687	695	815
Swiss2	Direkli4	-0.0459024	0.0341497	-1.34415	1985	2176	-0.0926049	0.0341497	-2.71173	681	820
Tog	Direkli4	-0.0165975	0.0250832	-0.6617	2133	2205	-0.0381862	0.0250832	-1.52238	806	870
Tog	Direkli4	-0.400438	0.0758439	-5.27977	4789	11186	-0.25211	0.0758439	-3.32407	1329	2225	Sheep aligned

[truncated: 3 more sheets: 1K, 1L, 1M]
